# Supplementary material
Source: PubMed Central journal article supplement (PMC2453781)
Supplement: NIHMS56345-supplement-1.pdf [file NIHMS56345-supplement-1.pdf]

## SUPPORTING INFORMATION

**Dynamic Effects on the Periselectivity, Rate, Isotope  
Effects, and Mechanism of Cycloadditions of Ketenes with  
Cyclopentadiene**

Bryson R. Ussing, Chao Hang, and Daniel A. Singleton\*

*Department of Chemistry, Texas A&M University, PO Box 30012,*

*College Station, Texas 77842*

singleton@mail.chem.tamu.edu

**Table of Contents**

|                                                            |    |
|------------------------------------------------------------|----|
| Additional Information on Experimental Procedures .....    | 3  |
| General .....                                              | 3  |
| Preparation of Samples of 7 for NMR Analysis.....          | 3  |
| Preparation of Samples of 4 for NMR Analysis.....          | 3  |
| NMR Integration Results .....                              | 4  |
| <sup>13</sup> C NMR Spectra of 4 and 7 .....               | 6  |
| Kinetic Simulations .....                                  | 8  |
| No-Cycloreversion Model .....                              | 8  |
| Cycloreversion Model .....                                 | 8  |
| Mixed Model .....                                          | 10 |
| Theoretical Results .....                                  | 12 |
| Comment on BPW91 and HF results. ....                      | 12 |
| Tables of Energies .....                                   | 12 |
| Potential Energy and Potential Energy + zpe .....          | 12 |
| Estimates of Relative Free Energies .....                  | 15 |
| Cyclopentadiene (1) MPW1K/6-31G(d) .....                   | 18 |
| diphenylketene (2) MPW1K/6-31G(d) .....                    | 18 |
| 4+2_prod (3) MPW1K/6-31G(d) .....                          | 19 |
| 2+2_prod (4) MPW1K/6-31G(d) .....                          | 21 |
| Dichloroketene (5) MPW1K/6-31G* .....                      | 22 |
| Dichloro 2+2 product (7) MPW1K/6-31G* .....                | 22 |
| Dichloro 4+2 product (8) MPW1K/6-31G* .....                | 23 |
| TS 2+2 (10) MPW1K/6-31G(d) .....                           | 24 |
| 1st_TS (9) MPW1K/6-31G(d) .....                            | 25 |
| 2 <sup>nd</sup> TS rearrangement (11) MPW1K/6-31G(d) ..... | 26 |
| Dichloro 1 <sup>st</sup> TS (16) MPW1K/6-31G* .....        | 27 |
| 2 <sup>nd</sup> TS rearrangement (17) MPW1K/6-31G* .....   | 28 |
| Dichloro 2+2 TS (Similar to 10) MPW1K/6-31G*.....          | 29 |
| Cyclopentadiene (1) MPW1K/6-31+G(d,p) .....                | 30 |
| diphenylketene (2) MPW1K/6-31+G(d,p) .....                 | 30 |
| 4+2_product (3) MPW1K/6-31+G(d,p) .....                    | 31 |
| 2+2_product (4) MPW1K/6-31+G(d,p) .....                    | 32 |
| Dichloroketene (5) MPW1K/6-31+G** .....                    | 33 |
| Dichloro 2+2 product (7) MPW1K/6-31+G** .....              | 33 |
| Dichloro 4+2 product (8) MPW1K/6-31+G** .....              | 34 |
| TS_2+2 (10) MPW1K/6-31+G(d,p) .....                        | 35 |
| 1st_TS (9) MPW1K/6-31+G(d,p) .....                         | 36 |
| 2ndTS_rearrangement (11) MPW1K/6-31+G(d,p).....            | 37 |
| Dichloro 1st TS (16) MPW1K/6-31+G** .....                  | 38 |

|                                                                            |    |
|----------------------------------------------------------------------------|----|
| Dichloro 2 <sup>nd</sup> TS rearrangement (17) MPW1K/6-31+G**              | 39 |
| Dichloro 2+2 TS (similar to 10) mPW1K                                      | 40 |
| Cyclopentadiene (1) B3LYP/6-31G(d)                                         | 41 |
| Diphenylketene (2) B3LYP/6-31G(d)                                          | 41 |
| 4+2 Product (3) B3LYP/6-31G(d)                                             | 42 |
| 2+2 Product (4) B3LYP/6-31G(d)                                             | 43 |
| Dichloroketene (5) B3LYP/6-31G*                                            | 44 |
| Dichloro 2+2 product (7) B3LYP/6-31G*                                      | 44 |
| Dichloro 4+2 Product (8) B3LYP/6-31G*                                      | 45 |
| 1st_TS (12) B3LYP/6-31G(d)                                                 | 45 |
| Intermediate (13) B3LYP/6-31G(d)                                           | 47 |
| 2ndTS giving 4+2 (14) B3LYP/6-31G(d)                                       | 48 |
| 2ndTS giving 2+2 (15) B3LYP/6-31G(d)                                       | 49 |
| Another TS that gives 2+2 (Similar to 10) B3LYP/6-31G(d)                   | 50 |
| Dichloro 1st TS (18) B3LYP/6-31G*                                          | 51 |
| Dichloro intermediate (19) B3LYP/6-31G*                                    | 52 |
| 2 <sup>nd</sup> TS Dichloro 2+2 side (20) B3LYP/6-31G*                     | 53 |
| 2 <sup>nd</sup> TS Dichloro 4+2 side (21) B3LYP/6-31G*                     | 54 |
| Dichloro 2+2 TS (Similar to 10) B3LYP/6-31G*                               | 55 |
| cyclopentadiene (1) B3LYP/6-311+G(d,p)                                     | 55 |
| diphenylketene (2) B3LYP/6-311+G(d,p)                                      | 56 |
| 4+2_product (3) B3LYP/6-311+G(d,p)                                         | 57 |
| 2+2_product (4) B3LYP/6-311+G(d,p)                                         | 58 |
| Dichloroketene (5) B3LYP/6-311+G**                                         | 59 |
| Dichloro 2+2 product (7) B3LYP/6-311+G**                                   | 59 |
| Dichloro 4+2 product (8) B3LYP/6-311+G**                                   | 60 |
| 1st_TS (12) B3LYP/6-311+G(d,p)                                             | 60 |
| intermediate (13) B3LYP/6-311+G(d,p)                                       | 61 |
| 2ndTS giving 4+2 (14) B3LYP/6-311+G(d,p)                                   | 62 |
| 2ndTS giving 2+2 (15) B3LYP/6-311+G(d,p)                                   | 63 |
| Another diphenyl TS giving 2+2 directly (Similar to 10) B3LYP/6-311+G(d,p) | 64 |
| Dichloro 1st TS (18) B3LYP/6-311+G**                                       | 65 |
| Dichloro intermediate (19) B3LYP/6-311+G**                                 | 66 |
| 2ndTS Dichloro 2+2 side (21) B3LYP/6-311+G**                               | 66 |
| 2ndTS dichloro 4+2 side (20) B3LYP/6-311+G**                               | 67 |
| Dichloro alternative 2+2 TS (similar to 10) B3LYP/6-311+G**                | 68 |
| MP2/6-311+G** Single Point Energies of Selected B3LYP/6-311+G** Structures | 68 |
| Cyclopentadiene (1) BPW91/6-311+G**                                        | 69 |
| Diphenylketene (2) BPW91/6-311+G**                                         | 69 |
| Diphenyl 4+2 product (3) BPW91/6-311+G**                                   | 70 |
| Diphenyl 2+2 product (4) BPW91/6-311+G**                                   | 71 |
| Dichloroketene (5) BPW91/6-311+G**                                         | 72 |
| Dichloro 2+2 product (7) BPW91/6-311+G**                                   | 72 |
| Dichloro 4+2 product (8) BPW91/6-311+G**                                   | 73 |
| Diphenyl1stTS (Similar to 12) BPW91/6-311+G**                              | 74 |
| Diphenyl Intermediate (Similar to 13) BPW91/6-311+G**                      | 75 |
| Diphenyl 2 <sup>nd</sup> TS 4+2 side (Similar to 14) BPW91/6-311+G**       | 76 |
| Diphenyl 2 <sup>nd</sup> TS 2+2 side (Similar to 15) BPW91/6-311+G**       | 77 |
| Diphenyl 1 <sup>st</sup> TS 2+2 (Similar to 10) BPW91/6-311+G**            | 79 |
| Dichloro 1st TS (similar to 18) BPW91/6-311+G**                            | 80 |
| Dichloro Intermediate (similar to 19) BPW91/6-311+G**                      | 81 |
| Dichloro 2 <sup>nd</sup> TS 4+2 side (similar to 20) BPW91/6-311+G**       | 82 |
| Dichloro 2 <sup>nd</sup> TS 2+2 side (similar to 21) BPW91/6-311+G**       | 82 |
| Dichloro Alternative TS for 2+2 (similar to 10) BPW91/6-311+G**            | 83 |
| Cyclopentadiene (1) HF/6-311+G**                                           | 84 |
| Diphenylketene (2) HF/6-311+G**                                            | 84 |
| Diphenyl 4+2 product (3) HF/6-311+G**                                      | 85 |
| Diphenyl 2+2 product (4) HF/6-311+G**                                      | 86 |

|                                                                                      |     |
|--------------------------------------------------------------------------------------|-----|
| Dichloroketene (5) HF/6-311+G** .....                                                | 87  |
| Dichloro 2+2 product (7) HF/6-311+G** .....                                          | 87  |
| Dichloro 4+2 product (8) HF/6-311+G** .....                                          | 88  |
| Diphenyl 1 <sup>st</sup> TS (Similar to 9, but later) HF/6-311+G** .....             | 89  |
| Diphenyl 2 <sup>nd</sup> TS Claisen Rearrangement (Similar to 11) HF/6-311+G** ..... | 90  |
| Dichloro 1st TS (similar to 18) HF/6-311+G** .....                                   | 91  |
| Dichloro intermediate (similar to 19) HF/6-311+G** .....                             | 91  |
| Dichloro 2 <sup>nd</sup> TS 4+2 side (similar to 20) HF/6-311+G** .....              | 92  |
| Dichloro 2 <sup>nd</sup> TS 2+2 side (similar to 21) HF/6-311+G** .....              | 92  |
| Dichloro Alternative TS for 2+2 (similar to 10) HF/6-311+G** .....                   | 93  |
| TS for Claisen Rearrangment of allyl vinyl ether, mPW1K/6-31+G** .....               | 93  |
| Programs for Trajectories Calculations .....                                         | 94  |
| 1. Program progdynstarterHP .....                                                    | 94  |
| 2. Program proggenHP .....                                                           | 98  |
| 3. Program proglstpoint .....                                                        | 103 |
| 4. Program prog2ndpoint .....                                                        | 105 |
| 5. Program progdynb .....                                                            | 107 |
| 6. Program randgen .....                                                             | 109 |
| 7. Program proganal .....                                                            | 109 |
| 8. progdyn.conf .....                                                                | 110 |
| Energy Conservation in Trajectories .....                                            | 112 |
| References, including Complete Reference 46 .....                                    | 112 |

## Additional Information on Experimental Procedures

### General

Cyclopentadiene was cracked by refluxing at atmospheric pressure and stored at  $-78\text{ }^{\circ}\text{C}$  until used. Diphenylketene was prepared by a literature procedure (Taylor, E. C.; McKillop, A.; Hawks, G. H. *Organic Syntheses, Coll. Vol. 6*, p. 549; *Vol. 6*, p. 36.) starting from diphenylacetyl chloride, purchased from Acros.

### Preparation of Samples of 7 for NMR Analysis.

Adapting a literature procedure (Chen, X. -T.; Bhattacharya, S. K.; Zhou, B. Gutteridge, C. E.; Pettus, T. R. R.; Danishefsky, S. J. *J. Am. Chem. Soc.* **1999**, *121*, 6563-6579), a mixture of 0.72 g (10.9 mmol) of cyclopentadiene and 1.41 g (21.6 mmol) of zinc powder in 20 mL of ether was cooled to  $0\text{ }^{\circ}\text{C}$  and, while stirring vigorously, a solution of 1.45 mL (2.36 g, 12.9 mmol) of trichloroacetyl chloride in 8 mL of ether was added dropwise over 2 h. After stirring an additional 1 h at  $0\text{ }^{\circ}\text{C}$  and allowing to warm to  $25\text{ }^{\circ}\text{C}$  slowly, the reaction mixture was filtered through Celite 545. The filtrate was concentrated on a rotary evaporator, and the residue was taken up in ether and washed with saturated aqueous solutions of  $\text{NaHCO}_3$  and  $\text{NaCl}$ . The organic layer was dried and the solvent was removed on a rotary evaporator, and the residue was chromatographed on silica gel using 1% ether in hexanes as eluent to afford 0.85 g (44%) of 7 with no observable impurities by  $^1\text{H}$  or  $^{13}\text{C}$  NMR. In an analogous reaction on a larger scale (2.8 g of cyclopentadiene), 4.6 g (61%) of 7 was obtained.

### Preparation of Samples of 4 for NMR Analysis.

A mixture of 5.0 mL (4.9 g, 61 mmol) of cyclopentadiene and 2.02 g (8.76 mmol) of diphenylacetyl chloride in 10 mL of dichloromethane was stirred

vigorously at room temperature, while a solution of 1.5 mL (1.1 g, 11 mmol) of triethylamine was added dropwise over 30 min. After stirring an additional 1 h at room temperature, the triethylamine\*HCl was filtered away from the reaction mixture and the reaction mixture was allowed to stand overnight. The solvent was removed on a rotary evaporator, and the residue was chromatographed on silica gel using 40% dichloromethane in hexanes as eluent to afford 1.9 g (82%) of **4** with no observable impurities by  $^1\text{H}$  or  $^{13}\text{C}$  NMR. In an analogous reaction using 2.05 g of diphenylacetyl chloride, 1.6 g (69%) of **4** was obtained. The samples were recrystallized from absolute ethanol before NMR analysis.

## NMR Integration Results

Integrations for **4**.

| Sample 1                    |                                  |         |         |         |         |         | n                 |
|-----------------------------|----------------------------------|---------|---------|---------|---------|---------|-------------------|
| C4                          | 1008.42                          | 1005.38 | 1019.98 | 1025.67 | 1033.16 | 1037.26 | 6                 |
| C3                          | 1013.34                          | 1019.86 | 1029.39 | 1041.34 | 1051.17 | 1048.73 | 6                 |
| C1                          | 1000.86                          | 999.59  | 1016.64 | 1025.73 | 1036.52 | 1030.6  | 6                 |
| C2                          | 1000                             | 1001.08 | 1014.09 | 1024.38 | 1025.4  | 1031.5  | 6                 |
| $^{13}\text{C}$ integration | C2/(C3*0.9893)                   |         |         |         |         |         |                   |
| Ratio Corrected             | C1/(C4*0.9893)                   |         |         |         |         |         | AVE               |
| C2/C3                       | 0.998                            | 0.992   | 0.996   | 0.994   | 0.986   | 0.994   | <b>0.993</b>      |
| C1/C4                       | 1.003                            | 1.005   | 1.008   | 1.011   | 1.014   | 1.004   | <b>1.008</b>      |
|                             |                                  |         |         |         |         |         | 95%<br>Confidence |
|                             |                                  |         |         |         |         |         | <b>0.004</b>      |
|                             |                                  |         |         |         |         |         | <b>0.004</b>      |
| corrected KIE               | (C3*0.9893)/C2<br>(C4*0.9893)/C1 |         |         |         |         |         | AVE               |
| 3/2                         | 1.002                            | 1.008   | 1.004   | 1.006   | 1.014   | 1.006   | <b>1.007</b>      |
| 4/1                         | 0.997                            | 0.995   | 0.993   | 0.989   | 0.986   | 0.996   | <b>0.993</b>      |
|                             |                                  |         |         |         |         |         | 95%<br>Confidence |
|                             |                                  |         |         |         |         |         | <b>0.004</b>      |
|                             |                                  |         |         |         |         |         | <b>0.004</b>      |
| Sample 2                    |                                  |         |         |         |         |         | n                 |
| C4                          | 1007.71                          | 1020.6  | 1027.77 | 1036.77 | 1038.43 | 1056.08 | 6                 |
| C3                          | 1011.54                          | 1028.26 | 1044.22 | 1044.25 | 1048.57 | 1071.78 | 6                 |
| C1                          | 1002.04                          | 1011.3  | 1018.33 | 1029.81 | 1037.88 | 1052.67 | 6                 |
| C2                          | 1000                             | 1012.18 | 1022.95 | 1028.02 | 1034.27 | 1043.86 | 6                 |
| $^{13}\text{C}$ integration | C2/(C3*0.9893)                   |         |         |         |         |         |                   |
| Ratio Corrected             | C1/(C4*0.9893)                   |         |         |         |         |         | AVE               |
| C2/C3                       | 0.999                            | 0.995   | 0.990   | 0.995   | 0.997   | 0.984   | <b>0.994</b>      |
| C1/C4                       | 1.005                            | 1.002   | 1.002   | 1.004   | 1.010   | 1.008   | <b>1.005</b>      |
|                             |                                  |         |         |         |         |         | 95%<br>Confidence |
|                             |                                  |         |         |         |         |         | <b>0.005</b>      |
|                             |                                  |         |         |         |         |         | <b>0.003</b>      |
| corrected KIE               | (C3*0.9893)/C2<br>(C4*0.9893)/C1 |         |         |         |         |         | AVE               |
| 3/2                         | 1.001                            | 1.005   | 1.010   | 1.005   | 1.003   | 1.016   | <b>1.007</b>      |
| 4/1                         | 0.995                            | 0.998   | 0.998   | 0.996   | 0.990   | 0.993   | <b>0.995</b>      |

95%  
Confidence  
**0.005**  
**0.003**

## Integrations for 7.

| <b>Sample 1</b>                                |                                  |         |         |         |         |         |                                                   |
|------------------------------------------------|----------------------------------|---------|---------|---------|---------|---------|---------------------------------------------------|
| C4                                             | 1000                             | 1000    | 1000    | 1000    | 1000    | 1000    | 6                                                 |
| C3                                             | 996.706                          | 996.772 | 999.673 | 993.601 | 997.263 | 999.168 | 6                                                 |
| C2                                             | 987.714                          | 985.488 | 989.353 | 984.185 | 985.12  | 987.938 | 6                                                 |
| C1                                             | 966.558                          | 969.878 | 972.584 | 965.399 | 967.001 | 969.209 | 6                                                 |
| <sup>13</sup> C integration<br>Ratio Corrected | C2/(C3*0.9893)<br>C1/(C4*0.9893) |         |         |         |         |         | AVE                                               |
| C1/C4                                          | 0.977                            | 0.980   | 0.983   | 0.976   | 0.977   | 0.980   | <b>0.979</b>                                      |
| C2/C3                                          | 1.002                            | 0.999   | 1.000   | 1.001   | 0.999   | 0.999   | <b>1.000</b>                                      |
|                                                |                                  |         |         |         |         |         | 95%<br>Confidence<br><b>0.003</b><br><b>0.001</b> |
| corrected KIE                                  | (C3*0.9893)/C2<br>(C4*0.9893)/C1 |         |         |         |         |         | AVE                                               |
| 3/2                                            | 1.024                            | 1.020   | 1.017   | 1.025   | 1.023   | 1.021   | <b>1.022</b>                                      |
| 4/1                                            | 0.998                            | 1.001   | 1.000   | 0.999   | 1.001   | 1.001   | <b>1.000</b>                                      |
|                                                |                                  |         |         |         |         |         | 95%<br>Confidence<br><b>0.003</b><br><b>0.001</b> |
| <b>Rxn 2</b>                                   |                                  |         |         |         |         |         |                                                   |
| C4                                             | 1000                             | 1000    | 1000    | 1000    | 1000    | 1000    | n<br>12                                           |
| C3                                             | 997.478                          | 997.805 | 999.852 | 1003.94 | 994.902 | 998.586 | 12                                                |
|                                                | 999.975                          | 1002.44 | 996.527 | 1000.38 | 990.588 | 989.902 |                                                   |
| C2                                             | 989.825                          | 990.475 | 992.592 | 990.563 | 986.388 | 990.934 | 12                                                |
|                                                | 983.275                          | 987.793 | 987.5   | 988.927 | 975.765 | 978.574 |                                                   |
| C1                                             | 968.714                          | 972.596 | 972.711 | 974.757 | 968.05  | 972.618 | 12                                                |
|                                                | 970.01                           | 977.903 | 966.06  | 969.705 | 965.733 | 959.586 |                                                   |
| <sup>13</sup> C integration<br>Ratio Corrected | C2/(C3*0.9893)<br>C1/(C4*0.9893) |         |         |         |         |         | AVE                                               |
| C1/C4                                          | 0.979                            | 0.983   | 0.983   | 0.985   | 0.979   | 0.983   | <b>0.980</b>                                      |
|                                                | 0.981                            | 0.988   | 0.977   | 0.980   | 0.976   | 0.970   |                                                   |
| C2/C3                                          | 1.003                            | 1.003   | 1.003   | 0.997   | 1.002   | 1.003   | <b>1.000</b>                                      |
|                                                | 0.994                            | 0.996   | 1.002   | 0.999   | 0.996   | 0.999   |                                                   |
|                                                |                                  |         |         |         |         |         | 95%<br>Confidence<br><b>0.003</b><br><b>0.002</b> |
| corrected KIE                                  | (C3*0.9893)/C2<br>(C4*0.9893)/C1 |         |         |         |         |         | AVE                                               |
| 4/1                                            | 1.021                            | 1.017   | 1.017   | 1.015   | 1.022   | 1.017   | <b>1.020</b>                                      |
|                                                | 1.020                            | 1.012   | 1.024   | 1.020   | 1.024   | 1.031   |                                                   |

|     |       |       |       |       |       |       |                   |
|-----|-------|-------|-------|-------|-------|-------|-------------------|
| 3/2 | 0.997 | 0.997 | 0.997 | 1.003 | 0.998 | 0.997 | <b>1.000</b>      |
|     | 1.006 | 1.004 | 0.998 | 1.001 | 1.004 | 1.001 |                   |
|     |       |       |       |       |       |       | 95%<br>Confidence |
|     |       |       |       |       |       |       | <b>0.003</b>      |
|     |       |       |       |       |       |       | <b>0.002</b>      |

### ***<sup>13</sup>C NMR Spectra of 4 and 7***

Spectrum of 4

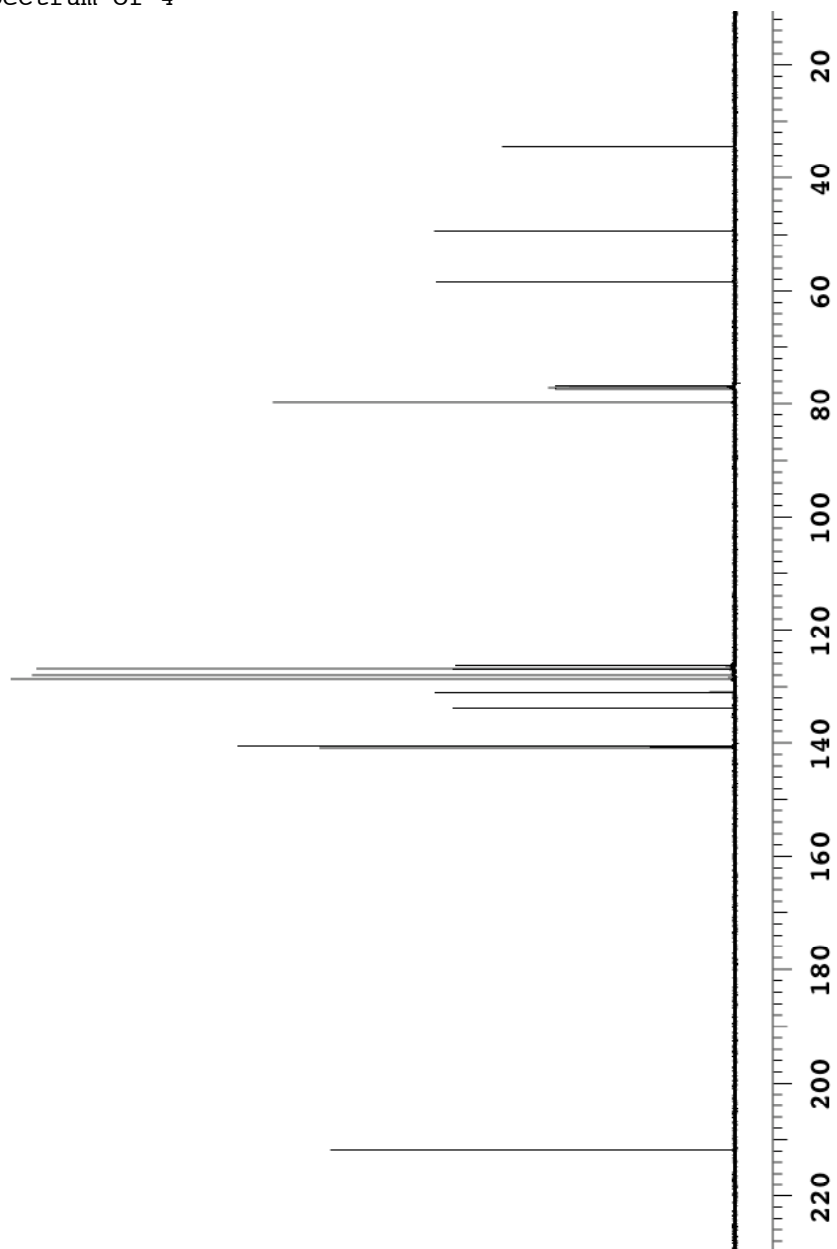

Spectrum of 7

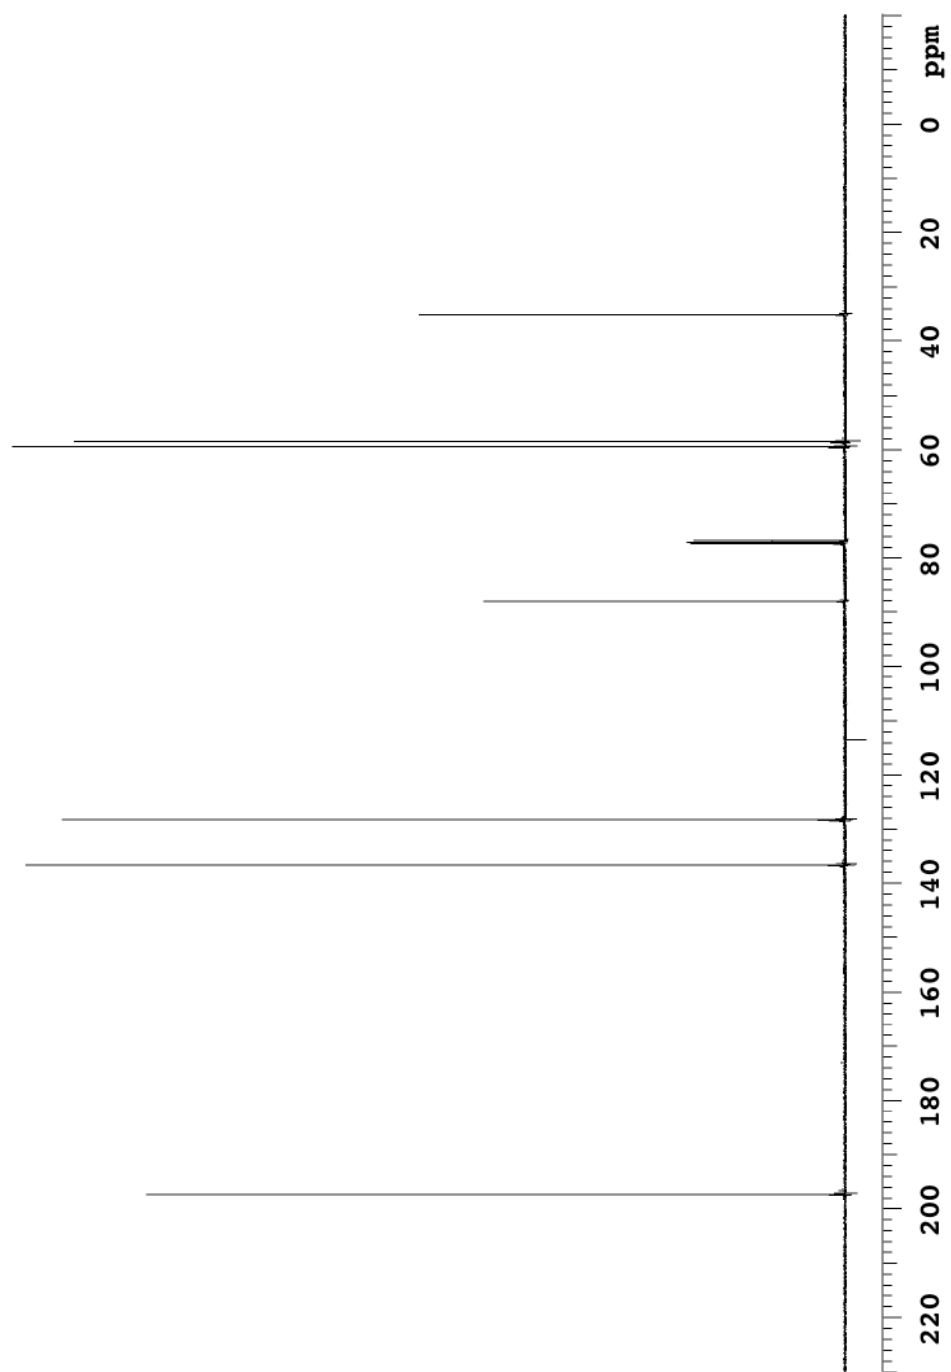

## Kinetic Simulations

### No-Cycloreversion Model

The observed compositions were fit to possible kinetic schemes using Excel spreadsheets. Shown below is the critical part of a spreadsheet that simulates a composition data set without any reversion of **3** to **1 + 2**.

Footnotes give the key formulas. The fit produced by this simulation is shown in Figure 2 in the main text.

|           | <b>A</b>                      | <b>B</b>           | <b>C</b>                 | <b>D</b>                 | <b>E</b>                 | <b>F</b>                 | <b>G</b>          |
|-----------|-------------------------------|--------------------|--------------------------|--------------------------|--------------------------|--------------------------|-------------------|
| <b>1</b>  |                               |                    |                          |                          |                          | 2+2                      | Total             |
|           |                               | time (h)           | ketene                   | CP                       | 4+2 (pred)               | (pred)                   | Check             |
| <b>2</b>  | k total for the cycloaddition | 0.000              | <b>0.032<sup>j</sup></b> | <b>0.550<sup>j</sup></b> | <b>0.002<sup>j</sup></b> | <b>0.001<sup>j</sup></b> | 0.59              |
| <b>3</b>  | 0.00050 <sup>a</sup>          | 0.024 <sup>d</sup> | 0.031 <sup>e</sup>       | 0.549 <sup>f</sup>       | 0.003 <sup>g</sup>       | 0.001 <sup>h</sup>       | 0.59 <sup>i</sup> |
| <b>4</b>  | Proportion initial 4+2        | 0.049              | 0.030                    | 0.548                    | 0.003                    | 0.001                    | 0.59              |
| <b>5</b>  | 0.828 <sup>a</sup>            | 0.073              | 0.030                    | 0.548                    | 0.004                    | 0.001                    | 0.59              |
| <b>6</b>  | k for 4+2                     | 0.098              | 0.029                    | 0.547                    | 0.005                    | 0.001                    | 0.59              |
| <b>7</b>  | 0.000414 <sup>b</sup>         | 0.122              | 0.028                    | 0.546                    | 0.005                    | 0.001                    | 0.59              |
| <b>8</b>  | k 2+2                         | 0.147              | 0.027                    | 0.546                    | 0.006                    | 0.002                    | 0.59              |
| <b>9</b>  | 0.000086 <sup>c</sup>         | 0.171              | 0.027                    | 0.545                    | 0.006                    | 0.002                    | 0.59              |
| <b>10</b> | k rearr                       | 0.196              | 0.026                    | 0.544                    | 0.007                    | 0.002                    | 0.59              |
| <b>11</b> | 0.000029 <sup>a</sup>         | 0.220              | 0.026                    | 0.544                    | 0.007                    | 0.002                    | 0.59              |
| <b>12</b> | Timestep (s)                  | 0.244              | 0.025                    | 0.543                    | 0.008                    | 0.002                    | 0.59              |
| <b>13</b> | 88                            | 0.269              | 0.024                    | 0.543                    | 0.008                    | 0.002                    | 0.59              |

<sup>a</sup>Parameter adjusted for fit. <sup>b</sup>Formula:=A3\*A5 <sup>c</sup>Formula:=(1-A5)\*A3

<sup>d</sup>Formula:=B2+\$A\$13/3600 <sup>e</sup>Formula:=C2-\$A\$13\*\$A\$3\*C2\*D2 <sup>f</sup>Formula:=D2-

\$A\$13\*\$A\$3\*C2\*D2 <sup>g</sup>Formula:=E2+\$A\$13\*\$A\$7\*C2\*D2-\$A\$13\*\$A\$11\*E2

<sup>h</sup>Formula:=F2+\$A\$13\*\$A\$9\*C2\*D2+\$A\$13\*\$A\$11\*E2 <sup>i</sup>Formula:=C3+D3+2\*E3+2\*F3

<sup>j</sup>Experimental parameter

### Cycloreversion Model

Shown below is the critical part of a spreadsheet that simulates a composition data set. In this spreadsheet, the conversion of **3** to **4** occurs entirely by cycloreversion of **3** to **1 + 2**. Footnotes give the key formulas.

The fit produced by this simulation is shown below the table. To get the 2+2 product at a long-time rate similar to what is observed, the rate of the cycloreversion has to be set very high. To then get the 4+2 product to build up near what is observed, the cycloaddition rate constant has to be raised. This lead to qualitative error in the early points.

|          | <b>A</b>                      | <b>B</b>           | <b>C</b>                 | <b>D</b>                 | <b>E</b>                 | <b>F</b>                 | <b>G</b>          |
|----------|-------------------------------|--------------------|--------------------------|--------------------------|--------------------------|--------------------------|-------------------|
| <b>1</b> |                               |                    |                          |                          |                          | 2+2                      | Total             |
|          |                               | time (h)           | ketene                   | CP                       | 4+2 (pred)               | (pred)                   | Check             |
| <b>2</b> | k total for the cycloaddition | 0.000              | <b>0.032<sup>j</sup></b> | <b>0.550<sup>j</sup></b> | <b>0.002<sup>j</sup></b> | <b>0.001<sup>j</sup></b> | 0.59              |
| <b>3</b> | 0.0014 <sup>a</sup>           | 0.012 <sup>d</sup> | 0.031 <sup>e</sup>       | 0.549 <sup>f</sup>       | 0.003 <sup>g</sup>       | 0.001 <sup>h</sup>       | 0.59 <sup>i</sup> |
| <b>4</b> | Proportion initial 4+2        | 0.024              | 0.030                    | 0.548                    | 0.004                    | 0.001                    | 0.59              |
| <b>5</b> | 0.75 <sup>a</sup>             | 0.037              | 0.029                    | 0.547                    | 0.005                    | 0.001                    | 0.59              |



|           |                      |       |       |       |       |       |      |
|-----------|----------------------|-------|-------|-------|-------|-------|------|
| <b>6</b>  | k for 4+2            | 0.049 | 0.028 | 0.546 | 0.006 | 0.001 | 0.59 |
| <b>7</b>  | 0.00105 <sup>b</sup> | 0.061 | 0.027 | 0.545 | 0.006 | 0.001 | 0.59 |
| <b>8</b>  | k 2+2                | 0.073 | 0.026 | 0.545 | 0.007 | 0.001 | 0.59 |
| <b>9</b>  | 0.00035 <sup>c</sup> | 0.086 | 0.026 | 0.544 | 0.008 | 0.001 | 0.59 |
| <b>10</b> | k cycloreversion     | 0.098 | 0.025 | 0.543 | 0.008 | 0.002 | 0.59 |
| <b>11</b> | 0.00011 <sup>a</sup> | 0.110 | 0.024 | 0.543 | 0.009 | 0.002 | 0.59 |
| <b>12</b> | Timestep (s)         | 0.122 | 0.024 | 0.542 | 0.009 | 0.002 | 0.59 |
| <b>13</b> | 44                   | 0.134 | 0.023 | 0.541 | 0.010 | 0.002 | 0.59 |

<sup>a</sup>Parameter adjusted for fit. <sup>b</sup>Formula:=A3\*A5 <sup>c</sup>Formula:=(1-A5)\*A3

<sup>d</sup>Formula:=B2+\$A\$13/3600 <sup>e</sup>Formula:=C2-(\$A\$13\*\$A\$3\*C2\*D2)+(\$A\$13\*\$A\$11\*E2)

<sup>f</sup>Formula:=D2--(\$A\$13\*\$A\$3\*C2\*D2)+(\$A\$13\*\$A\$11\*E2)

<sup>g</sup>Formula:=E2+(\$A\$13\*\$A\$7\*C2\*D2)-(\$A\$13\*\$A\$11\*E2)

<sup>h</sup>Formula:=F2+\$A\$21\*\$A\$9\*C2\*D2 <sup>i</sup>Formula:=C3+D3+2\*E3+2\*F3 <sup>j</sup>Experimental parameter

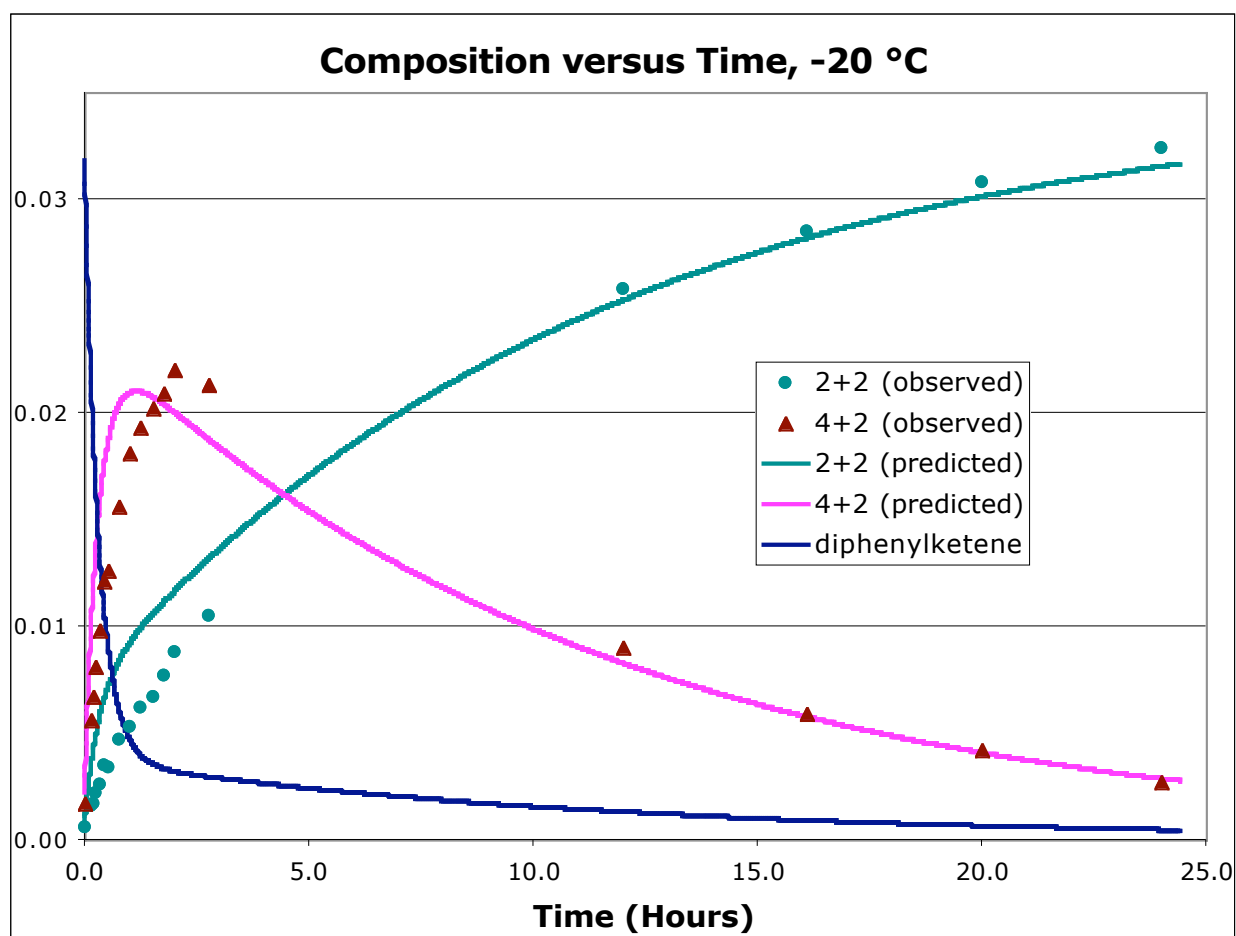

Expansion of Early Points:

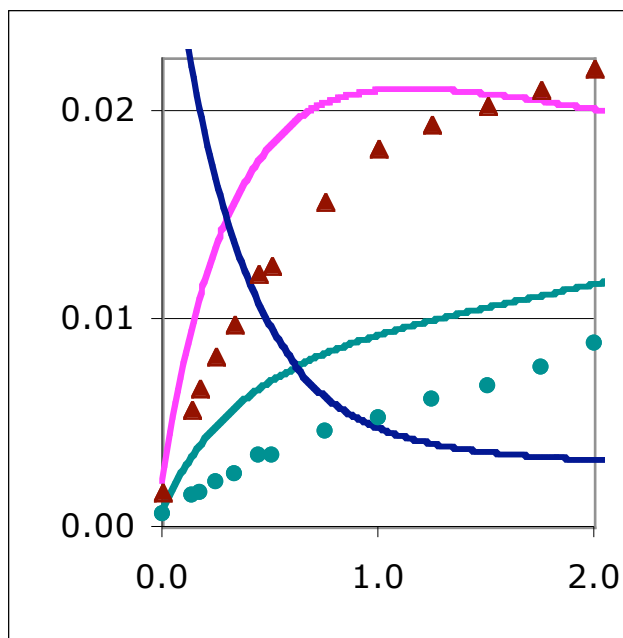

### Mixed Model

Shown below is the critical part of a best-fit spreadsheet that simulates a composition data set. In this spreadsheet, the conversion of **3** to **4** occurs partially directly and partially by cycloreversion of **3** to **1 + 2**. Footnotes give the key formulas. The fit produced by this simulation is shown below the table. This is not best-fit – better fits are obtained with higher  $k$ 's for rearrangement than  $k$  for cycloreversion.

|           | <b>A</b>                      | <b>B</b>           | <b>C</b>                 | <b>D</b>                 | <b>E</b>                 | <b>F</b>                 | <b>G</b>          |
|-----------|-------------------------------|--------------------|--------------------------|--------------------------|--------------------------|--------------------------|-------------------|
| <b>1</b>  |                               | time (h)           | ketene                   | CP                       | 4+2 (pred)               | 2+2 (pred)               | Total Check       |
| <b>2</b>  | k total for the cycloaddition | 0.000              | <b>0.032<sup>j</sup></b> | <b>0.550<sup>j</sup></b> | <b>0.002<sup>j</sup></b> | <b>0.001<sup>j</sup></b> | 0.59              |
| <b>3</b>  | 0.00066 <sup>a</sup>          | 0.012 <sup>d</sup> | 0.031 <sup>e</sup>       | 0.549 <sup>f</sup>       | 0.003 <sup>g</sup>       | 0.001 <sup>h</sup>       | 0.59 <sup>i</sup> |
| <b>4</b>  | Proportion initial 4+2        | 0.024              | 0.031                    | 0.549                    | 0.003                    | 0.001                    | 0.59              |
| <b>5</b>  | 0.8 <sup>a</sup>              | 0.037              | 0.030                    | 0.549                    | 0.003                    | 0.001                    | 0.59              |
| <b>6</b>  | k for 4+2                     | 0.049              | 0.030                    | 0.548                    | 0.004                    | 0.001                    | 0.59              |
| <b>7</b>  | 0.000528 <sup>b</sup>         | 0.061              | 0.029                    | 0.548                    | 0.004                    | 0.001                    | 0.59              |
| <b>8</b>  | k 2+2                         | 0.073              | 0.029                    | 0.547                    | 0.004                    | 0.001                    | 0.59              |
| <b>9</b>  | 0.000132 <sup>c</sup>         | 0.086              | 0.028                    | 0.547                    | 0.005                    | 0.002                    | 0.59              |
| <b>10</b> | k rearr                       | 0.098              | 0.028                    | 0.546                    | 0.005                    | 0.002                    | 0.59              |
| <b>11</b> | 0.000024                      | 0.110              | 0.028                    | 0.546                    | 0.006                    | 0.002                    | 0.59              |
| <b>12</b> | k cycloreversion              | 0.122              | 0.027                    | 0.545                    | 0.006                    | 0.002                    | 0.59              |
| <b>13</b> | 0.00024                       | 0.134              | 0.027                    | 0.545                    | 0.006                    | 0.002                    | 0.59              |
| <b>14</b> | Timestep (s)                  | 0.147              | 0.026                    | 0.544                    | 0.007                    | 0.002                    | 0.59              |
| <b>15</b> | 88                            | 0.159              | 0.026                    | 0.544                    | 0.007                    | 0.002                    | 0.59              |

<sup>a</sup>Parameter adjusted for fit.

<sup>b</sup>Formula:=A3\*A5

<sup>c</sup>Formula:=(1-A5)\*A3

<sup>d</sup>Formula:=B2+\$A\$13/3600

<sup>e</sup>Formula:=C2-(\$A\$15\*\$A\$3\*C2\*D2)+(\$A\$15\*\$A\$13\*E2)

<sup>f</sup>Formula:=D2-(\$A\$15\*\$A\$3\*C2\*D2)+(\$A\$15\*\$A\$13\*E2)

<sup>g</sup>Formula:=E2+(\$A\$15\*\$A\$7\*C2\*D2)-(\$A\$15\*\$A\$11\*E2)-(\$A\$15\*\$A\$13\*E2)

<sup>h</sup>Formula:=F2+\$A\$15\*\$A\$9\*C2\*D2+\$A\$15\*\$A\$11\*E2

<sup>i</sup>Formula:=C3+D3+2\*E3+2\*F3

<sup>j</sup>Experimental parameter

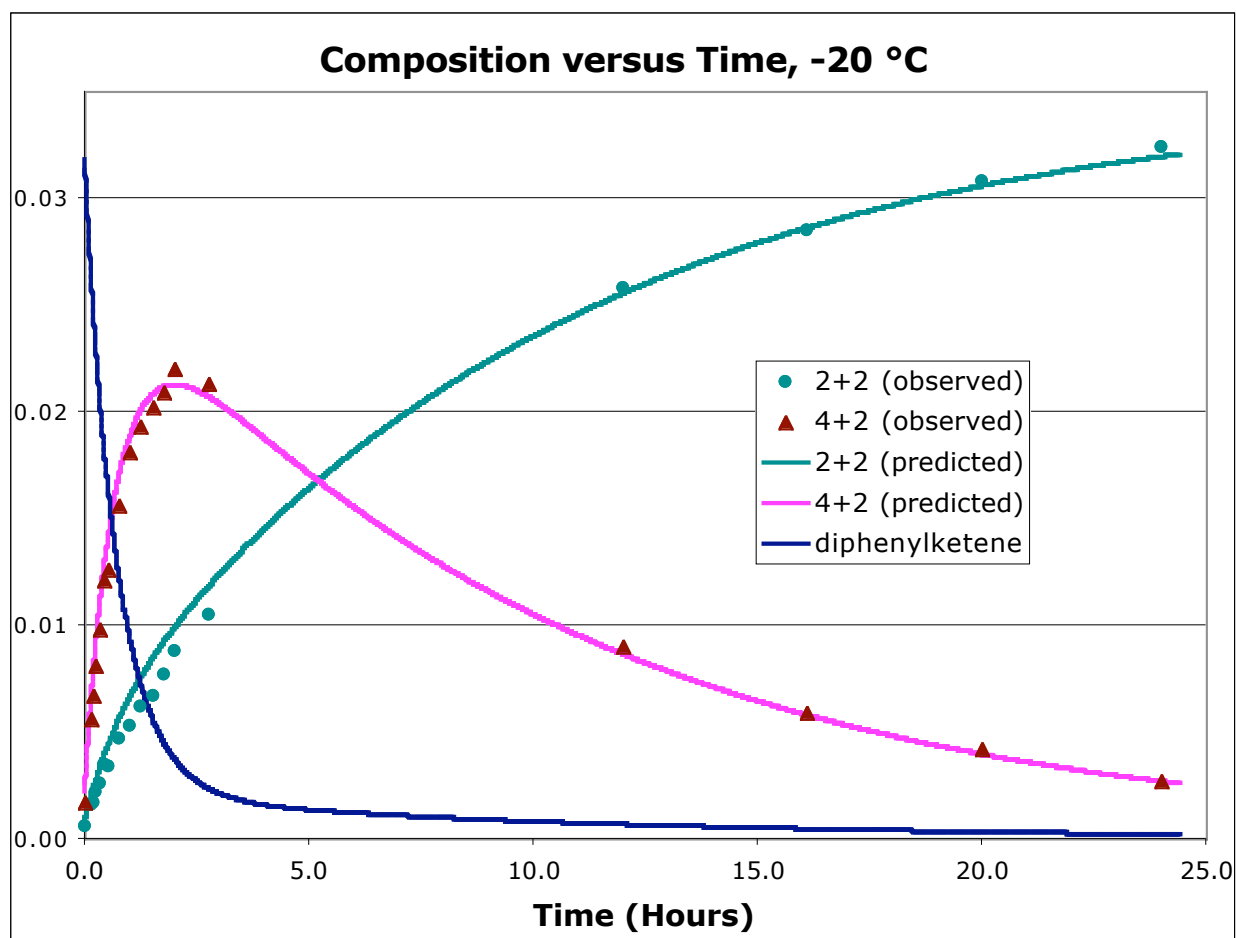

Expansion of Early Points:

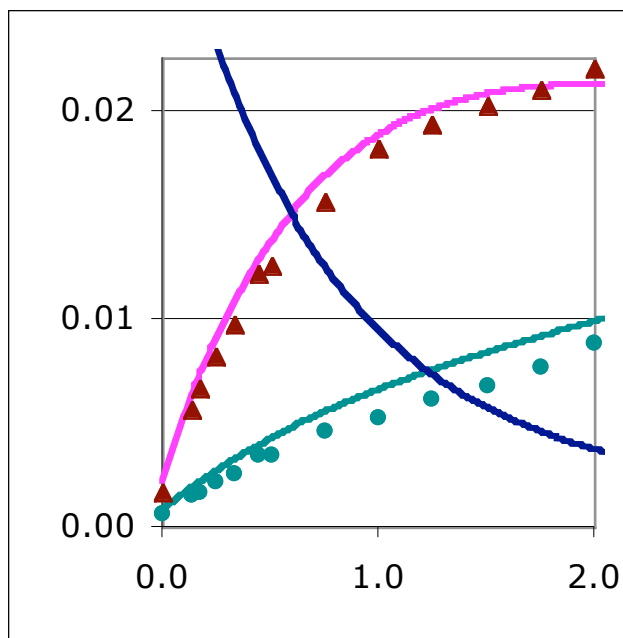

## Theoretical Results

The structures and energies for all stationary points were obtained using Gaussian 98<sup>1</sup> or Gaussian 03.<sup>2</sup> All mPW1K results were obtained with Gaussian 03. Vibrational frequency analyses were carried out on all stationary points. Reaction paths were determined in two ways, either using the IRC algorithm in Gaussian 03 (when it could be successfully applied) or using a home-grown implementation of a damped classical trajectory algorithm (see: Hratchian, H. P.; Schlegel, H. B. *J. Phys. Chem. A.* **2002**, *106*, 165-169).

### ***Comment on BPW91 and HF results.***

The tables and structures below include structures and pathways determined in BPW91/6-311+G\*\* and HF/6-311+G\*\* calculations. The BPW91 results may be described as resembling the B3LYP results in many ways, including the severe error in the diphenylketene reaction thermodynamics. The BPW91 Claisen transition structure is still far too loose versus high-level calculations or isotope effects. The HF results may be described as roughly resembling the mPW1K results, except for the expected overestimation of activation barriers and presence of an interesting shallow intermediate in the dichloroketene reaction.

### ***Tables of Energies***

#### **Potential Energy and Potential Energy + zpe**

| Potential E | Erel | E + zpe | Erel | G (298) |
|-------------|------|---------|------|---------|
|-------------|------|---------|------|---------|

|                                           |                 |              |              |              |              |
|-------------------------------------------|-----------------|--------------|--------------|--------------|--------------|
| mPW1K/6-31G*                              |                 |              |              |              |              |
| Cyclopentadiene (1)                       | -194.050307777  |              | -193.954450  |              | -193.980996  |
| diphenylketene (2)                        | -614.526857967  |              | -614.324131  |              | -614.363761  |
| 4+2_prod (3)                              | -808.608985300  | <b>-20.0</b> | -808.302749  | <b>-15.2</b> | -808.346343  |
| 2+2_prod (4)                              | -808.621789989  | <b>-28.0</b> | -808.316983  | <b>-24.1</b> | -808.361051  |
| Dichloroketene (5)                        | -1071.716713780 |              | -1071.700377 |              | -1071.730027 |
| Dichloro 2+2 product (7)                  | -1265.842698670 | <b>-47.5</b> | -1265.724480 | <b>-43.7</b> | -1265.758978 |
| Dichloro 4+2 product (8)                  | -1265.820221460 | <b>-33.4</b> | -1265.700386 | <b>-28.6</b> | -1265.734438 |
| TS 2+2 (10)                               | -808.538528206  | <b>24.2</b>  | -808.238067  | <b>25.4</b>  | -808.282664  |
| 1st_TS (9)                                | -808.558070111  | <b>12.0</b>  | -808.257180  | <b>13.4</b>  | -808.301799  |
| 2nd TS rearrangement (11)                 | -808.561774659  | <b>9.7</b>   | -808.259142  | <b>12.2</b>  | -808.302256  |
| Dichloro 1st TS (16)                      | -1265.762969030 | <b>2.5</b>   | -1265.648879 | <b>3.7</b>   | -1265.684413 |
| 2nd TS rearrangement (17)                 | -1265.772099100 | <b>-3.2</b>  | -1265.655971 | <b>-0.7</b>  | -1265.690186 |
| Dichloro 2+2 TS (Similar to 10)           | -1265.741809640 | <b>15.8</b>  | -1265.627834 | <b>16.9</b>  | -1265.664257 |
| mPW1K/6-31+G**                            |                 |              |              |              |              |
| Cyclopentadiene (1)                       | -194.065760414  |              | -193.970385  |              | -193.996940  |
| diphenylketene (2)                        | -614.557526647  |              | -614.355495  |              | -614.395272  |
| 4+2_product (3)                           | -808.651513331  | <b>-17.7</b> | -808.346518  | <b>-13.0</b> | -808.390383  |
| 2+2_product (4)                           | -808.664448064  | <b>-25.8</b> | -808.360974  | <b>-22.0</b> | -808.405385  |
| Dichloroketene (5)                        | -1071.721742340 |              | -1071.705471 |              | -1071.735130 |
| Dichloro 2+2 product (7)                  | -1265.860343000 | <b>-45.7</b> | -1265.742708 | <b>-42.0</b> | -1265.777245 |
| Dichloro 4+2 product (8)                  | -1265.837146340 | <b>-31.2</b> | -1265.717873 | <b>-26.4</b> | -1265.751940 |
| TS_2+2 (10)                               | -808.583348892  | <b>25.1</b>  | -808.284112  | <b>26.2</b>  | -808.328798  |
| 1st_TS (9)                                | -808.602438424  | <b>13.1</b>  | -808.302844  | <b>14.5</b>  | -808.347433  |
| 2ndTS_rearrangement (11)                  | -808.605862818  | <b>10.9</b>  | -808.304564  | <b>13.4</b>  | -808.347346  |
| Dichloro 1st TS (16)                      | -1265.781454000 | <b>3.8</b>   | -1265.668023 | <b>4.9</b>   | -1265.703649 |
| Dichloro 2nd TS rearrangement (17)        | -1265.790921280 | <b>-2.1</b>  | -1265.675367 | <b>0.3</b>   | -1265.709641 |
| Dichloro 2+2 TS (similar to 10)           | -1265.761164150 | <b>16.5</b>  | -1265.647917 | <b>17.5</b>  | -1265.684532 |
| B3LYP/6-31G*                              |                 |              |              |              |              |
| Cyclopentadiene (1)                       | -194.101058102  |              | -194.008164  |              | -194.034761  |
| Diphenylketene (2)                        | -614.708265406  |              | -614.511947  |              | -614.551798  |
| 4+2 Product (3)                           | -808.819403440  | <b>-6.3</b>  | -808.523103  | <b>-1.9</b>  | -808.567031  |
| 2+2 Product (4)                           | -808.830818866  | <b>-13.5</b> | -808.535792  | <b>-9.8</b>  | -808.580059  |
| Dichloroketene (5)                        | -1071.760365880 |              | -1071.744999 |              | -1071.774829 |
| Dichloro 2+2 product (7)                  | -1265.915221090 | <b>-33.8</b> | -1265.801424 | <b>-30.3</b> | -1265.836230 |
| Dichloro 4+2 Product (8)                  | -1265.892485500 | <b>-19.5</b> | -1265.777132 | <b>-15.0</b> | -1265.811431 |
| 1st_TS (12)                               | -808.787217876  | <b>13.9</b>  | -808.495703  | <b>15.3</b>  | -808.540667  |
| Intermediate (13)                         | -808.789092427  | <b>12.7</b>  | -808.496142  | <b>15.0</b>  | -808.541268  |
| 2ndTS giving 4+2 (14)                     | -808.788846278  | <b>12.8</b>  | -808.495873  | <b>15.2</b>  | -808.540077  |
| 2ndTS giving 2+2 (15)                     | -808.788042815  | <b>13.4</b>  | -808.494911  | <b>15.8</b>  | -808.537909  |
| Another TS that gives 2+2 (Similar to 10) | -808.770273763  | <b>24.5</b>  | -808.479244  | <b>25.6</b>  | -808.524309  |

|                                                         |                 |              |              |              |              |
|---------------------------------------------------------|-----------------|--------------|--------------|--------------|--------------|
| Dichloro 1st TS (18)                                    | -1265.854881750 | <b>4.1</b>   | -1265.744640 | <b>5.3</b>   | -1265.780450 |
| Dichloro intermediate (19)                              | -1265.861418050 | <b>0.0</b>   | -1265.749446 | <b>2.3</b>   | -1265.785253 |
| 2nd TS Dichloro 2+2 side (20)                           | -1265.861232530 | <b>0.1</b>   | -1265.749224 | <b>2.5</b>   | -1265.783310 |
| 2nd TS Dichloro 4+2 side (21)                           | -1265.860844770 | <b>0.4</b>   | -1265.748726 | <b>2.8</b>   | -1265.783246 |
| Dichloro 2+2 TS (Similar to 10)                         | -1265.835627950 | <b>16.2</b>  | -1265.725699 | <b>17.2</b>  | -1265.762263 |
| B3LYP/6-311+G**                                         |                 |              |              |              |              |
| cyclopentadiene (1)                                     | -194.156236414  |              | -194.064126  |              | -194.090725  |
| diphenylketene (2)                                      | -614.869297097  |              | -614.674116  |              | -614.714171  |
| 4+2_product (3)                                         | -809.023654094  | <b>1.2</b>   | -808.729490  | <b>5.5</b>   | -808.773750  |
| 2+2_product (4)                                         | -809.037029631  | <b>-7.2</b>  | -808.744159  | <b>-3.7</b>  | -808.788779  |
| Dichloroketene (5)                                      | -1071.865777450 |              | -1071.850429 |              | -1071.880238 |
| Dichloro 2+2 product (7)                                | -1266.067460330 | <b>-28.5</b> | -1265.954595 | <b>-25.1</b> | -1265.989436 |
| Dichloro 4+2 product (8)                                | -1266.041363820 | <b>-12.1</b> | -1265.926972 | <b>-7.8</b>  | -1265.961298 |
| 1st_TS (12)                                             | -808.996933374  | <b>17.9</b>  | -808.707432  | <b>19.3</b>  | -808.752238  |
| intermediate (13)                                       | -808.997346724  | <b>17.7</b>  | -808.706886  | <b>19.7</b>  | -808.752209  |
| 2ndTS giving 4+2 (14)                                   | -808.996569616  | <b>18.2</b>  | -808.705647  | <b>20.5</b>  | -808.749828  |
| 2ndTS giving 2+2 (15)                                   | -808.995562396  | <b>18.8</b>  | -808.704693  | <b>21.1</b>  | -808.747885  |
| Another diphenyl TS giving 2+2 directly (Similar to 10) | -808.979959514  | <b>28.6</b>  | -808.691026  | <b>29.6</b>  | -808.736305  |
| Dichloro 1st TS (18)                                    | -1266.010313000 | <b>7.3</b>   | -1265.900988 | <b>8.5</b>   | -1265.936744 |
| Dichloro intermediate (19)                              | -1266.015030500 | <b>4.4</b>   | -1265.904132 | <b>6.5</b>   | -1265.939927 |
| 2ndTS Dichloro 2+2 side (21)                            | -1266.014687290 | <b>4.6</b>   | -1265.903693 | <b>6.8</b>   | -1265.937815 |
| 2ndTS dichloro 4+2 side (20)                            | -1266.013422600 | <b>5.4</b>   | -1265.902197 | <b>7.8</b>   | -1265.936736 |
| Dichloro alternative 2+2 TS (similar to 10)             | -1265.991338390 | <b>19.2</b>  | -1265.882385 | <b>20.2</b>  | -1265.918977 |
| BPW91/6-311+G**                                         |                 |              |              |              |              |
| Cyclopentadiene (1)                                     | -194.124726721  |              | -194.034928  |              | -194.061585  |
| Diphenylketene (2)                                      | -614.791014352  |              | -614.600856  |              | -614.641339  |
| Diphenyl 4+2 product (3)                                | -808.916083578  | <b>-0.2</b>  | -808.629552  | <b>3.9</b>   | -808.674421  |
| Diphenyl 2+2 product (4)                                | -808.927937172  | <b>-7.7</b>  | -808.642767  | <b>-4.4</b>  | -808.687877  |
| Dichloroketene (5)                                      | -1071.858726040 |              | -1071.843900 |              | -1071.873817 |
| Dichloro 2+2 product (7)                                | -1266.030602750 | <b>-29.6</b> | -1265.920905 | <b>-26.4</b> | -1265.956006 |
| Dichloro 4+2 product (8)                                | -1266.005108460 | <b>-13.6</b> | -1265.893848 | <b>-9.4</b>  | -1265.928390 |
| Diphenyl1stTS (Similar to 12)                           | -808.894967419  | <b>13.0</b>  | -808.613096  | <b>14.2</b>  | -808.658579  |
| Diphenyl Intermediate (Similar to 13)                   | -808.897582358  | <b>11.4</b>  | -808.614400  | <b>13.4</b>  | -808.660052  |
| Diphenyl 2nd TS 4+2 side (Similar to 14)                | -808.896852932  | <b>11.9</b>  | -808.613239  | <b>14.1</b>  | -808.657779  |
| Diphenyl 2nd TS 2+2 side (Similar to 15)                | -808.894947929  | <b>13.0</b>  | -808.611575  | <b>15.2</b>  | -808.655205  |
| Diphenyl 1st TS 2+2 (Similar to 10)                     | -808.880726010  | <b>22.0</b>  | -808.599118  | <b>23.0</b>  | -808.644631  |
| Dichloro 1st TS (similar to 18)                         | -1265.977035880 | <b>4.0</b>   | -1265.870947 | <b>4.9</b>   | -1265.907499 |
| Dichloro Intermediate (similar to 19)                   | -1265.987333580 | <b>-2.4</b>  | -1265.879295 | <b>-0.3</b>  | -1265.915229 |
| Dichloro 2nd TS 4+2 side (similar to 20)                | -1265.985259150 | <b>-1.1</b>  | -1265.876743 | <b>1.3</b>   | -1265.911356 |

|                                                       |                 |              |              |              |              |
|-------------------------------------------------------|-----------------|--------------|--------------|--------------|--------------|
| Dichloro 2nd TS 2+2 side (similar to 21)              | -1265.986706430 | <b>-2.0</b>  | -1265.878631 | <b>0.1</b>   | -1265.912913 |
| Dichloro Alternative TS for 2+2 (similar to 10)       | -1265.961418320 | <b>13.8</b>  | -1265.855489 | <b>14.6</b>  | -1265.892874 |
| HF/6-311+G**                                          |                 |              |              |              |              |
| Cyclopentadiene (1)                                   | -192.839556311  |              | -192.741013  |              | -192.767505  |
| Diphenylketene (2)                                    | -610.959930871  |              | -610.751687  |              | -610.791459  |
| Diphenyl 4+2 product (3)                              | -803.799060173  | <b>0.3</b>   | -803.484376  | <b>5.2</b>   | -803.527731  |
| Diphenyl 2+2 product (4)                              | -803.818294978  | <b>-11.8</b> | -803.504847  | <b>-7.6</b>  | -803.548616  |
| Dichloroketene (5)                                    | -1069.584793450 |              | -1069.567725 |              | -1069.597253 |
| Dichloro 2+2 product (7)                              | -1262.477594600 | <b>-33.4</b> | -1262.355568 | <b>-29.4</b> | -1262.389808 |
| Dichloro 4+2 product (8)                              | -1262.446262840 |              | -1262.322722 |              | -1262.356524 |
| Diphenyl 1st TS (Similar to 9, but later)             | -803.738877702  | <b>38.0</b>  | -803.428849  | <b>40.1</b>  | -803.472439  |
| Diphenyl 2nd TS Claisen Rearrangement (Similar to 11) | -803.738361541  | <b>38.4</b>  | -803.427818  | <b>40.7</b>  | -803.470251  |
| Dichloro 1st TS (similar to 18)                       | -1262.385935040 | <b>24.1</b>  | -1262.268297 | <b>25.4</b>  | -1262.303342 |
| Dichloro intermediate (similar to 19)                 | -1262.388481330 | <b>22.5</b>  | -1262.269432 | <b>24.7</b>  | -1262.305029 |
| Dichloro 2nd TS 4+2 side (similar to 20)              | -1262.388337670 | <b>22.6</b>  | -1262.269213 | <b>24.8</b>  | -1262.303532 |
| Dichloro 2nd TS 2+2 side (similar to 21)              | -1262.388306710 | <b>22.6</b>  | -1262.269151 | <b>24.8</b>  | -1262.302991 |
| Dichloro Alternative TS for 2+2 (similar to 10)       | -1262.364819370 | <b>37.4</b>  | -1262.247999 | <b>38.1</b>  | -1262.284189 |

## Estimates of Relative Free Energies

|                                 | G (298)      | Erel         | H (298)    | S (298) | G(est 253)<br>Estimate<br>- good<br>rel only | Erel         |
|---------------------------------|--------------|--------------|------------|---------|----------------------------------------------|--------------|
| mPW1K/6-31G*                    |              |              |            |         |                                              |              |
| Cyclopentadiene (1)             | -193.980996  |              | -193.94945 | 66.389  | -193.97624                                   |              |
| diphenylketene (2)              | -614.363761  |              | -614.31155 | 109.893 | -614.35588                                   |              |
| 4+2_prod (3)                    | -808.346343  | <b>-1.0</b>  | -808.28708 | 124.722 | -808.3374                                    | <b>-3.3</b>  |
| 2+2_prod (4)                    | -808.361051  | <b>-10.2</b> | -808.30076 | 126.886 | -808.35195                                   | <b>-12.4</b> |
| Dichloroketene (5)              | -1071.730027 |              | -1071.6945 | 74.803  | -1071.7247                                   |              |
| Dichloro 2+2 product (7)        | -1265.758978 | <b>-30.1</b> | -1265.715  | 92.457  | -1265.7523                                   | <b>-32.3</b> |
| Dichloro 4+2 product (8)        | -1265.734438 | <b>-14.7</b> | -1265.6915 | 90.359  | -1265.728                                    | <b>-17.0</b> |
| TS 2+2 (10)                     | -808.282664  | <b>39.0</b>  | -808.22136 | 129.016 | -808.27341                                   | <b>36.8</b>  |
| 1st_TS (9)                      | -808.301799  | <b>27.0</b>  | -808.24052 | 128.974 | -808.29255                                   | <b>24.8</b>  |
| 2nd TS rearrangement (11)       | -808.302256  | <b>26.7</b>  | -808.24338 | 123.926 | -808.29337                                   | <b>24.3</b>  |
| Dichloro 1st TS (16)            | -1265.684413 | <b>16.7</b>  | -1265.6387 | 96.177  | -1265.6775                                   | <b>14.7</b>  |
| 2nd TS rearrangement (17)       | -1265.690186 | <b>13.1</b>  | -1265.6469 | 91.146  | -1265.6836                                   | <b>10.8</b>  |
| Dichloro 2+2 TS (Similar to 10) | -1265.664257 | <b>29.3</b>  | -1265.6176 | 98.215  | -1265.6572                                   | <b>27.4</b>  |
| mPW1K/6-31+G**                  |              |              |            |         |                                              |              |
| Cyclopentadiene (1)             | -193.996940  |              | -193.96537 | 66.444  | -193.99218                                   |              |
| diphenylketene (2)              | -614.395272  |              | -614.34287 | 110.292 | -614.38736                                   |              |

|                                    |              |              |            |         |            |              |
|------------------------------------|--------------|--------------|------------|---------|------------|--------------|
| 4+2_product (3)                    | -808.390383  | <b>1.1</b>   | -808.33078 | 125.443 | -808.38139 | <b>-1.2</b>  |
| 2+2_product (4)                    | -808.405385  | <b>-8.3</b>  | -808.34466 | 127.799 | -808.39622 | <b>-10.5</b> |
| Dichloroketene (5)                 | -1071.735130 |              | -1071.6996 | 74.842  | -1071.7298 |              |
| Dichloro 2+2 product (7)           | -1265.777245 | <b>-28.3</b> | -1265.7333 | 92.592  | -1265.7706 | <b>-30.5</b> |
| Dichloro 4+2 product (8)           | -1265.751940 | <b>-12.5</b> | -1265.709  | 90.44   | -1265.7455 | <b>-14.8</b> |
| TS_2+2 (10)                        | -808.328798  | <b>39.8</b>  | -808.26734 | 129.347 | -808.31952 | <b>37.7</b>  |
| 1st_TS (9)                         | -808.347433  | <b>28.1</b>  | -808.28611 | 129.072 | -808.33818 | <b>26.0</b>  |
| 2ndTS_rearrangement (11)           | -808.347346  | <b>28.2</b>  | -808.28876 | 123.304 | -808.3385  | <b>25.7</b>  |
| Dichloro 1st TS (16)               | -1265.703649 | <b>17.8</b>  | -1265.6578 | 96.509  | -1265.6967 | <b>15.8</b>  |
| Dichloro 2nd TS rearrangement (17) | -1265.709641 | <b>14.1</b>  | -1265.6662 | 91.342  | -1265.7031 | <b>11.8</b>  |
| Dichloro 2+2 TS (similar to 10)    | -1265.684532 | <b>29.8</b>  | -1265.6376 | 98.807  | -1265.6774 | <b>27.9</b>  |

## B3LYP/6-31G\*

|                                           |              |              |            |         |            |              |
|-------------------------------------------|--------------|--------------|------------|---------|------------|--------------|
| Cyclopentadiene (1)                       | -194.034761  |              | -194.00308 | 66.686  | -194.02998 |              |
| Diphenylketene (2)                        | -614.551798  |              | -614.49906 | 110.988 | -614.54384 |              |
| 4+2 Product (3)                           | -808.567031  | <b>12.3</b>  | -808.50699 | 126.37  | -808.55797 | <b>9.9</b>   |
| 2+2 Product (4)                           | -808.580059  | <b>4.1</b>   | -808.51915 | 128.19  | -808.57087 | <b>1.9</b>   |
| Dichloroketene (5)                        | -1071.774829 |              | -1071.7389 | 75.524  | -1071.7694 |              |
| Dichloro 2+2 product (7)                  | -1265.836230 | <b>-16.7</b> | -1265.7917 | 93.749  | -1265.8295 | <b>-18.9</b> |
| Dichloro 4+2 Product (8)                  | -1265.811431 | <b>-1.2</b>  | -1265.768  | 91.513  | -1265.8049 | <b>-3.4</b>  |
| 1st_TS (12)                               | -808.540667  | <b>28.8</b>  | -808.47864 | 130.543 | -808.53131 | <b>26.7</b>  |
| Intermediate (13)                         | -808.541268  | <b>28.4</b>  | -808.47903 | 130.989 | -808.53187 | <b>26.3</b>  |
| 2ndTS giving 4+2 (14)                     | -808.540077  | <b>29.2</b>  | -808.47957 | 127.342 | -808.53094 | <b>26.9</b>  |
| 2ndTS giving 2+2 (15)                     | -808.537909  | <b>30.5</b>  | -808.47875 | 124.506 | -808.52898 | <b>28.1</b>  |
| Another TS that gives 2+2 (Similar to 10) | -808.524309  | <b>39.1</b>  | -808.46211 | 130.915 | -808.51492 | <b>37.0</b>  |
| Dichloro 1st TS (18)                      | -1265.780450 | <b>18.3</b>  | -1265.7342 | 97.257  | -1265.7735 | <b>16.3</b>  |
| Dichloro intermediate (19)                | -1265.785253 | <b>15.3</b>  | -1265.7392 | 96.892  | -1265.7783 | <b>13.2</b>  |
| 2nd TS Dichloro 2+2 side (20)             | -1265.783310 | <b>16.5</b>  | -1265.7399 | 91.355  | -1265.7768 | <b>14.2</b>  |
| 2nd TS Dichloro 4+2 side (21)             | -1265.783246 | <b>16.5</b>  | -1265.7394 | 92.378  | -1265.7766 | <b>14.3</b>  |
| Dichloro 2+2 TS (Similar to 10)           | -1265.762263 | <b>29.7</b>  | -1265.7152 | 98.975  | -1265.7552 | <b>27.8</b>  |

## B3LYP/6-311+G\*\*

|                          |              |              |            |         |            |              |
|--------------------------|--------------|--------------|------------|---------|------------|--------------|
| cyclopentadiene (1)      | -194.090725  |              | -194.05902 | 66.721  | -194.08594 |              |
| diphenylketene (2)       | -614.714171  |              | -614.66121 | 111.459 | -614.70618 |              |
| 4+2_product (3)          | -808.773750  | <b>19.5</b>  | -808.71329 | 127.25  | -808.76462 | <b>17.3</b>  |
| 2+2_product (4)          | -808.788779  | <b>10.1</b>  | -808.72742 | 129.146 | -808.77952 | <b>7.9</b>   |
| Dichloroketene (5)       | -1071.880238 |              | -1071.8444 | 75.45   | -1071.8748 |              |
| Dichloro 2+2 product (7) | -1265.989436 | <b>-11.6</b> | -1265.9448 | 93.891  | -1265.9827 | <b>-13.8</b> |
| Dichloro 4+2 product (8) | -1265.961298 | <b>6.1</b>   | -1265.9178 | 91.64   | -1265.9547 | <b>3.8</b>   |
| 1st_TS (12)              | -808.752238  | <b>33.0</b>  | -808.69039 | 130.171 | -808.7429  | <b>30.9</b>  |
| intermediate (13)        | -808.752209  | <b>33.1</b>  | -808.68957 | 131.828 | -808.74276 | <b>31.0</b>  |
| 2ndTS giving 4+2 (14)    | -808.749828  | <b>34.6</b>  | -808.6893  | 127.402 | -808.74069 | <b>32.3</b>  |
| 2ndTS giving 2+2 (15)    | -808.747885  | <b>35.8</b>  | -808.68842 | 125.16  | -808.73891 | <b>33.4</b>  |



|                                                         |              |              |            |         |            |              |
|---------------------------------------------------------|--------------|--------------|------------|---------|------------|--------------|
| Another diphenyl TS giving 2+2 directly (Similar to 10) | -808.736305  | <b>43.0</b>  | -808.67383 | 131.481 | -808.72688 | <b>40.9</b>  |
| Dichloro 1st TS (18)                                    | -1265.936744 | <b>21.5</b>  | -1265.8906 | 97.104  | -1265.9298 | <b>19.4</b>  |
| Dichloro intermediate (19)                              | -1265.939927 | <b>19.5</b>  | -1265.8938 | 96.985  | -1265.933  | <b>17.4</b>  |
| 2ndTS Dichloro 2+2 side (21)                            | -1265.937815 | <b>20.8</b>  | -1265.8943 | 91.532  | -1265.9313 | <b>18.5</b>  |
| 2ndTS dichloro 4+2 side (20)                            | -1265.936736 | <b>21.5</b>  | -1265.8928 | 92.461  | -1265.9301 | <b>19.2</b>  |
| Dichloro alternative 2+2 TS (similar to 10)             | -1265.918977 | <b>32.6</b>  | -1265.8719 | 99.096  | -1265.9119 | <b>30.7</b>  |
| <b>BPW91/6-311+G**</b>                                  |              |              |            |         |            |              |
| Cyclopentadiene (1)                                     | -194.061585  |              | -194.02971 | 67.079  | -194.05677 |              |
| Diphenylketene (2)                                      | -614.641339  |              | -614.58757 | 113.162 | -614.63322 |              |
| Diphenyl 4+2 product (3)                                | -808.674421  | <b>17.9</b>  | -808.61284 | 129.607 | -808.66513 | <b>15.6</b>  |
| Diphenyl 2+2 product (4)                                | -808.687877  | <b>9.4</b>   | -808.62551 | 131.27  | -808.67846 | <b>7.2</b>   |
| Dichloroketene (5)                                      | -1071.873817 |              | -1071.8378 | 75.882  | -1071.8684 |              |
| Dichloro 2+2 product (7)                                | -1265.956006 | <b>-12.9</b> | -1265.9109 | 94.954  | -1265.9492 | <b>-15.1</b> |
| Dichloro 4+2 product (8)                                | -1265.928390 | <b>4.4</b>   | -1265.8844 | 92.597  | -1265.9217 | <b>2.1</b>   |
| Diphenyl1stTS (Similar to 12)                           | -808.658579  | <b>27.8</b>  | -808.59539 | 133     | -808.64904 | <b>25.7</b>  |
| Diphenyl Intermediate (Similar to 13)                   | -808.660052  | <b>26.9</b>  | -808.59667 | 133.391 | -808.65049 | <b>24.8</b>  |
| Diphenyl 2nd TS 4+2 side (Similar to 14)                | -808.657779  | <b>28.3</b>  | -808.59645 | 129.087 | -808.64852 | <b>26.0</b>  |
| Diphenyl 2nd TS 2+2 side (Similar to 15)                | -808.655205  | <b>29.9</b>  | -808.59477 | 127.205 | -808.64608 | <b>27.6</b>  |
| Diphenyl 1st TS 2+2 (Similar to 10)                     | -808.644631  | <b>36.6</b>  | -808.58141 | 133.051 | -808.63509 | <b>34.5</b>  |
| Dichloro 1st TS (similar to 18)                         | -1265.907499 | <b>17.5</b>  | -1265.8601 | 99.817  | -1265.9003 | <b>15.6</b>  |
| Dichloro Intermediate (similar to 19)                   | -1265.915229 | <b>12.7</b>  | -1265.8688 | 97.676  | -1265.9082 | <b>10.6</b>  |
| Dichloro 2nd TS 4+2 side (similar to 20)                | -1265.911356 | <b>15.1</b>  | -1265.8672 | 92.899  | -1265.9047 | <b>12.8</b>  |
| Dichloro 2nd TS 2+2 side (similar to 21)                | -1265.912913 | <b>14.1</b>  | -1265.8691 | 92.3    | -1265.9063 | <b>11.8</b>  |
| Dichloro Alternative TS for 2+2 (similar to 10)         | -1265.892874 | <b>26.7</b>  | -1265.8446 | 101.61  | -1265.8856 | <b>24.8</b>  |
| <b>HF/6-311+G**</b>                                     |              |              |            |         |            |              |
| Cyclopentadiene (1)                                     | -192.767505  |              | -192.73616 | 65.981  | -192.76277 |              |
| Diphenylketene (2)                                      | -610.791459  |              | -610.73953 | 109.294 | -610.78362 |              |
| Diphenyl 4+2 product (3)                                | -803.527731  | <b>19.6</b>  | -803.46925 | 123.084 | -803.5189  | <b>17.3</b>  |
| Diphenyl 2+2 product (4)                                | -803.548616  | <b>6.5</b>   | -803.48921 | 125.024 | -803.53965 | <b>4.2</b>   |
| Dichloroketene (5)                                      | -1069.597253 |              | -1069.562  | 74.277  | -1069.5919 |              |
| Dichloro 2+2 product (7)                                | -1262.389808 | <b>-15.7</b> | -1262.3464 | 91.315  | -1262.3833 | <b>-17.9</b> |
| Dichloro 4+2 product (8)                                | -1262.356524 |              | -1262.3141 | 89.253  | -1262.3501 |              |
| Diphenyl 1st TS (Similar to 9, but later)               | -803.472439  | <b>54.3</b>  | -803.41328 | 124.508 | -803.46351 | <b>52.0</b>  |
| Diphenyl 2nd TS Claisen Rearrangement (Similar to 11)   | -803.470251  | <b>55.7</b>  | -803.41256 | 121.429 | -803.46154 | <b>53.2</b>  |
| Dichloro 1st TS (similar to 18)                         | -1262.303342 | <b>38.5</b>  | -1262.2586 | 94.254  | -1262.2966 | <b>36.5</b>  |
| Dichloro intermediate (similar to 19)                   | -1262.305029 | <b>37.5</b>  | -1262.2595 | 95.777  | -1262.2982 | <b>35.5</b>  |
| Dichloro 2nd TS 4+2 side (similar to 20)                | -1262.303532 | <b>38.4</b>  | -1262.2601 | 91.32   | -1262.297  | <b>36.2</b>  |
| Dichloro 2nd TS 2+2 side (similar to 21)                | -1262.302991 | <b>38.8</b>  | -1262.2602 | 90.06   | -1262.2965 | <b>36.5</b>  |
| Dichloro Alternative TS for 2+2 (similar to 10)         | -1262.284189 | <b>50.6</b>  | -1262.2379 | 97.335  | -1262.2772 | <b>48.6</b>  |

to 10)

**Cyclopentadiene (1) MPW1K/6-31G(d)**

E(RmPW+HF-PW91) = -194.050307777

|                                              |                             |
|----------------------------------------------|-----------------------------|
| Zero-point correction=                       | 0.095858 (Hartree/Particle) |
| Thermal correction to Energy=                | 0.099912                    |
| Thermal correction to Enthalpy=              | 0.100856                    |
| Thermal correction to Gibbs Free Energy=     | 0.069312                    |
| Sum of electronic and zero-point Energies=   | -193.954450                 |
| Sum of electronic and thermal Energies=      | -193.950396                 |
| Sum of electronic and thermal Enthalpies=    | -193.949452                 |
| Sum of electronic and thermal Free Energies= | -193.980996                 |

|       | E (Thermal)<br>KCal/Mol | CV<br>Cal/Mol-Kelvin | S<br>Cal/Mol-Kelvin |
|-------|-------------------------|----------------------|---------------------|
| Total | 62.695                  | 14.934               | 66.389              |

C,0,0.6003919099,0.8506083964,-0.6040098647  
 C,0,0.6945903468,0.703966072,0.7225490139  
 C,0,-0.1510700956,-0.4095461893,1.144355466  
 C,0,-0.7552548618,-0.9344588365,0.0721781566  
 C,0,-0.3335046789,-0.180688801,-1.1456194429  
 H,0,1.1050778522,1.5850039238,-1.2103051023  
 H,0,1.2944446844,1.303482025,1.3893099801  
 H,0,-0.2597978884,-0.7430230773,2.164544852  
 H,0,-1.4402259207,-1.7664965693,0.0592733616  
 H,0,-1.1857776237,0.2711897433,-1.661346368  
 H,0,0.1553631743,-0.8294398948,-1.8781966969

**diphenylketene (2) MPW1K/6-31G(d)**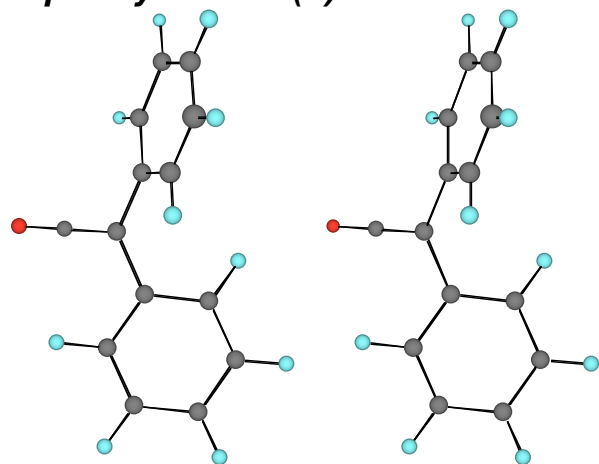

E(RmPW+HF-PW91) = -614.526857967

|                                            |                             |
|--------------------------------------------|-----------------------------|
| Zero-point correction=                     | 0.202727 (Hartree/Particle) |
| Thermal correction to Energy=              | 0.214367                    |
| Thermal correction to Enthalpy=            | 0.215311                    |
| Thermal correction to Gibbs Free Energy=   | 0.163097                    |
| Sum of electronic and zero-point Energies= | -614.324131                 |
| Sum of electronic and thermal Energies=    | -614.312491                 |
| Sum of electronic and thermal Enthalpies=  | -614.311547                 |

Sum of electronic and thermal Free Energies= -614.363761

|       | E (Thermal)<br>KCal/Mol | CV<br>Cal/Mol-Kelvin | S<br>Cal/Mol-Kelvin |
|-------|-------------------------|----------------------|---------------------|
| Total | 134.517                 | 44.932               | 109.893             |

C,0,2.0107521743,0.7815923246,0.037770946  
O,0,3.0896866902,1.2008811997,0.0582779763  
C,0,0.7804205673,0.3032270398,0.0146704403  
C,0,0.1280772595,0.0001187465,1.3054986261  
C,0,-1.2368598143,0.2326979191,1.4687354239  
C,0,0.8537301403,-0.500166186,2.3847648563  
C,0,-1.8541368489,-0.0292418595,2.6786614405  
H,0,-1.8107105657,0.624367178,0.642070449  
C,0,0.2366893142,-0.7413573535,3.6001348437  
H,0,1.9073467942,-0.7130423237,2.2674619849  
C,0,-1.1207681068,-0.5118241328,3.7517926314  
H,0,-2.9132521769,0.1548917242,2.7861058173  
H,0,0.8178664902,-1.1257046361,4.4256154355  
H,0,-1.604646416,-0.711048632,4.696449319  
C,0,0.1370708948,0.1028662641,-1.3004593401  
C,0,-0.705866078,-0.9885477079,-1.5056470786  
C,0,0.3687503575,0.9760638986,-2.3613767038  
C,0,-1.2979756488,-1.1966374513,-2.7383727681  
H,0,-0.8909940642,-1.6757564896,-0.6935069889  
C,0,-0.2090253473,0.7529224897,-3.5993014818  
H,0,0.9970274482,1.8433044997,-2.2119511252  
C,0,-1.0487652487,-0.3314041501,-3.7927134445  
H,0,-1.9501647464,-2.0464909249,-2.8782572165  
H,0,-0.0136935784,1.439672038,-4.4099441519  
H,0,-1.5088343975,-0.4991010787,-4.7552176805

#### 4+2\_prod (3) MPW1K/6-31G(d)

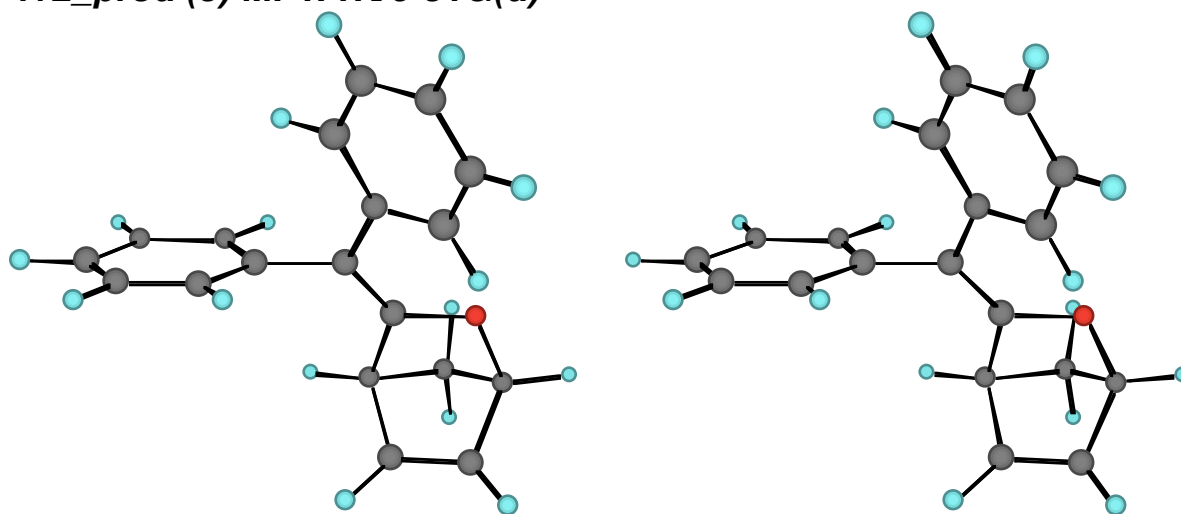

E(RmPW+HF-PW91) = -808.608985300

|                                            |                             |
|--------------------------------------------|-----------------------------|
| Zero-point correction=                     | 0.306236 (Hartree/Particle) |
| Thermal correction to Energy=              | 0.320958                    |
| Thermal correction to Enthalpy=            | 0.321902                    |
| Thermal correction to Gibbs Free Energy=   | 0.262643                    |
| Sum of electronic and zero-point Energies= | -808.302749                 |

Sum of electronic and thermal Energies= -808.288027  
 Sum of electronic and thermal Enthalpies= -808.287083  
 Sum of electronic and thermal Free Energies= -808.346343

|       | E (Thermal)<br>KCal/Mol | CV<br>Cal/Mol-Kelvin | S<br>Cal/Mol-Kelvin |
|-------|-------------------------|----------------------|---------------------|
| Total | 201.404                 | 59.909               | 124.722             |

C,0,2.2288397183,1.0187230274,0.2832240847  
 C,0,2.9362352331,1.0275069341,-1.059623082  
 C,0,3.6437897086,-0.0954701575,-1.1427932222  
 C,0,3.3676114068,-0.8412359587,0.1403086289  
 C,0,3.2851152537,0.3004298292,1.1403421773  
 O,0,1.9796435741,-1.2609124888,0.0912031351  
 C,0,1.2384533018,-0.124504664,0.1579408183  
 C,0,-0.0996336006,-0.0977333508,0.0839200604  
 H,0,1.8225925446,1.9580568878,0.6311177091  
 H,0,2.7773059948,1.7716944304,-1.82334764  
 H,0,4.1957585091,-0.4768216467,-1.9861247909  
 H,0,3.9632718295,-1.7141588618,0.3732445662  
 H,0,4.2069103111,0.8658148801,1.2354909369  
 H,0,2.9203196965,-0.0189707388,2.1149230713  
 C,0,-0.7996382418,1.2031511232,0.2393547552  
 C,0,-0.707088717,1.9445689328,1.4144334322  
 C,0,-1.5922373636,1.701075944,-0.7939830564  
 C,0,-1.3607994581,3.1603791498,1.5448328902  
 H,0,-0.12541984,1.5524078106,2.236901588  
 C,0,-2.2483556335,2.9124991939,-0.6654860461  
 H,0,-1.6881055607,1.1268201378,-1.70423761  
 C,0,-2.1316208861,3.6496158989,0.5037888887  
 H,0,-1.2753200096,3.7193737945,2.4656373942  
 H,0,-2.8515953175,3.2843803903,-1.4811769963  
 H,0,-2.6448399173,4.5948678478,0.6042121432  
 C,0,-0.9326051922,-1.2977033706,-0.1375896971  
 C,0,-2.2296045652,-1.3416702228,0.3779865539  
 C,0,-0.4842187796,-2.3986915105,-0.8706907463  
 C,0,-3.0422326883,-2.444247774,0.1815940258  
 H,0,-2.602159196,-0.4999585736,0.9427558772  
 C,0,-1.2999814368,-3.4980154468,-1.070228384  
 H,0,0.5103588024,-2.3892409005,-1.284460206  
 C,0,-2.5821086109,-3.5300510275,-0.544848299  
 H,0,-4.039231857,-2.452847395,0.59835968  
 H,0,-0.9307936968,-4.3350453331,-1.6456747787  
 H,0,-3.2157175764,-4.3908321197,-0.7021487184

**2+2\_prod (4) MPW1K/6-31G(d)**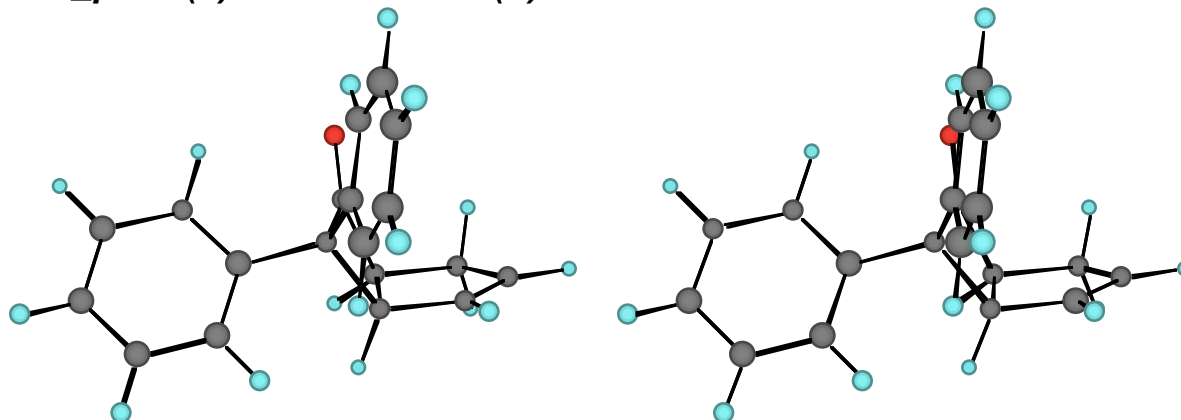

E(RmPW+HF-PW91) = -808.621789989

|                                              |                             |
|----------------------------------------------|-----------------------------|
| Zero-point correction=                       | 0.304807 (Hartree/Particle) |
| Thermal correction to Energy=                | 0.320083                    |
| Thermal correction to Enthalpy=              | 0.321027                    |
| Thermal correction to Gibbs Free Energy=     | 0.260739                    |
| Sum of electronic and zero-point Energies=   | -808.316983                 |
| Sum of electronic and thermal Energies=      | -808.301707                 |
| Sum of electronic and thermal Enthalpies=    | -808.300763                 |
| Sum of electronic and thermal Free Energies= | -808.361051                 |

|       | E (Thermal) | CV             | S              |
|-------|-------------|----------------|----------------|
|       | KCal/Mol    | Cal/Mol-Kelvin | Cal/Mol-Kelvin |
| Total | 200.855     | 61.059         | 126.886        |

C,0,-2.1705417418,-1.2823123963,-0.3306824953  
 C,0,-1.5216904116,-0.0485201909,-1.0041629448  
 C,0,-2.4817676284,1.0408209252,-0.6348410057  
 C,0,-3.5797048923,0.5783788149,-0.048413733  
 C,0,-3.5877831195,-0.9156170602,0.0979196247  
 C,0,-1.1144571302,-1.1436855528,0.7483908592  
 O,0,-1.0342275945,-1.569846176,1.8615688778  
 C,0,-0.2597656181,-0.1773784962,-0.0825460243  
 H,0,-2.0786015075,-2.2230296927,-0.8693588907  
 H,0,-1.3269476788,-0.0998416814,-2.0724769411  
 H,0,-2.2848902581,2.0830847623,-0.8340259565  
 H,0,-4.4005308888,1.1958310216,0.2862735736  
 H,0,-4.3457185409,-1.3766404061,-0.5384607073  
 H,0,-3.7897448053,-1.2400583597,1.1193730071  
 C,0,0.2579372399,1.0768511032,0.5801849945  
 C,0,0.5970062036,2.1753138054,-0.2046388251  
 C,0,0.4260617384,1.1592252409,1.9562136907  
 C,0,1.0846862713,3.3340092317,0.3721779904  
 H,0,0.4817068466,2.1211474184,-1.2785654802  
 C,0,0.9170058776,2.32083965,2.5337972921  
 H,0,0.1675391874,0.3144305683,2.5753495339  
 C,0,1.246372444,3.4108153085,1.7473823638  
 H,0,1.3406817913,4.177683395,-0.2524172492  
 H,0,1.0397955726,2.3704498845,3.6060983685  
 H,0,1.6278127543,4.3143779543,2.2000571199  
 C,0,0.8847779024,-0.9513971267,-0.7224073557  
 C,0,1.2434699258,-0.7608411701,-2.0519774608

C,0,1.6357859952,-1.832940164,0.0494536431  
 C,0,2.3224150892,-1.4369791284,-2.598190688  
 H,0,0.6868822029,-0.0744467384,-2.6730171032  
 C,0,2.7115641587,-2.5119203301,-0.4970641091  
 H,0,1.3724149207,-1.9884939217,1.0854126908  
 C,0,3.05883416,-2.3178148396,-1.8239829687  
 H,0,2.5859577106,-1.2737642725,-3.6331551733  
 H,0,3.2787687254,-3.1953536029,0.1178916731  
 H,0,3.8974559387,-2.8476926673,-2.2512065741

### Dichloroketene (5) MPW1K/6-31G\*

E(RmPW+HF-PW91) = -1071.71671378

|                                              |                             |
|----------------------------------------------|-----------------------------|
| Zero-point correction=                       | 0.016336 (Hartree/Particle) |
| Thermal correction to Energy=                | 0.021284                    |
| Thermal correction to Enthalpy=              | 0.022228                    |
| Thermal correction to Gibbs Free Energy=     | -0.013313                   |
| Sum of electronic and zero-point Energies=   | -1071.700377                |
| Sum of electronic and thermal Energies=      | -1071.695430                |
| Sum of electronic and thermal Enthalpies=    | -1071.694486                |
| Sum of electronic and thermal Free Energies= | -1071.730027                |

|       | E (Thermal)<br>KCal/Mol | CV<br>Cal/Mol-Kelvin | S<br>Cal/Mol-Kelvin |
|-------|-------------------------|----------------------|---------------------|
| Total | 13.356                  | 15.044               | 74.803              |

C,0,1.2103973572,-0.5266769548,-0.2364618545  
 C,0,0.0250118264,-0.0108774896,-0.0048545513  
 O,0,2.2534285775,-0.9805336126,-0.4402559479  
 Cl,0,-1.2901784142,-1.0320874655,0.3960231269  
 Cl,0,-0.2062853342,1.683240146,-0.1036733611

### Dichloro 2+2 product (7) MPW1K/6-31G\*

E(RmPW+HF-PW91) = -1265.84269867

|                                              |                             |
|----------------------------------------------|-----------------------------|
| Zero-point correction=                       | 0.118219 (Hartree/Particle) |
| Thermal correction to Energy=                | 0.126706                    |
| Thermal correction to Enthalpy=              | 0.127650                    |
| Thermal correction to Gibbs Free Energy=     | 0.083721                    |
| Sum of electronic and zero-point Energies=   | -1265.724480                |
| Sum of electronic and thermal Energies=      | -1265.715993                |
| Sum of electronic and thermal Enthalpies=    | -1265.715049                |
| Sum of electronic and thermal Free Energies= | -1265.758978                |

|       | E (Thermal)<br>KCal/Mol | CV<br>Cal/Mol-Kelvin | S<br>Cal/Mol-Kelvin |
|-------|-------------------------|----------------------|---------------------|
| Total | 79.509                  | 31.269               | 92.457              |

C,0,-0.6374669443,-0.9054632903,-1.128275205  
 C,0,-0.3971676904,0.6124884894,-0.9017327931  
 C,0,-1.7215223299,1.0626405266,-0.3682971457  
 C,0,-2.6477266996,0.1147737721,-0.4473151078  
 C,0,-2.1391597624,-1.1651161679,-1.0411975387  
 C,0,0.1176346029,-1.1540650217,0.1708028319  
 O,0,0.1736974067,-2.0441664636,0.9496893732  
 C,0,0.6639877798,0.2879670167,0.1758651209

Cl,0,2.2989748865,0.2758324535,-0.5212255301  
 Cl,0,0.6318041045,1.1627329489,1.6924862171  
 H,0,-0.1393152829,-1.3470171214,-1.9873897332  
 H,0,-0.0165187554,1.2183966426,-1.7197358447  
 H,0,-1.8786593002,2.0577277587,0.0171948913  
 H,0,-3.6743566067,0.2376478843,-0.135514251  
 H,0,-2.5794989741,-1.353401022,-2.0217156679  
 H,0,-2.3559469199,-2.0349862233,-0.4208870332

### **Dichloro 4+2 product (8) MPW1K/6-31G\***

E(RmPW+HF-PW91) = -1265.82022146

|                                              |                             |
|----------------------------------------------|-----------------------------|
| Zero-point correction=                       | 0.119835 (Hartree/Particle) |
| Thermal correction to Energy=                | 0.127772                    |
| Thermal correction to Enthalpy=              | 0.128716                    |
| Thermal correction to Gibbs Free Energy=     | 0.085784                    |
| Sum of electronic and zero-point Energies=   | -1265.700386                |
| Sum of electronic and thermal Energies=      | -1265.692449                |
| Sum of electronic and thermal Enthalpies=    | -1265.691505                |
| Sum of electronic and thermal Free Energies= | -1265.734438                |

|       | E (Thermal) | CV             | S              |
|-------|-------------|----------------|----------------|
|       | KCal/Mol    | Cal/Mol-Kelvin | Cal/Mol-Kelvin |
| Total | 80.178      | 30.071         | 90.359         |

C,0,1.3339329209,0.6062914272,0.503670154  
 C,0,2.049133422,0.8440218928,-0.8132564344  
 C,0,2.4245175375,-0.3444317823,-1.2779369093  
 C,0,1.9337319159,-1.3524227111,-0.2682346257  
 C,0,2.1350918773,-0.597178119,1.0352836149  
 O,0,0.4789020973,-1.3614736333,-0.3528164879  
 C,0,0.0898816135,-0.1528290588,0.0986240633  
 C,0,-1.1819030257,0.2261634024,0.1394081397  
 Cl,0,-1.650618445,1.7731322802,0.7315582531  
 Cl,0,-2.4559114395,-0.7936280655,-0.3832988284  
 H,0,1.1736126805,1.4575898983,1.1515721298  
 H,0,2.1172723825,1.8016775635,-1.3032082468  
 H,0,2.8712213537,-0.57653259,-2.2304366889  
 H,0,2.2662084684,-2.378276583,-0.3510557094  
 H,0,3.1712078937,-0.3491627425,1.2426540449  
 H,0,1.6739509118,-1.092768437,1.8872481407

**TS 2+2 (10) MPW1K/6-31G(d)**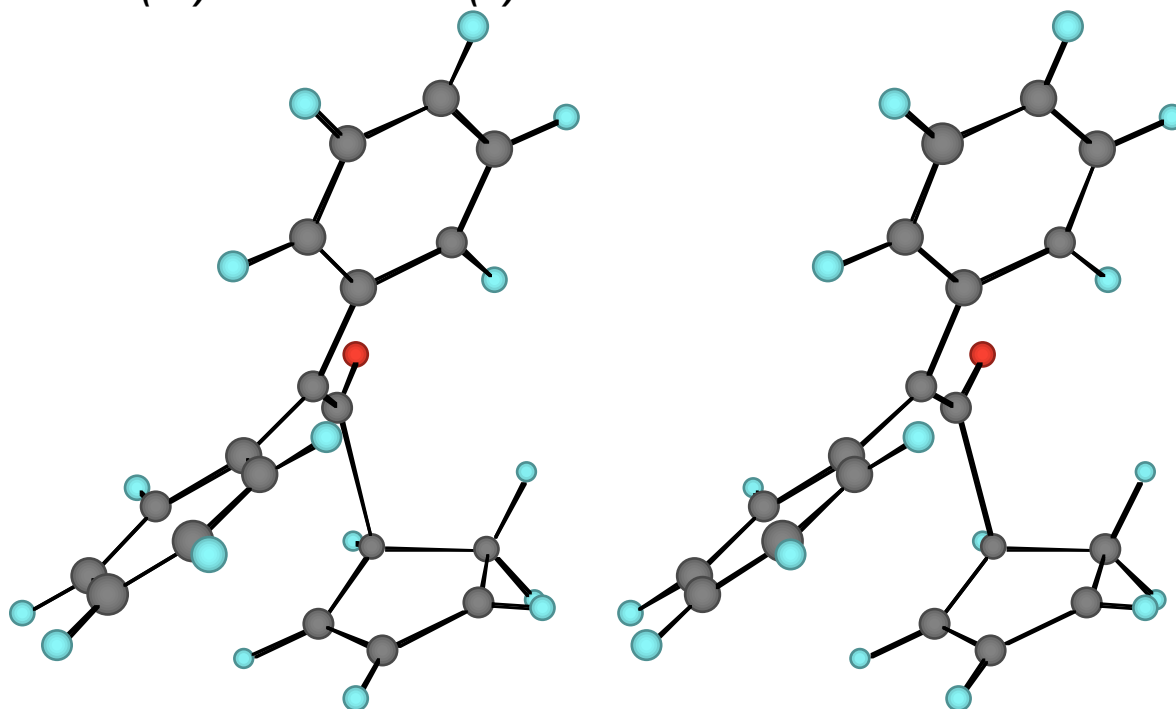

E(RmPW+HF-PW91) = -808.538528206

|                                              |                             |
|----------------------------------------------|-----------------------------|
| Zero-point correction=                       | 0.300461 (Hartree/Particle) |
| Thermal correction to Energy=                | 0.316220                    |
| Thermal correction to Enthalpy=              | 0.317165                    |
| Thermal correction to Gibbs Free Energy=     | 0.255865                    |
| Sum of electronic and zero-point Energies=   | -808.238067                 |
| Sum of electronic and thermal Energies=      | -808.222308                 |
| Sum of electronic and thermal Enthalpies=    | -808.221364                 |
| Sum of electronic and thermal Free Energies= | -808.282664                 |

|       | E (Thermal) | CV             | S              |
|-------|-------------|----------------|----------------|
|       | KCal/Mol    | Cal/Mol-Kelvin | Cal/Mol-Kelvin |
| Total | 198.431     | 62.349         | 129.016        |

```

C,0,-2.260224705,-1.1700756517,-0.9462675379
C,0,-2.6835527434,0.1667214536,-0.9770753715
C,0,-2.8386504123,0.6537945857,0.3494856963
C,0,-2.6860006714,-0.3797160803,1.2090608777
C,0,-2.5354322367,-1.6559662104,0.4646955828
C,0,-0.415087283,-1.3773910891,-0.9921042036
O,0,-0.2227189349,-2.4763020215,-1.4174258183
C,0,0.3235901829,-0.3750897848,-0.3786702671
H,0,-2.4900712592,-1.8112114298,-1.78406004
H,0,-2.9015748805,0.7311351071,-1.8669864057
H,0,-3.0167927116,1.6833729795,0.6116227487
H,0,-2.7171059019,-0.313014097,2.2851435485
H,0,-3.4913368577,-2.1930602913,0.4725477656
H,0,-1.7936362233,-2.3341963984,0.8786468869
C,0,0.0417116975,1.0303495986,-0.5777394669
C,0,-0.4285192925,1.5011604751,-1.8088398396
C,0,0.2202717962,1.977648384,0.4470437708
C,0,-0.7292437044,2.846361523,-2.0058861997

```



```

H,0,-0.4913848855,0.8152908445,-2.6410777645
C,0,-0.0722663942,3.3069534682,0.2493311866
H,0,0.5721462632,1.6421692626,1.4111399729
C,0,-0.5571079115,3.7523343396,-0.9813223486
H,0,-1.0793518171,3.1781709991,-2.9730657835
H,0,0.065020594,4.0099999901,1.0585515908
H,0,-0.7812341157,4.7982307019,-1.1314417042
C,0,1.4639024417,-0.8280134488,0.4363301176
C,0,2.5845493752,-0.0075148974,0.6112039941
C,0,1.4934644599,-2.0871133902,1.0445875311
C,0,3.6660115219,-0.4183265018,1.3694642927
H,0,2.6157181208,0.9561578481,0.126083532
C,0,2.5786643408,-2.4981945144,1.7957362385
H,0,0.660939158,-2.7620061779,0.9160546261
C,0,3.6721819779,-1.6653991419,1.9722960995
H,0,4.5166709092,0.2398972167,1.4763068556
H,0,2.5659729023,-3.4785883562,2.2504015796
H,0,4.5181975469,-1.9870707294,2.5615582215

```

### 1st\_TS (9) MPW1K/6-31G(d)

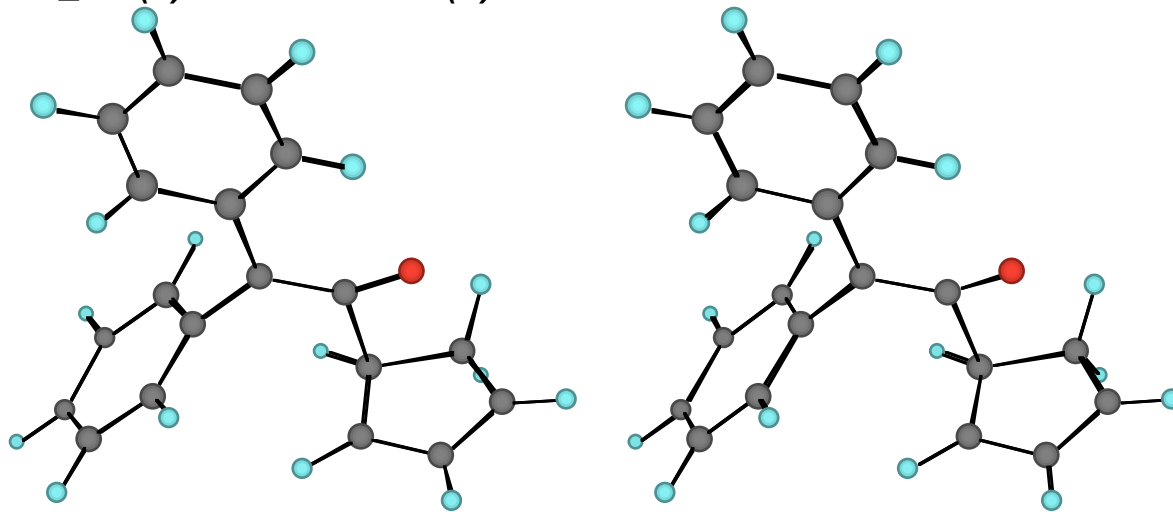

E(RmPW+HF-PW91) = -808.558070111

|                                              |                             |
|----------------------------------------------|-----------------------------|
| Zero-point correction=                       | 0.300890 (Hartree/Particle) |
| Thermal correction to Energy=                | 0.316607                    |
| Thermal correction to Enthalpy=              | 0.317551                    |
| Thermal correction to Gibbs Free Energy=     | 0.256271                    |
| Sum of electronic and zero-point Energies=   | -808.257180                 |
| Sum of electronic and thermal Energies=      | -808.241463                 |
| Sum of electronic and thermal Enthalpies=    | -808.240519                 |
| Sum of electronic and thermal Free Energies= | -808.301799                 |

|       | E (Thermal) | CV             | S              |
|-------|-------------|----------------|----------------|
|       | KCal/Mol    | Cal/Mol-Kelvin | Cal/Mol-Kelvin |
| Total | 198.674     | 62.309         | 128.974        |

```

C,0,-2.4098711525,0.3760507549,-0.5020885538
C,0,-2.5332255987,0.8485496805,0.7968590092
C,0,-3.5138695931,0.0861421576,1.4947558758
C,0,-4.0626119257,-0.7973766055,0.6326087549
C,0,-3.5562155197,-0.5604887905,-0.7432574766

```

```

O,0,-1.581161975,-1.8894359355,0.3882303393
C,0,-1.0471904966,-0.8507016018,0.1153885421
C,0,0.1874028379,-0.2862368728,0.0181634443
H,0,-1.9417082105,0.9401816375,-1.2911669432
H,0,-1.947152807,1.6498230014,1.2148930152
H,0,-3.7219511201,0.1642698026,2.5487101699
H,0,-4.7888340202,-1.5547369092,0.8797428851
H,0,-4.3142358861,-0.0306962292,-1.3303116266
H,0,-3.297937754,-1.4718363214,-1.2736480709
C,0,1.3668827953,-1.164166025,0.1095657038
C,0,1.2726705608,-2.5407027723,0.3546194466
C,0,2.6511084996,-0.625437086,-0.0381670906
C,0,2.4058472706,-3.325858486,0.4538794098
H,0,0.301953759,-2.9946552212,0.4674384827
C,0,3.7807490183,-1.4177716694,0.0615319
H,0,2.767840181,0.4300964822,-0.2284486245
C,0,3.6697686315,-2.7754390241,0.3085121794
H,0,2.2964201924,-4.3841643175,0.644883993
H,0,4.7552135189,-0.9650680308,-0.0560871991
H,0,4.5514635716,-3.394797479,0.3849170826
C,0,0.4163853463,1.1502932732,-0.2789599622
C,0,0.5964857723,2.073349498,0.7488177327
C,0,0.5346593018,1.6002192292,-1.5932612787
C,0,0.8516909996,3.4083745892,0.4749220869
H,0,0.5464856374,1.7284975372,1.7721818357
C,0,0.7850478215,2.9341890034,-1.8722668105
H,0,0.4332901011,0.8870797671,-2.3995173888
C,0,0.9404176724,3.8433849265,-0.8375347627
H,0,0.9864010502,4.1075487309,1.2876770178
H,0,0.8663199181,3.2625904501,-2.8984530668
H,0,1.1389342184,4.8831095081,-1.0531831794

```

## 2<sup>nd</sup> TS rearrangement (11) MPW1K/6-31G(d)

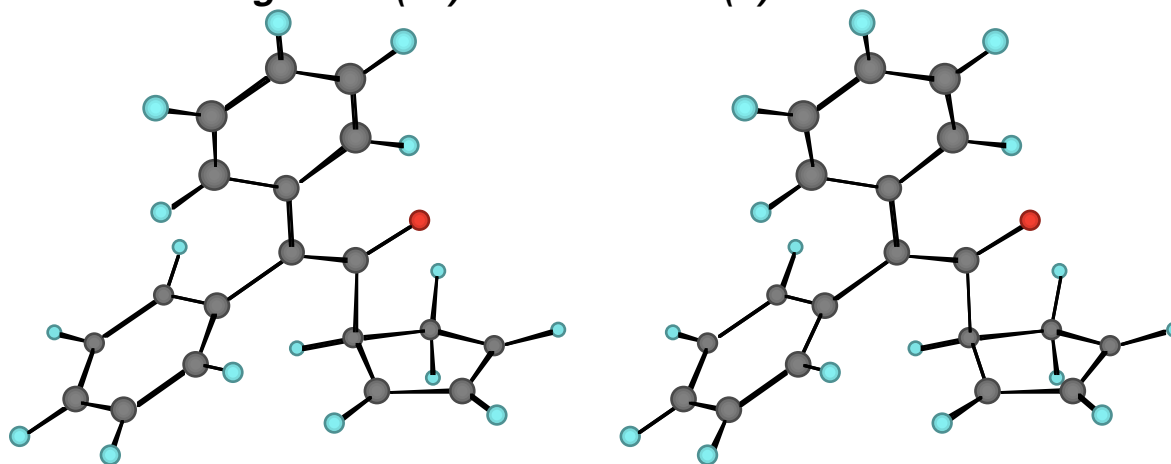

E(RmPW+HF-PW91) = -808.561774659

|                                            |                             |
|--------------------------------------------|-----------------------------|
| Zero-point correction=                     | 0.302633 (Hartree/Particle) |
| Thermal correction to Energy=              | 0.317456                    |
| Thermal correction to Enthalpy=            | 0.318400                    |
| Thermal correction to Gibbs Free Energy=   | 0.259518                    |
| Sum of electronic and zero-point Energies= | -808.259142                 |
| Sum of electronic and thermal Energies=    | -808.244319                 |
| Sum of electronic and thermal Enthalpies=  | -808.243375                 |

Sum of electronic and thermal Free Energies= -808.302256

|       | E (Thermal)<br>KCal/Mol | CV<br>Cal/Mol-Kelvin | S<br>Cal/Mol-Kelvin |
|-------|-------------------------|----------------------|---------------------|
| Total | 199.206                 | 60.450               | 123.926             |

C,0,2.2257200485,0.8934898767,-2.8194617304  
 C,0,1.4256017589,1.1738851115,-1.5638498611  
 C,0,2.3436733691,0.8820460739,-0.4708845726  
 C,0,3.3708667951,0.0612708978,-0.9452230448  
 C,0,3.2133343199,-0.0856179641,-2.2959742696  
 C,0,0.6244606862,-0.1801954414,-1.2721304086  
 C,0,-0.1748647813,-0.1895217215,-0.1253906287  
 O,0,0.9465778236,-1.1138210811,-2.01564378  
 H,0,0.8405154291,2.0802218176,-1.5112900857  
 H,0,2.2016333494,1.211167193,0.5439100113  
 H,0,4.0854857314,-0.4614198287,-0.3317269599  
 H,0,3.7888733243,-0.748619026,-2.9220442975  
 H,0,2.7415738059,1.8033584909,-3.1407737331  
 H,0,1.6323034597,0.5103074545,-3.6415688893  
 C,0,-0.5098690398,1.0847363742,0.5624781491  
 C,0,-1.2953240677,2.0531964198,-0.0599650565  
 C,0,-0.0867145015,1.3262371798,1.869874075  
 C,0,-1.6187349546,3.2358303116,0.5866747644  
 H,0,-1.6616929407,1.8665078114,-1.0597552172  
 C,0,-0.4132161064,2.5039033895,2.5211075488  
 H,0,0.4991901464,0.5718817364,2.3768089235  
 C,0,-1.176280459,3.4668447566,1.8787480428  
 H,0,-2.2268512179,3.9729261156,0.0822716681  
 H,0,-0.0707593319,2.6698533247,3.5323914265  
 H,0,-1.4306196884,4.3864188018,2.3851121432  
 C,0,-0.8951237771,-1.3891155491,0.3056301289  
 C,0,-1.873039656,-1.3091695592,1.3082275392  
 C,0,-0.6219790866,-2.6598755553,-0.2269675536  
 C,0,-2.5247660219,-2.4365100076,1.7720479842  
 H,0,-2.1283486611,-0.3495446406,1.7292873138  
 C,0,-1.2708060804,-3.7828707444,0.2479221446  
 H,0,0.0979050303,-2.7420951169,-1.022951708  
 C,0,-2.2256588544,-3.6837218003,1.249025217  
 H,0,-3.2743521178,-2.3366295967,2.5440394411  
 H,0,-1.0345081749,-4.7476036122,-0.178237373  
 H,0,-2.7366482787,-4.5652145674,1.6083467672

### Dichloro 1<sup>st</sup> TS (16) MPW1K/6-31G\*

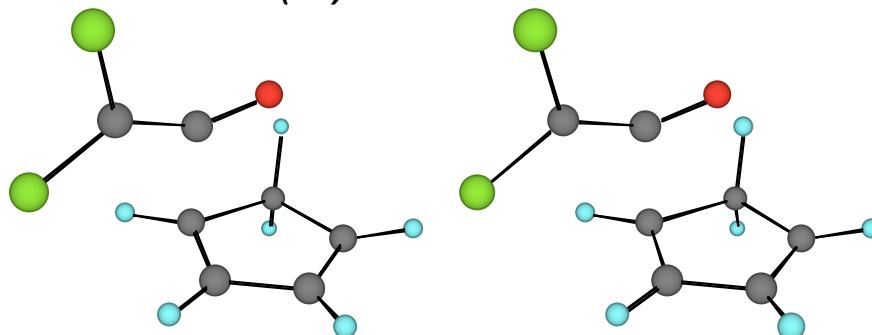

key distances OC 2.848 CC 2.154 CC 3.049  
 E(RmPW+HF-PW91) = -1265.76296903

Zero-point correction= 0.114090 (Hartree/Particle)  
 Thermal correction to Energy= 0.123309  
 Thermal correction to Enthalpy= 0.124253  
 Thermal correction to Gibbs Free Energy= 0.078556  
 Sum of electronic and zero-point Energies= -1265.648879  
 Sum of electronic and thermal Energies= -1265.639660  
 Sum of electronic and thermal Enthalpies= -1265.638716  
 Sum of electronic and thermal Free Energies= -1265.684413

|       | E (Thermal)<br>KCal/Mol | CV<br>Cal/Mol-Kelvin | S<br>Cal/Mol-Kelvin |
|-------|-------------------------|----------------------|---------------------|
| Total | 77.378                  | 33.066               | 96.177              |

C,0,1.3198145442,0.7568189474,0.7040058887  
 C,0,1.4887326073,1.0021714142,-0.6338195347  
 C,0,2.5412787944,0.1683308114,-1.1472623147  
 C,0,3.0471348055,-0.5590320453,-0.1349057054  
 C,0,2.3986462645,-0.1746784228,1.1473078747  
 O,0,0.4495655764,-1.7214227516,-0.0287054035  
 C,0,-0.1274507003,-0.692613414,0.0362303692  
 C,0,-1.3038502523,-0.0556964148,-0.0175697006  
 Cl,0,-1.5954859588,1.6317234928,0.0859844737  
 Cl,0,-2.7109832946,-1.0493419802,-0.130980439  
 H,0,0.7244403917,1.3493473379,1.3775934981  
 H,0,0.9161410871,1.7073175106,-1.2141052786  
 H,0,2.8272481302,0.1109553005,-2.1841563927  
 H,0,3.8164397657,-1.3097504608,-0.2128173133  
 H,0,3.1004695851,0.371330607,1.7861618973  
 H,0,2.0428773578,-1.030109252,1.7179769629

### 2<sup>nd</sup> TS rearrangement (17) MPW1K/6-31G\*

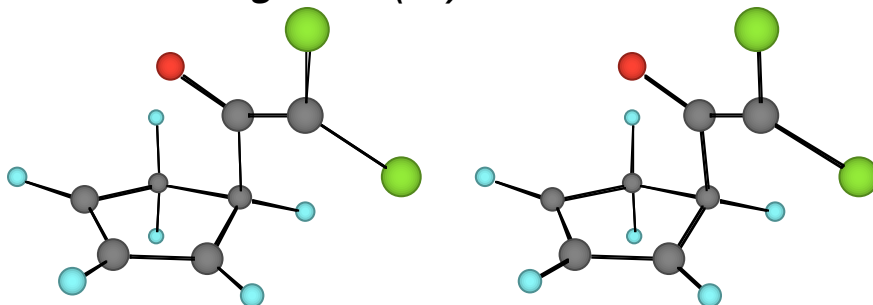

key distances OC 2.488, CC 2.728  
 E(RmPW+HF-PW91) = -1265.77209910

Zero-point correction= 0.116128 (Hartree/Particle)  
 Thermal correction to Energy= 0.124275  
 Thermal correction to Enthalpy= 0.125219  
 Thermal correction to Gibbs Free Energy= 0.081913  
 Sum of electronic and zero-point Energies= -1265.655971  
 Sum of electronic and thermal Energies= -1265.647824  
 Sum of electronic and thermal Enthalpies= -1265.646880  
 Sum of electronic and thermal Free Energies= -1265.690186

|       | E (Thermal)<br>KCal/Mol | CV<br>Cal/Mol-Kelvin | S<br>Cal/Mol-Kelvin |
|-------|-------------------------|----------------------|---------------------|
| Total | 77.984                  | 30.636               | 91.146              |

```

C,0,2.3666367549,0.1030711419,-1.1493398868
C,0,1.1123116181,0.7892399167,-0.6468846901
C,0,1.3070840624,0.8968467926,0.7977517362
C,0,2.2659471473,-0.0331701201,1.1957726889
C,0,2.7608248838,-0.6444051835,0.0722629209
C,0,0.0804520729,-0.3936670072,-0.4524328942
C,0,-1.1518172008,-0.0253822355,0.0590334121
O,0,0.530734661,-1.5321750093,-0.5809338619
Cl,0,-2.3415777828,-1.2189050669,0.336658818
Cl,0,-1.740768725,1.595370619,0.031086765
H,0,0.730505813,1.647844529,-1.1831507086
H,0,0.7312196359,1.5396424004,1.4421345366
H,0,2.4781420999,-0.3140798268,2.2134309282
H,0,3.4322068671,-1.4879832153,0.0674174068
H,0,3.1293890718,0.8493486341,-1.3890694287
H,0,2.2039138267,-0.5324866615,-2.0119464736

```

### Dichloro 2+2 TS (Similar to 10) MPW1K/6-31G\*

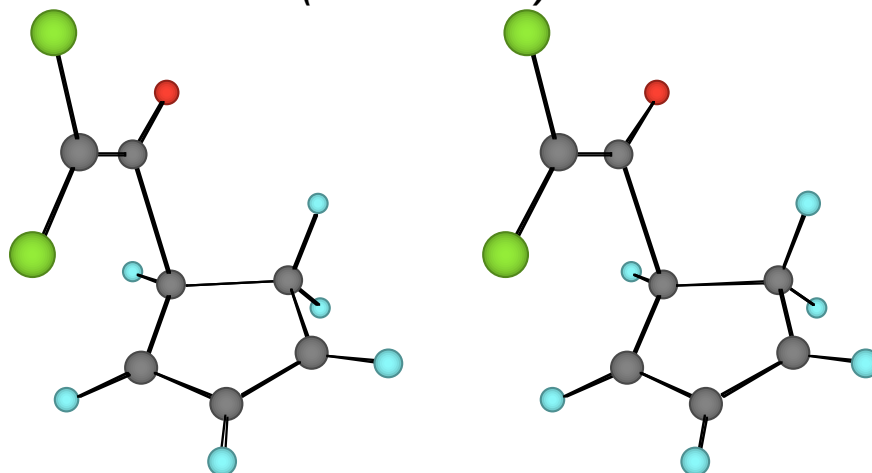

key distances 1.908 3.075  
E(RmPW+HF-PW91) = -1265.74180964

```

Zero-point correction=                0.113976 (Hartree/Particle)
Thermal correction to Energy=          0.123274
Thermal correction to Enthalpy=        0.124218
Thermal correction to Gibbs Free Energy= 0.077553
Sum of electronic and zero-point Energies= -1265.627834
Sum of electronic and thermal Energies= -1265.618536
Sum of electronic and thermal Enthalpies= -1265.617592
Sum of electronic and thermal Free Energies= -1265.664257

```

|       | E (Thermal) | CV             | S              |
|-------|-------------|----------------|----------------|
|       | KCal/Mol    | Cal/Mol-Kelvin | Cal/Mol-Kelvin |
| Total | 77.356      | 32.763         | 98.215         |

```

C,0,0.664933407,1.3186030414,-0.9056468857
C,0,1.8420224565,0.7433337946,-0.4417646029
C,0,2.2048697309,1.2816218661,0.8298016213
C,0,1.3530012522,2.2875343735,1.1184192026
C,0,0.3729626647,2.4766319568,0.0224062638
C,0,-0.8794958158,0.2223235119,-0.6783781661

```

O,0,-1.798993337,0.8733459278,-1.0795375581  
 C,0,-0.6788848066,-0.9874452022,-0.1159427709  
 Cl,0,0.7956455731,-1.7472621717,0.3209683509  
 Cl,0,-2.0966764921,-1.9139799488,0.2255805978  
 H,0,0.5021343205,1.4062102689,-1.9699660832  
 H,0,2.4318007172,0.0268326787,-0.9891376966  
 H,0,3.0204896109,0.9320132556,1.4400953799  
 H,0,1.3586519379,2.8770726823,2.0219347623  
 H,0,0.5779165929,3.4192008824,-0.4960587093  
 H,0,-0.6579741932,2.5373988073,0.3647327113

### **Cyclopentadiene (1) MPW1K/6-31+G(d,p)**

E(RmPW+HF-PW91) = -194.065760414

|                                              |                             |
|----------------------------------------------|-----------------------------|
| Zero-point correction=                       | 0.095375 (Hartree/Particle) |
| Thermal correction to Energy=                | 0.099446                    |
| Thermal correction to Enthalpy=              | 0.100390                    |
| Thermal correction to Gibbs Free Energy=     | 0.068821                    |
| Sum of electronic and zero-point Energies=   | -193.970385                 |
| Sum of electronic and thermal Energies=      | -193.966314                 |
| Sum of electronic and thermal Enthalpies=    | -193.965370                 |
| Sum of electronic and thermal Free Energies= | -193.996940                 |

|       | E (Thermal) | CV             | S              |
|-------|-------------|----------------|----------------|
|       | KCal/Mol    | Cal/Mol-Kelvin | Cal/Mol-Kelvin |
| Total | 62.403      | 15.041         | 66.444         |

C,0,0.60007971,0.8503739738,-0.6051259374  
 C,0,0.6949467299,0.7041456443,0.724079062  
 C,0,-0.1505921621,-0.4092216356,1.1458255257  
 C,0,-0.7555225793,-0.9346372184,0.0710390952  
 C,0,-0.3337802543,-0.1808039027,-1.1464717412  
 H,0,1.1048707409,1.584742978,-1.2109986645  
 H,0,1.2948687976,1.3039522083,1.3899536486  
 H,0,-0.2598576246,-0.7431979221,2.1654256597  
 H,0,-1.4403162824,-1.7665593138,0.0585236825  
 H,0,-1.1859197506,0.2713988503,-1.6609931687  
 H,0,0.1555654542,-0.8294779684,-1.877987184

### **diphenylketene (2) MPW1K/6-31+G(d,p)**

E(RmPW+HF-PW91) = -614.557526647

|                                              |                             |
|----------------------------------------------|-----------------------------|
| Zero-point correction=                       | 0.202031 (Hartree/Particle) |
| Thermal correction to Energy=                | 0.213714                    |
| Thermal correction to Enthalpy=              | 0.214658                    |
| Thermal correction to Gibbs Free Energy=     | 0.162254                    |
| Sum of electronic and zero-point Energies=   | -614.355495                 |
| Sum of electronic and thermal Energies=      | -614.343813                 |
| Sum of electronic and thermal Enthalpies=    | -614.342869                 |
| Sum of electronic and thermal Free Energies= | -614.395272                 |

|       | E (Thermal) | CV             | S              |
|-------|-------------|----------------|----------------|
|       | KCal/Mol    | Cal/Mol-Kelvin | Cal/Mol-Kelvin |
| Total | 134.107     | 45.076         | 110.292        |

C,0,2.0161898435,0.7841417439,0.0380096255  
 O,0,3.0951212623,1.2037625436,0.0583497561  
 C,0,0.7859593374,0.3056774293,0.0148171359  
 C,0,0.1303396351,0.0033601933,1.3048816774  
 C,0,-1.2311975688,0.2577286452,1.469442162  
 C,0,0.8478302543,-0.5187791956,2.379920303  
 C,0,-1.8536470631,-0.0028129977,2.6781805827  
 H,0,-1.7986572432,0.6653728319,0.6461000046  
 C,0,0.2255684821,-0.7606163372,3.5942156778  
 H,0,1.8971552291,-0.7501001803,2.2612133707  
 C,0,-1.1284286348,-0.5077997654,3.7481390366  
 H,0,-2.9091342424,0.1990445977,2.7873068659  
 H,0,0.7994135633,-1.1622979321,4.4162912262  
 H,0,-1.6156840449,-0.7060555067,4.6909936847  
 C,0,0.1410117882,0.1021745962,-1.2997659207  
 C,0,-0.6848221255,-1.0029104829,-1.5055628786  
 C,0,0.3521057227,0.9854600419,-2.3572991898  
 C,0,-1.2797791047,-1.2158458128,-2.7372522326  
 H,0,-0.8544831891,-1.6972366285,-0.6961168373  
 C,0,-0.2298972467,0.7589312351,-3.5942977184  
 H,0,0.9650041103,1.863256302,-2.2072560598  
 C,0,-1.0515729276,-0.3400521902,-3.7892370015  
 H,0,-1.9174315648,-2.0762025729,-2.8782976457  
 H,0,-0.0515461887,1.4531578164,-4.4021930361  
 H,0,-1.5135688805,-0.5109816956,-4.7499871778

### 4+2\_product (3) MPW1K/6-31+G(d,p)

E(RmPW+HF-PW91) = -808.651513331

|                                              |                             |
|----------------------------------------------|-----------------------------|
| Zero-point correction=                       | 0.304995 (Hartree/Particle) |
| Thermal correction to Energy=                | 0.319788                    |
| Thermal correction to Enthalpy=              | 0.320732                    |
| Thermal correction to Gibbs Free Energy=     | 0.261130                    |
| Sum of electronic and zero-point Energies=   | -808.346518                 |
| Sum of electronic and thermal Energies=      | -808.331725                 |
| Sum of electronic and thermal Enthalpies=    | -808.330781                 |
| Sum of electronic and thermal Free Energies= | -808.390383                 |

|       | E (Thermal) | CV             | S              |
|-------|-------------|----------------|----------------|
|       | KCal/Mol    | Cal/Mol-Kelvin | Cal/Mol-Kelvin |
| Total | 200.670     | 60.176         | 125.443        |

C,0,2.2227710651,1.0244456229,0.2677622391  
 C,0,2.9297224184,1.0451147101,-1.0750191383  
 C,0,3.648118925,-0.0727203925,-1.1626300453  
 C,0,3.3797153336,-0.8254381142,0.1178988135  
 C,0,3.2845369991,0.3104772663,1.1231582187  
 O,0,1.9926490765,-1.2559986161,0.0631765936  
 C,0,1.2420556729,-0.125980549,0.1389179882  
 C,0,-0.097533582,-0.1060852635,0.0777010753  
 H,0,1.8072470055,1.9581731585,0.6195575218  
 H,0,2.7659364711,1.7904352284,-1.836562933  
 H,0,4.2021740344,-0.4454927571,-2.0082210601  
 H,0,3.9820346218,-1.6949055486,0.3465841345  
 H,0,4.2008926633,0.883532641,1.2210545866  
 H,0,2.9210547299,-0.016717263,2.0951578164  
 C,0,-0.7956482187,1.1967981709,0.2402298608

C,0,-0.7447468291,1.9048270159,1.4384488954  
 C,0,-1.5442827958,1.7276431753,-0.8096797187  
 C,0,-1.3984630013,3.1211365746,1.5776397931  
 H,0,-0.1953459717,1.4884529322,2.2710965648  
 C,0,-2.1989474232,2.9406854262,-0.6739776319  
 H,0,-1.6079853053,1.1790544096,-1.738471709  
 C,0,-2.1256842969,3.6444312863,0.5203851386  
 H,0,-1.3461886539,3.6539860851,2.5160306213  
 H,0,-2.7673902403,3.3384892532,-1.5020403549  
 H,0,-2.6375351912,4.589473129,0.6269576049  
 C,0,-0.9350821109,-1.3044293938,-0.1327052667  
 C,0,-2.2436263951,-1.3258863644,0.3577859957  
 C,0,-0.4814529646,-2.4285194464,-0.8289267446  
 C,0,-3.0621279391,-2.4276516606,0.172955573  
 H,0,-2.6227534817,-0.4677505556,0.8924777573  
 C,0,-1.3040051962,-3.5260326063,-1.0191386127  
 H,0,0.5212313587,-2.4394436693,-1.2220401049  
 C,0,-2.5973657081,-3.5357193992,-0.5181035802  
 H,0,-4.0669341804,-2.4174889385,0.5698116077  
 H,0,-0.9303334599,-4.3797445412,-1.5659967054  
 H,0,-3.2350207311,-4.3946409863,-0.6670252158

### **2+2\_product (4) MPW1K/6-31+G(d,p)**

E(RmPW+HF-PW91) = -808.664448064

|                                              |                             |
|----------------------------------------------|-----------------------------|
| Zero-point correction=                       | 0.303475 (Hartree/Particle) |
| Thermal correction to Energy=                | 0.318841                    |
| Thermal correction to Enthalpy=              | 0.319785                    |
| Thermal correction to Gibbs Free Energy=     | 0.259064                    |
| Sum of electronic and zero-point Energies=   | -808.360974                 |
| Sum of electronic and thermal Energies=      | -808.345607                 |
| Sum of electronic and thermal Enthalpies=    | -808.344663                 |
| Sum of electronic and thermal Free Energies= | -808.405385                 |

|       | E (Thermal) | CV             | S              |
|-------|-------------|----------------|----------------|
|       | KCal/Mol    | Cal/Mol-Kelvin | Cal/Mol-Kelvin |
| Total | 200.076     | 61.376         | 127.799        |

C,0,-2.1776751003,-1.2782633259,-0.3272726875  
 C,0,-1.526148234,-0.0444792708,-0.9998559316  
 C,0,-2.4807469505,1.0486114461,-0.62647314  
 C,0,-3.5809164685,0.5879917079,-0.0388747859  
 C,0,-3.5929252775,-0.9064390408,0.1049186166  
 C,0,-1.1136298607,-1.1541905448,0.7437374379  
 O,0,-1.0217544906,-1.5968591055,1.8503058257  
 C,0,-0.2607967935,-0.1815783735,-0.0835556549  
 H,0,-2.091917392,-2.2175663669,-0.869526108  
 H,0,-1.3366507562,-0.0921819831,-2.0688427754  
 H,0,-2.2822714582,2.0909375843,-0.8235718533  
 H,0,-4.3983256937,1.2090597306,0.2970535439  
 H,0,-4.3516018379,-1.362398237,-0.5332212771  
 H,0,-3.797502122,-1.2308189855,1.1253563264  
 C,0,0.2580841509,1.0699230075,0.5848187854  
 C,0,0.6385964561,2.1548773252,-0.201274658  
 C,0,0.3821728646,1.1668354298,1.9650820375  
 C,0,1.1234424211,3.3146784284,0.3778394884  
 H,0,0.5579672856,2.0907919272,-1.2776163581



C,0,0.8720177095,2.3291954637,2.5456664682  
 H,0,0.0943616202,0.3333939119,2.5868150018  
 C,0,1.2423041529,3.4059493934,1.7578157432  
 H,0,1.411513142,4.1468161973,-0.2478884493  
 H,0,0.9610785302,2.3892997782,3.6205194629  
 H,0,1.6219090847,4.3091457423,2.2121529136  
 C,0,0.8841275414,-0.9505379797,-0.7294234878  
 C,0,1.2180610124,-0.7837783077,-2.0690839863  
 C,0,1.6620076271,-1.8040078281,0.0491221696  
 C,0,2.3015496696,-1.4531316539,-2.6184084588  
 H,0,0.6404538921,-0.1223296178,-2.6973259591  
 C,0,2.7416266654,-2.4765021121,-0.4999582836  
 H,0,1.418615457,-1.9417139439,1.0925636758  
 C,0,3.0661117577,-2.30430148,-1.8369773151  
 H,0,2.5457824488,-1.307593043,-3.6605019195  
 H,0,3.3297107317,-3.1367852262,0.1202753588  
 H,0,3.9073329305,-2.8282983322,-2.2657423322

### Dichloroketene (5) MPW1K/6-31+G\*\*

E(RmPW+HF-PW91) = -1071.72174234

|                                              |                             |
|----------------------------------------------|-----------------------------|
| Zero-point correction=                       | 0.016271 (Hartree/Particle) |
| Thermal correction to Energy=                | 0.021228                    |
| Thermal correction to Enthalpy=              | 0.022172                    |
| Thermal correction to Gibbs Free Energy=     | -0.013388                   |
| Sum of electronic and zero-point Energies=   | -1071.705471                |
| Sum of electronic and thermal Energies=      | -1071.700514                |
| Sum of electronic and thermal Enthalpies=    | -1071.699570                |
| Sum of electronic and thermal Free Energies= | -1071.735130                |

|       | E (Thermal) | CV             | S              |
|-------|-------------|----------------|----------------|
|       | KCal/Mol    | Cal/Mol-Kelvin | Cal/Mol-Kelvin |
| Total | 13.321      | 15.071         | 74.842         |

C,0,1.2112587129,-0.5270517753,-0.2366302426  
 C,0,0.0256013896,-0.0111340188,-0.0049696958  
 O,0,2.2545888115,-0.9810384476,-0.4404825313  
 Cl,0,-1.2903101578,-1.0308619728,0.3959433139  
 Cl,0,-0.207211672,1.6824750519,-0.1033868503

### Dichloro 2+2 product (7) MPW1K/6-31+G\*\*

E(RmPW+HF-PW91) = -1265.86034300

|                                              |                             |
|----------------------------------------------|-----------------------------|
| Zero-point correction=                       | 0.117635 (Hartree/Particle) |
| Thermal correction to Energy=                | 0.126147                    |
| Thermal correction to Enthalpy=              | 0.127092                    |
| Thermal correction to Gibbs Free Energy=     | 0.083098                    |
| Sum of electronic and zero-point Energies=   | -1265.742708                |
| Sum of electronic and thermal Energies=      | -1265.734196                |
| Sum of electronic and thermal Enthalpies=    | -1265.733251                |
| Sum of electronic and thermal Free Energies= | -1265.777245                |

|       | E (Thermal) | CV             | S              |
|-------|-------------|----------------|----------------|
|       | KCal/Mol    | Cal/Mol-Kelvin | Cal/Mol-Kelvin |
| Total | 79.159      | 31.406         | 92.592         |

C,0,-0.6403275934,-0.9075013505,-1.1249746804  
 C,0,-0.3981794713,0.6112005268,-0.9005989352  
 C,0,-1.7233118454,1.0663107525,-0.3724961889  
 C,0,-2.6518469821,0.1185929192,-0.4514342842  
 C,0,-2.1428901108,-1.1645504552,-1.0382761855  
 C,0,0.1237600688,-1.1574833458,0.1670168058  
 O,0,0.1980732653,-2.0561429918,0.9359865728  
 C,0,0.6628919205,0.2873395449,0.1778631229  
 Cl,0,2.2986315201,0.2849616581,-0.5166065213  
 Cl,0,0.6248183179,1.1585012114,1.6954219125  
 H,0,-0.1432959571,-1.3503857173,-1.9841404904  
 H,0,-0.014981032,1.2141581595,-1.7193592323  
 H,0,-1.8816805242,2.0621444135,0.0101465726  
 H,0,-3.6787036069,0.2459653335,-0.1426132097  
 H,0,-2.5805477505,-1.3543759542,-2.0190467878  
 H,0,-2.3646004143,-2.0306826346,-0.4153390127

### Dichloro 4+2 product (8) MPW1K/6-31+G\*\*

E(RmPW+HF-PW91) = -1265.83714634

|                                              |                             |
|----------------------------------------------|-----------------------------|
| Zero-point correction=                       | 0.119273 (Hartree/Particle) |
| Thermal correction to Energy=                | 0.127233                    |
| Thermal correction to Enthalpy=              | 0.128177                    |
| Thermal correction to Gibbs Free Energy=     | 0.085206                    |
| Sum of electronic and zero-point Energies=   | -1265.717873                |
| Sum of electronic and thermal Energies=      | -1265.709913                |
| Sum of electronic and thermal Enthalpies=    | -1265.708969                |
| Sum of electronic and thermal Free Energies= | -1265.751940                |

|       | E (Thermal)<br>KCal/Mol | CV<br>Cal/Mol-Kelvin | S<br>Cal/Mol-Kelvin |
|-------|-------------------------|----------------------|---------------------|
| Total | 79.840                  | 30.204               | 90.440              |

C,0,1.3337994121,0.6059368347,0.5034065639  
 C,0,2.0485760456,0.844125785,-0.8138478398  
 C,0,2.4250581511,-0.3458288706,-1.2786916306  
 C,0,1.9363250029,-1.3536468441,-0.2677390682  
 C,0,2.1348003796,-0.5978065644,1.0360047951  
 O,0,0.4804367731,-1.361623481,-0.3551914828  
 C,0,0.0900320093,-0.1524476298,0.0979455379  
 C,0,-1.1824994429,0.2261397068,0.1390510562  
 Cl,0,-1.6502131205,1.7719893589,0.7342744354  
 Cl,0,-2.4575191373,-0.7911270517,-0.3841550887  
 H,0,1.1722896305,1.4574438816,1.1502981774  
 H,0,2.116664767,1.8010208009,-1.3052071302  
 H,0,2.870145579,-0.5774505749,-2.2318859424  
 H,0,2.2695407634,-2.3792245931,-0.3510486662  
 H,0,3.1702991972,-0.3490679458,1.2436382303  
 H,0,1.6724649143,-1.0932274479,1.8869318118

**TS\_2+2 (10) MPW1K/6-31+G(d,p)**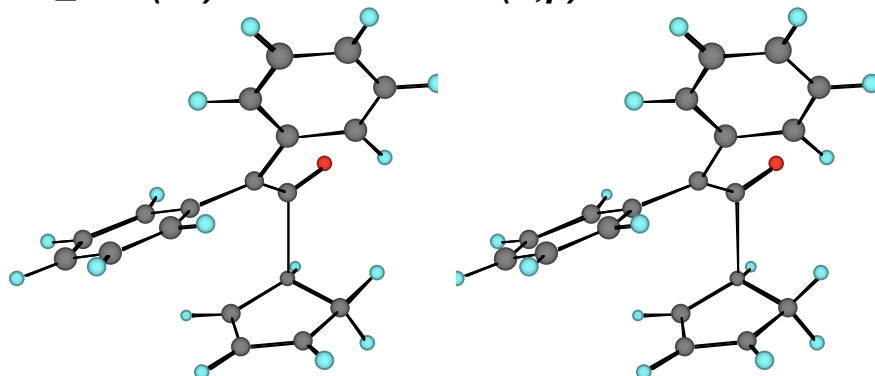

key distances 1.867 3.115  
 E(RmPW+HF-PW91) = -808.583348892

|                                              |                             |
|----------------------------------------------|-----------------------------|
| Zero-point correction=                       | 0.299237 (Hartree/Particle) |
| Thermal correction to Energy=                | 0.315064                    |
| Thermal correction to Enthalpy=              | 0.316008                    |
| Thermal correction to Gibbs Free Energy=     | 0.254551                    |
| Sum of electronic and zero-point Energies=   | -808.284112                 |
| Sum of electronic and thermal Energies=      | -808.268285                 |
| Sum of electronic and thermal Enthalpies=    | -808.267341                 |
| Sum of electronic and thermal Free Energies= | -808.328798                 |

|       | E (Thermal) | CV             | S              |
|-------|-------------|----------------|----------------|
|       | KCal/Mol    | Cal/Mol-Kelvin | Cal/Mol-Kelvin |
| Total | 197.706     | 62.616         | 129.347        |

C,0,-2.2796121247,-1.1711090492,-0.948431802  
 C,0,-2.6956670055,0.1674886231,-0.9625884163  
 C,0,-2.8654179332,0.6339511377,0.3695768189  
 C,0,-2.7292540701,-0.4162109465,1.2145291753  
 C,0,-2.5681662481,-1.6786852461,0.4508657792  
 C,0,-0.4243534733,-1.3785708699,-0.9751615761  
 O,0,-0.2313456929,-2.4777165638,-1.4032409162  
 C,0,0.3126805908,-0.3765629782,-0.3646949949  
 H,0,-2.4914270946,-1.797047021,-1.8022025743  
 H,0,-2.8915865348,0.7497776868,-1.8463158064  
 H,0,-3.0462036877,1.6586577396,0.6479458954  
 H,0,-2.7755001444,-0.3666930191,2.2910432632  
 H,0,-3.5239472247,-2.2155509824,0.4400301173  
 H,0,-1.8309542703,-2.3626969293,0.8628775519  
 C,0,0.0362232413,1.0319537484,-0.5703613406  
 C,0,-0.3991919049,1.5048084612,-1.8131516084  
 C,0,0.2031492864,1.9776245926,0.4571936271  
 C,0,-0.6783077903,2.8536346018,-2.0199423032  
 H,0,-0.457970752,0.8169800026,-2.6441485665  
 C,0,-0.069614116,3.3115045238,0.2515247488  
 H,0,0.5304840209,1.6393262603,1.4290061114  
 C,0,-0.5191773982,3.760388036,-0.9917587011  
 H,0,-1.0015663827,3.1885813343,-2.9951108486  
 H,0,0.0573937957,4.0139779805,1.0626285408  
 H,0,-0.727089398,4.8083454365,-1.149255749  
 C,0,1.4633023502,-0.822988643,0.4408392906  
 C,0,2.5895392533,-0.0037745109,0.5865509258  
 C,0,1.4975634815,-2.0754317224,1.0633537133

C,0,3.6829929929,-0.4099430033,1.3326678214  
 H,0,2.616269857,0.9548356373,0.0914845855  
 C,0,2.5932921865,-2.4815036802,1.8038806259  
 H,0,0.6590977849,-2.7469674753,0.9589201409  
 C,0,3.6939844773,-1.6502610391,1.9516405541  
 H,0,4.5376788892,0.2458113449,1.4176349167  
 H,0,2.5844073738,-3.455767607,2.2709552596  
 H,0,4.547884535,-1.9677100929,2.5312404638

### 1st\_TS (9) MPW1K/6-31+G(d,p)

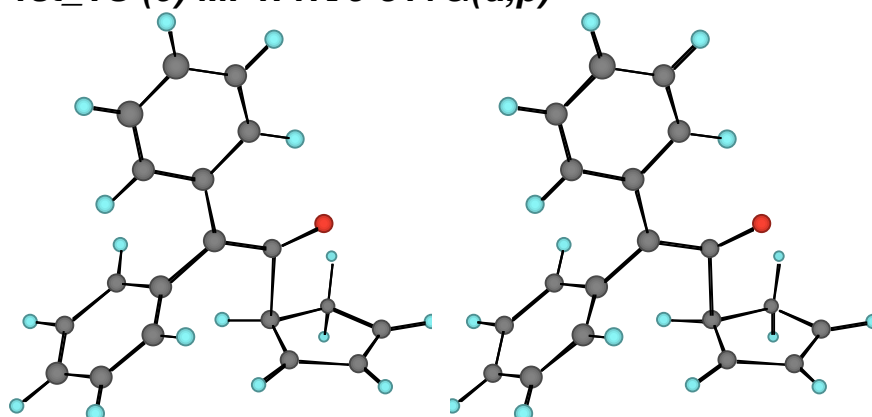

key distances OC 2.751 CC 1.945 CC 3.054  
 E(RmPW+HF-PW91) = -808.602438424

|                                              |                             |
|----------------------------------------------|-----------------------------|
| Zero-point correction=                       | 0.299594 (Hartree/Particle) |
| Thermal correction to Energy=                | 0.315387                    |
| Thermal correction to Enthalpy=              | 0.316331                    |
| Thermal correction to Gibbs Free Energy=     | 0.255005                    |
| Sum of electronic and zero-point Energies=   | -808.302844                 |
| Sum of electronic and thermal Energies=      | -808.287051                 |
| Sum of electronic and thermal Enthalpies=    | -808.286107                 |
| Sum of electronic and thermal Free Energies= | -808.347433                 |

|       | E (Thermal) | CV             | S              |
|-------|-------------|----------------|----------------|
|       | KCal/Mol    | Cal/Mol-Kelvin | Cal/Mol-Kelvin |
| Total | 197.908     | 62.636         | 129.072        |

C,0,-2.4180694319,0.378232305,-0.496521755  
 C,0,-2.5375249062,0.8401691285,0.8063986189  
 C,0,-3.5275402044,0.0811772561,1.4974099052  
 C,0,-4.0841446711,-0.7900532689,0.6264184513  
 C,0,-3.5648436322,-0.554799473,-0.7443148352  
 O,0,-1.5747523312,-1.8922918464,0.3945204933  
 C,0,-1.0443146831,-0.8512933872,0.1227858118  
 C,0,0.189938987,-0.2866639843,0.0199693412  
 H,0,-1.9427156533,0.9425176363,-1.2810520326  
 H,0,-1.9472577808,1.6351129556,1.2305990215  
 H,0,-3.7381427942,0.1529761702,2.5510453852  
 H,0,-4.818407319,-1.5416342918,0.8675004711  
 H,0,-4.3158607783,-0.0234161715,-1.3382278433  
 H,0,-3.3059982201,-1.4679488769,-1.2719261569  
 C,0,1.3697053039,-1.1639848706,0.1109472482  
 C,0,1.2766782975,-2.5423388938,0.3521854952  
 C,0,2.6542702474,-0.6222690175,-0.0352630014

```

C,0,2.4124672865,-3.3267944922,0.4491083349
H,0,0.3068641057,-2.9985104704,0.4639417688
C,0,3.7859067254,-1.4137921679,0.0623218275
H,0,2.7702824344,0.433783489,-0.2228063242
C,0,3.6765069223,-2.7736999162,0.3056992005
H,0,2.3046273771,-4.3854990046,0.6369716366
H,0,4.7595935913,-0.9597343312,-0.0537001827
H,0,4.5588404998,-3.3918150105,0.3804709108
C,0,0.4177642192,1.1500048008,-0.279062453
C,0,0.5995927486,2.0749001976,0.7470728271
C,0,0.5365531001,1.5966489311,-1.5948323236
C,0,0.8553160383,3.41032819,0.4702167629
H,0,0.5528871027,1.7326737417,1.7715316946
C,0,0.7874620448,2.9307872283,-1.8774121248
H,0,0.4368421882,0.8818631856,-2.3998987302
C,0,0.9432237498,3.8432683351,-0.8441049951
H,0,0.9914608492,4.1105628954,1.2815810215
H,0,0.8692020395,3.2562281267,-2.9043037514
H,0,1.1421121568,4.8822133224,-1.0620248549

```

### 2ndTS\_rearrangement (11) MPW1K/6-31+G(d,p)

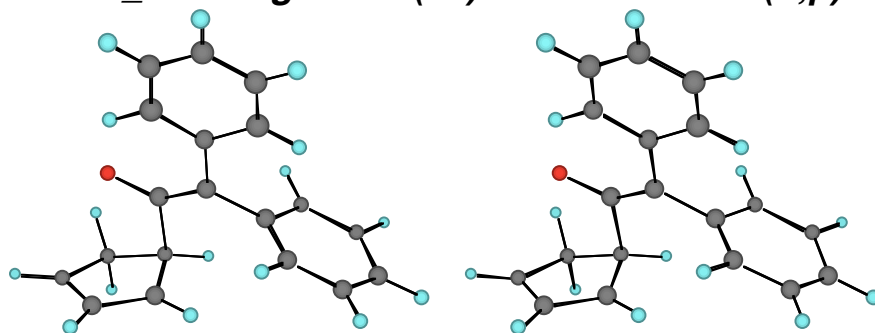

key distances OC 2.615, CC 2.739  
E(RmPW+HF-PW91) = -808.605862818

```

Zero-point correction=                0.301299 (Hartree/Particle)
Thermal correction to Energy=          0.316158
Thermal correction to Enthalpy=        0.317102
Thermal correction to Gibbs Free Energy= 0.258516
Sum of electronic and zero-point Energies= -808.304564
Sum of electronic and thermal Energies=   -808.289705
Sum of electronic and thermal Enthalpies= -808.288760
Sum of electronic and thermal Free Energies= -808.347346

```

|       | E (Thermal)<br>KCal/Mol | CV<br>Cal/Mol-Kelvin | S<br>Cal/Mol-Kelvin |
|-------|-------------------------|----------------------|---------------------|
| Total | 198.392                 | 60.835               | 123.304             |

```

C,0,2.2400313077,0.8989435452,-2.8233636157
C,0,1.4239661312,1.159652981,-1.5741948676
C,0,2.3288409449,0.8679551807,-0.4720388848
C,0,3.3907921737,0.0818231191,-0.9451057458
C,0,3.2783303467,-0.0261653723,-2.3005699492
C,0,0.6257008968,-0.195682771,-1.2770167847
C,0,-0.1693894662,-0.1990045286,-0.1222947948
O,0,0.9255251676,-1.1335428046,-2.0221252848
H,0,0.8294611383,2.0598640774,-1.5226828382

```

```

H,0,2.1730770269,1.18672726,0.5438647356
H,0,4.11157596,-0.4271604979,-0.3277408968
H,0,3.8982259631,-0.6466711559,-2.9283825326
H,0,2.7103292399,1.8283910959,-3.1573778678
H,0,1.6656036913,0.4785468779,-3.6415345259
C,0,-0.5009740967,1.0776811911,0.5642247916
C,0,-1.3004928055,2.0372482953,-0.0551460806
C,0,-0.0679441128,1.3278333046,1.866987999
C,0,-1.6277314867,3.2210811925,0.5897576618
H,0,-1.6769841535,1.8432421658,-1.0498169034
C,0,-0.3968750686,2.5068477928,2.5167375365
H,0,0.526304473,0.5797053833,2.3736108086
C,0,-1.1739341224,3.4620764355,1.8772127606
H,0,-2.2471258992,3.950315732,0.0880789849
H,0,-0.0471787672,2.6788322896,3.5243127149
H,0,-1.4305468839,4.3816836615,2.3818540843
C,0,-0.8987253369,-1.3920610805,0.3092912779
C,0,-1.8711139808,-1.3029758391,1.3187906484
C,0,-0.6445692326,-2.6656470381,-0.2294957235
C,0,-2.5345075931,-2.4240012129,1.7838076298
H,0,-2.1131749094,-0.3420951514,1.7444785274
C,0,-1.3048962142,-3.7827849767,0.2477613007
H,0,0.0675704429,-2.7550301572,-1.0319153148
C,0,-2.2527539242,-3.6747370531,1.2558132907
H,0,-3.2784607036,-2.316999878,2.5598856721
H,0,-1.0834378094,-4.748809081,-0.1826377361
H,0,-2.7719663109,-4.5506991785,1.6160546645

```

### Dichloro 1st TS (16) MPW1K/6-31+G\*\*

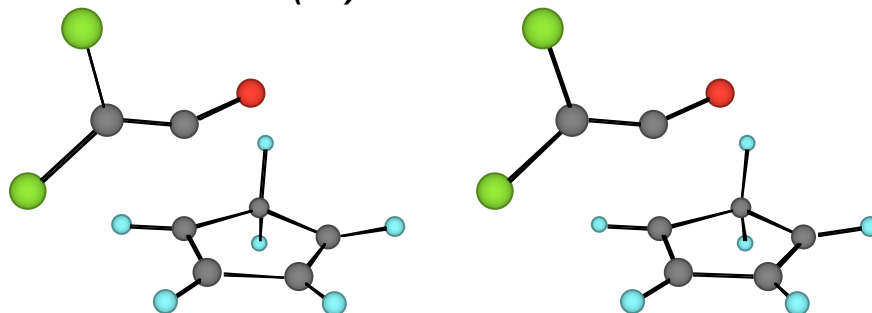

key distances CC 2.172, CC 3.052, OC 2.879  
 E(RmPW+HF-PW91) = -1265.78145400

```

Zero-point correction=                0.113431 (Hartree/Particle)
Thermal correction to Energy=          0.122716
Thermal correction to Enthalpy=        0.123660
Thermal correction to Gibbs Free Energy= 0.077805
Sum of electronic and zero-point Energies= -1265.668023
Sum of electronic and thermal Energies= -1265.658738
Sum of electronic and thermal Enthalpies= -1265.657794
Sum of electronic and thermal Free Energies= -1265.703649

```

|       | E (Thermal) | CV             | S              |
|-------|-------------|----------------|----------------|
|       | KCal/Mol    | Cal/Mol-Kelvin | Cal/Mol-Kelvin |
| Total | 77.005      | 33.270         | 96.509         |

```

C,0,1.3291002112,0.7537417309,0.7064255008
C,0,1.489345294,0.9928270028,-0.6339208147

```

```

C,0,2.5485284518,0.1654759944,-1.1470132739
C,0,3.0639458808,-0.5535642789,-0.1319879165
C,0,2.4097675353,-0.1747073695,1.1485570525
O,0,0.4378679987,-1.7284883178,-0.0324967457
C,0,-0.1378027609,-0.6987392151,0.0319431348
C,0,-1.3107181686,-0.055135874,-0.0180555835
Cl,0,-1.5910869875,1.6334744345,0.0864109835
Cl,0,-2.7224854227,-1.0411549657,-0.1307527794
H,0,0.7286432315,1.3419255609,1.3793327008
H,0,0.9114688179,1.6935674449,-1.2141975779
H,0,2.8335870787,0.1054551827,-2.1837992785
H,0,3.8393376458,-1.2979033249,-0.2102056962
H,0,3.1071682462,0.3700603104,1.7926047588
H,0,2.0545833022,-1.034017545,1.7143609929

```

### Dichloro 2<sup>nd</sup> TS rearrangement (17) MPW1K/6-31+G\*\*

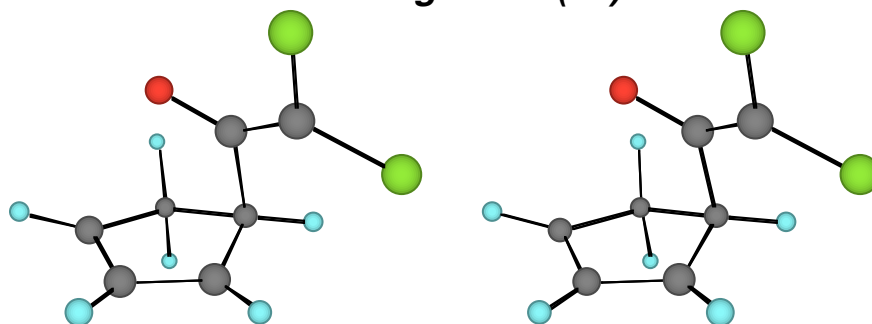

key distances 2.438 CO, 2.780 CC  
E(RmPW+HF-PW91) = -1265.79092128

|                                              |                             |
|----------------------------------------------|-----------------------------|
| Zero-point correction=                       | 0.115554 (Hartree/Particle) |
| Thermal correction to Energy=                | 0.123736                    |
| Thermal correction to Enthalpy=              | 0.124680                    |
| Thermal correction to Gibbs Free Energy=     | 0.081281                    |
| Sum of electronic and zero-point Energies=   | -1265.675367                |
| Sum of electronic and thermal Energies=      | -1265.667185                |
| Sum of electronic and thermal Enthalpies=    | -1265.666241                |
| Sum of electronic and thermal Free Energies= | -1265.709641                |

|       | E (Thermal)<br>KCal/Mol | CV<br>Cal/Mol-Kelvin | S<br>Cal/Mol-Kelvin |
|-------|-------------------------|----------------------|---------------------|
| Total | 77.646                  | 30.756               | 91.342              |

```

C,0,2.360569492,0.1066097766,-1.1435999401
C,0,1.1134239395,0.7967443891,-0.6278592132
C,0,1.3334503671,0.9148630667,0.8130457169
C,0,2.2855107352,-0.0208754381,1.2035867471
C,0,2.7517397593,-0.6498614303,0.0718724948
C,0,0.085370133,-0.3883529193,-0.4206170186
C,0,-1.1636789239,-0.0318164531,0.0415109759
O,0,0.5570483361,-1.527355966,-0.5247690259
Cl,0,-2.3530543708,-1.2284713592,0.298664935
Cl,0,-1.7510322405,1.588841654,0.0176731766
H,0,0.7228938579,1.6517567968,-1.1631723263
H,0,0.7609970157,1.5566605612,1.4622216136
H,0,2.5066141421,-0.3033871992,2.2185417635
H,0,3.4044527532,-1.5080152769,0.0617131404

```

H,0,3.1258697582,0.8521944364,-1.3752454684  
 H,0,2.1939451635,-0.5205225524,-2.0112929901

### Dichloro 2+2 TS (similar to 10) mPW1K

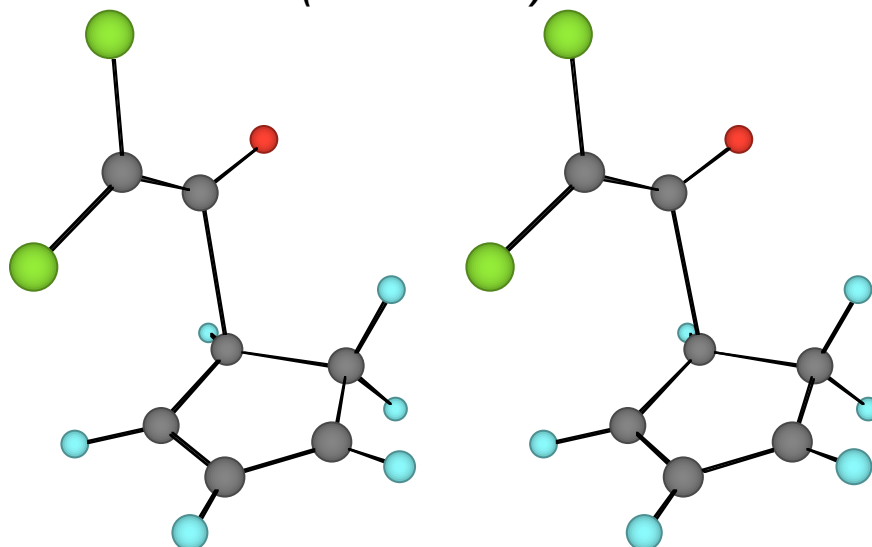

key distances 1.947, 3.100  
 E(RmPW+HF-PW91) = -1265.76116415

|                                              |                             |
|----------------------------------------------|-----------------------------|
| Zero-point correction=                       | 0.113247 (Hartree/Particle) |
| Thermal correction to Energy=                | 0.122634                    |
| Thermal correction to Enthalpy=              | 0.123578                    |
| Thermal correction to Gibbs Free Energy=     | 0.076632                    |
| Sum of electronic and zero-point Energies=   | -1265.647917                |
| Sum of electronic and thermal Energies=      | -1265.638530                |
| Sum of electronic and thermal Enthalpies=    | -1265.637586                |
| Sum of electronic and thermal Free Energies= | -1265.684532                |

|       | E (Thermal) | CV             | S              |
|-------|-------------|----------------|----------------|
|       | KCal/Mol    | Cal/Mol-Kelvin | Cal/Mol-Kelvin |
| Total | 76.954      | 33.031         | 98.807         |

C,0,-0.3841324967,-0.5375288496,-1.6259990407  
 C,0,-1.3358961414,0.4612912817,-1.4875943652  
 C,0,-2.5336321994,-0.0568332282,-0.9051296169  
 C,0,-2.4012008348,-1.3960644943,-0.7920763914  
 C,0,-1.0861023054,-1.8379351576,-1.3136934741  
 C,0,1.0002757906,-0.4938165018,-0.2583977659  
 O,0,1.7100258625,-1.4203215593,-0.5134557479  
 C,0,0.8861778899,0.4731237741,0.6736274733  
 Cl,0,-0.2138582284,1.785139292,0.7503412088  
 Cl,0,2.0133655179,0.3981252998,1.9810736709  
 H,0,0.3584644908,-0.4681912709,-2.4067592989  
 H,0,-1.2092671964,1.4796705253,-1.8159200831  
 H,0,-3.3850024956,0.5328616361,-0.6099084325  
 H,0,-3.1325159205,-2.0668988282,-0.3691303536  
 H,0,-1.2264894282,-2.4086837123,-2.2372732723  
 H,0,-0.5499584883,-2.4951048816,-0.6318364458



**Cyclopentadiene (1) B3LYP/6-31G(d)**

E(RB+HF-LYP) = -194.101058102

|                                              |                             |
|----------------------------------------------|-----------------------------|
| Zero-point correction=                       | 0.092894 (Hartree/Particle) |
| Thermal correction to Energy=                | 0.097037                    |
| Thermal correction to Enthalpy=              | 0.097981                    |
| Thermal correction to Gibbs Free Energy=     | 0.066297                    |
| Sum of electronic and zero-point Energies=   | -194.008164                 |
| Sum of electronic and thermal Energies=      | -194.004021                 |
| Sum of electronic and thermal Enthalpies=    | -194.003077                 |
| Sum of electronic and thermal Free Energies= | -194.034761                 |

|       | E (Thermal) | CV             | S              |
|-------|-------------|----------------|----------------|
|       | KCal/Mol    | Cal/Mol-Kelvin | Cal/Mol-Kelvin |
| Total | 60.892      | 15.532         | 66.686         |

C,0,0.6060113819,0.8584337704,-0.6085373113  
 C,0,0.6994883093,0.7087826711,0.7287459978  
 C,0,-0.151571919,-0.4119606018,1.1532588261  
 C,0,-0.761654919,-0.942830538,0.0737003299  
 C,0,-0.3364714453,-0.1822536595,-1.1556434048  
 H,0,1.1132278349,1.5965117921,-1.2193869712  
 H,0,1.3017843824,1.309771887,1.4025751874  
 H,0,-0.2587531789,-0.7445209875,2.1808302064  
 H,0,-1.4508669347,-1.7794626404,0.0596005501  
 H,0,-1.1937654504,0.2708997447,-1.6772984333  
 H,0,0.1535649003,-0.8342296489,-1.8954671653

**Diphenylketene (2) B3LYP/6-31G(d)**

E(RB+HF-LYP) = -614.708265406

|                                              |                             |
|----------------------------------------------|-----------------------------|
| Zero-point correction=                       | 0.196318 (Hartree/Particle) |
| Thermal correction to Energy=                | 0.208257                    |
| Thermal correction to Enthalpy=              | 0.209201                    |
| Thermal correction to Gibbs Free Energy=     | 0.156467                    |
| Sum of electronic and zero-point Energies=   | -614.511947                 |
| Sum of electronic and thermal Energies=      | -614.500008                 |
| Sum of electronic and thermal Enthalpies=    | -614.499064                 |
| Sum of electronic and thermal Free Energies= | -614.551798                 |

|       | E (Thermal) | CV             | S              |
|-------|-------------|----------------|----------------|
|       | KCal/Mol    | Cal/Mol-Kelvin | Cal/Mol-Kelvin |
| Total | 130.683     | 46.459         | 110.988        |

C,0,2.0196603437,0.7808296663,0.0403690462  
 O,0,3.1121886357,1.2032166174,0.0622069309  
 C,0,0.7792435463,0.3012669959,0.0155752676  
 C,0,0.1227021878,-0.0026733611,1.3170484719  
 C,0,-1.2543507251,0.2235965325,1.485948488  
 C,0,0.8590414616,-0.4946435079,2.4082458255  
 C,0,-1.8711542118,-0.0378796898,2.7079892337  
 H,0,-1.8377652513,0.6095068033,0.6556908418  
 C,0,0.2421149786,-0.7352143899,3.6349921407  
 H,0,1.9202875438,-0.7000125785,2.2898774925  
 C,0,-1.1269675397,-0.5129670267,3.7902791375  
 H,0,-2.9376914131,0.1412154575,2.8169240183

H,0,0.8319663566,-1.1129757663,4.4659890561  
H,0,-1.6101469817,-0.7116404417,4.7428596197  
C,0,0.1347071259,0.1021920583,-1.3119035393  
C,0,-0.7253654534,-0.9889746652,-1.5255160384  
C,0,0.3862211492,0.9760719958,-2.3833588704  
C,0,-1.3147292317,-1.1938204322,-2.7716654931  
H,0,-0.9260643574,-1.6780281389,-0.7109289131  
C,0,-0.1890120814,0.7557360547,-3.6339338838  
H,0,1.028618998,1.8400885123,-2.2309407707  
C,0,-1.0463702099,-0.3272771302,-3.8337197809  
H,0,-1.9790350554,-2.0420779928,-2.9151937324  
H,0,0.021951447,1.4430973944,-4.4489264982  
H,0,-1.504078414,-0.4923647716,-4.8051065925

### 4+2 Product (3) B3LYP/6-31G(d)

E(RB+HF-LYP) = -808.819403440

|                                              |                            |
|----------------------------------------------|----------------------------|
| Zero-point correction=                       | .296300 (Hartree/Particle) |
| Thermal correction to Energy=                | .311471                    |
| Thermal correction to Enthalpy=              | .312415                    |
| Thermal correction to Gibbs Free Energy=     | .252373                    |
| Sum of electronic and zero-point Energies=   | -808.523103                |
| Sum of electronic and thermal Energies=      | -808.507932                |
| Sum of electronic and thermal Enthalpies=    | -808.506988                |
| Sum of electronic and thermal Free Energies= | -808.567031                |

|       | E (Thermal) | CV             | S              |
|-------|-------------|----------------|----------------|
|       | KCal/Mol    | Cal/Mol-Kelvin | Cal/Mol-Kelvin |
| Total | 195.451     | 62.370         | 126.370        |

C,0,2.2488217801,1.0273911245,0.2808560593  
C,0,2.9649700438,1.0339792303,-1.0729497055  
C,0,3.6794189323,-0.0975032907,-1.1534827752  
C,0,3.4096440182,-0.8457253029,0.1413350327  
C,0,3.3188506806,0.3058911174,1.1507330353  
O,0,1.9927966753,-1.2773853957,0.096197503  
C,0,1.2442590699,-0.1243958129,0.1626419871  
C,0,-0.1066711749,-0.0985169847,0.0859087236  
H,0,1.844202906,1.9739964232,0.6286416796  
H,0,2.8018523818,1.7786312636,-1.8443101279  
H,0,4.2331341148,-0.4853274154,-2.0008653051  
H,0,4.003178435,-1.7277551905,0.3745845755  
H,0,4.2434200411,0.8788288158,1.2476022689  
H,0,2.9541229881,-0.0139981618,2.1320683923  
C,0,-0.8109341287,1.2132005666,0.2430067701  
C,0,-0.7159130034,1.9630172416,1.4264358699  
C,0,-1.6086507784,1.719354768,-0.7978272481  
C,0,-1.3715793311,3.1892179134,1.5574974037  
H,0,-0.1310199181,1.5699234406,2.2541092677  
C,0,-2.2668756503,2.9412862795,-0.6684211873  
H,0,-1.7062145976,1.1445797562,-1.7148504123  
C,0,-2.1479264192,3.6839858462,0.509241228  
H,0,-1.2832161006,3.7514112873,2.4838154148  
H,0,-2.8722538981,3.31663194,-1.4896903494  
H,0,-2.6621219074,4.6361167648,0.6103569637  
C,0,-0.9440649902,-1.3079358907,-0.1378573117  
C,0,-2.2532360647,-1.3578605009,0.3792296438

C,0,-0.4905704481,-2.4191504087,-0.8754155108  
 C,0,-3.069241481,-2.4697557972,0.178634439  
 H,0,-2.6319178029,-0.5147221402,0.9486556798  
 C,0,-1.3101700365,-3.5273773099,-1.0791351657  
 H,0,0.5105324328,-2.4102823718,-1.2883484025  
 C,0,-2.603280925,-3.5625719078,-0.5533181516  
 H,0,-4.0728236422,-2.4801595588,0.5968240024  
 H,0,-0.93535023,-4.3684309765,-1.657576298  
 H,0,-3.238999164,-4.4295459984,-0.713276193

## 2+2 Product (4) B3LYP/6-31G(d)

E(RB+HF-LYP) = -808.830818866

|                                              |                             |
|----------------------------------------------|-----------------------------|
| Zero-point correction=                       | 0.295026 (Hartree/Particle) |
| Thermal correction to Energy=                | 0.310723                    |
| Thermal correction to Enthalpy=              | 0.311667                    |
| Thermal correction to Gibbs Free Energy=     | 0.250760                    |
| Sum of electronic and zero-point Energies=   | -808.535792                 |
| Sum of electronic and thermal Energies=      | -808.520096                 |
| Sum of electronic and thermal Enthalpies=    | -808.519152                 |
| Sum of electronic and thermal Free Energies= | -808.580059                 |

|       | E (Thermal) | CV             | S              |
|-------|-------------|----------------|----------------|
|       | KCal/Mol    | Cal/Mol-Kelvin | Cal/Mol-Kelvin |
| Total | 194.981     | 63.357         | 128.190        |

C,0,-2.211265789,-1.2907418365,-0.3045212849  
 C,0,-1.5423919545,-0.0696357304,-1.0184209269  
 C,0,-2.5035050115,1.0484939134,-0.6963493146  
 C,0,-3.6107018232,0.6191170073,-0.0806585342  
 C,0,-3.6297481589,-0.8781645456,0.1394788824  
 C,0,-1.1212712577,-1.1704326831,0.763394924  
 O,0,-1.0199255291,-1.6169336173,1.8804193101  
 C,0,-0.261063105,-0.1931163956,-0.0833122128  
 H,0,-2.1610687325,-2.246628256,-0.8350844576  
 H,0,-1.3371673973,-0.1625190851,-2.0881042056  
 H,0,-2.2998740047,2.0846307132,-0.9475507889  
 H,0,-4.4325522118,1.2597652637,0.2281356587  
 H,0,-4.4100008776,-1.366184425,-0.4610887543  
 H,0,-3.8189510433,-1.1533156672,1.1851878801  
 C,0,0.2525884599,1.0765419818,0.5882986068  
 C,0,0.5941610331,2.1874022519,-0.1978348725  
 C,0,0.4196020819,1.1598941834,1.9760583407  
 C,0,1.0804964872,3.3552316547,0.3870200809  
 H,0,0.483698532,2.1365365281,-1.2783906909  
 C,0,0.908870488,2.3303829053,2.5615190536  
 H,0,0.1633139047,0.3092943999,2.5979914022  
 C,0,1.2395676155,3.4314288378,1.7727096176  
 H,0,1.3371716169,4.2053113942,-0.2400275985  
 H,0,1.0297502856,2.3774660605,3.6407981397  
 H,0,1.6198944578,4.3406373681,2.2306842252  
 C,0,0.9017718398,-0.9630155449,-0.7308575796  
 C,0,1.2671470151,-0.757650622,-2.0683192544  
 C,0,1.6624574132,-1.8552154272,0.039429551  
 C,0,2.3597595043,-1.4270464253,-2.6217855291  
 H,0,0.7050799954,-0.0653720343,-2.6885131425  
 C,0,2.7519086767,-2.5274319658,-0.5146801219

H,0,1.3956868281,-2.0257814118,1.0780453749  
 C,0,3.105130001,-2.3173587879,-1.8483646535  
 H,0,2.6260711471,-1.2511521934,-3.6608618875  
 H,0,3.3241336183,-3.2178809202,0.0994060728  
 H,0,3.9531370197,-2.8414354234,-2.280810345

### Dichloroketene (5) B3LYP/6-31G\*

E(RB+HF-LYP) = -1071.76036588

|                                              |                             |
|----------------------------------------------|-----------------------------|
| Zero-point correction=                       | 0.015367 (Hartree/Particle) |
| Thermal correction to Energy=                | 0.020476                    |
| Thermal correction to Enthalpy=              | 0.021420                    |
| Thermal correction to Gibbs Free Energy=     | -0.014464                   |
| Sum of electronic and zero-point Energies=   | -1071.744999                |
| Sum of electronic and thermal Energies=      | -1071.739890                |
| Sum of electronic and thermal Enthalpies=    | -1071.738946                |
| Sum of electronic and thermal Free Energies= | -1071.774829                |

|       | E (Thermal)<br>KCal/Mol | CV<br>Cal/Mol-Kelvin | S<br>Cal/Mol-Kelvin |
|-------|-------------------------|----------------------|---------------------|
| Total | 12.849                  | 15.525               | 75.524              |

O,0,-2.2692216631,-0.8142460661,0.7414229189  
 C,0,-1.2164770048,-0.4364993103,0.3974462256  
 C,0,-0.0276786011,-0.0099346254,0.0090149994  
 Cl,0,0.2062343955,1.666458159,-0.3879199203  
 Cl,0,1.3007483657,-1.1257186212,-0.1044418857

### Dichloro 2+2 product (7) B3LYP/6-31G\*

E(RB+HF-LYP) = -1265.91522109

|                                              |                             |
|----------------------------------------------|-----------------------------|
| Zero-point correction=                       | 0.113797 (Hartree/Particle) |
| Thermal correction to Energy=                | 0.122590                    |
| Thermal correction to Enthalpy=              | 0.123534                    |
| Thermal correction to Gibbs Free Energy=     | 0.078991                    |
| Sum of electronic and zero-point Energies=   | -1265.801424                |
| Sum of electronic and thermal Energies=      | -1265.792631                |
| Sum of electronic and thermal Enthalpies=    | -1265.791687                |
| Sum of electronic and thermal Free Energies= | -1265.836230                |

|       | E (Thermal)<br>KCal/Mol | CV<br>Cal/Mol-Kelvin | S<br>Cal/Mol-Kelvin |
|-------|-------------------------|----------------------|---------------------|
| Total | 76.927                  | 32.607               | 93.749              |

C,0,-0.6513981568,-0.9154480862,-1.1432616893  
 C,0,-0.4071184016,0.6189740052,-0.9133949822  
 C,0,-1.7457712323,1.0843185081,-0.3970921472  
 C,0,-2.6814595401,0.1313034209,-0.4675408041  
 C,0,-2.1696237493,-1.1722740904,-1.0377441877  
 C,0,0.1386445984,-1.1833693769,0.1507519356  
 O,0,0.230408655,-2.1023147443,0.910671957  
 C,0,0.6617387193,0.2859772721,0.1792970175  
 Cl,0,2.3390854647,0.3159292611,-0.5123224429  
 Cl,0,0.6074065704,1.1500804215,1.7387488771  
 H,0,-0.1713830936,-1.3560092076,-2.0209367774  
 H,0,-0.0094076285,1.2220436923,-1.7334373307

H,0,-1.9030437433,2.0923712116,-0.0281887323  
 H,0,-3.7169547848,0.262439582,-0.1660080266  
 H,0,-2.6160900053,-1.3874324091,-2.0178986633  
 H,0,-2.3868280058,-2.033949438,-0.3942463631

### Dichloro 4+2 Product (8) B3LYP/6-31G\*

E(RB+HF-LYP) = -1265.89248550

|                                              |                             |
|----------------------------------------------|-----------------------------|
| Zero-point correction=                       | 0.115353 (Hartree/Particle) |
| Thermal correction to Energy=                | 0.123591                    |
| Thermal correction to Enthalpy=              | 0.124535                    |
| Thermal correction to Gibbs Free Energy=     | 0.081055                    |
| Sum of electronic and zero-point Energies=   | -1265.777132                |
| Sum of electronic and thermal Energies=      | -1265.768894                |
| Sum of electronic and thermal Enthalpies=    | -1265.767950                |
| Sum of electronic and thermal Free Energies= | -1265.811431                |

|       | E (Thermal)<br>KCal/Mol | CV<br>Cal/Mol-Kelvin | S<br>Cal/Mol-Kelvin |
|-------|-------------------------|----------------------|---------------------|
| Total | 77.555                  | 31.489               | 91.513              |

C,0,1.3487685896,0.6106634422,0.5025372792  
 C,0,2.0751894191,0.849903168,-0.823391835  
 C,0,2.4562317152,-0.3480467693,-1.2900685272  
 C,0,1.9678723099,-1.365271199,-0.2740537411  
 C,0,2.1596605047,-0.6051144531,1.0443216173  
 O,0,0.480551691,-1.3784794002,-0.3614978506  
 C,0,0.0895055867,-0.1541177826,0.0981307264  
 C,0,-1.1924000898,0.2285192332,0.1403479099  
 Cl,0,-1.6694366457,1.7981062623,0.7447859127  
 Cl,0,-2.4893059943,-0.8046870143,-0.3848315129  
 H,0,1.1895190349,1.4679704401,1.1527736906  
 H,0,2.1404449783,1.8125294457,-1.3179589348  
 H,0,2.9057048224,-0.5832693003,-2.2477113157  
 H,0,2.2946340477,-2.3992325624,-0.3605071872  
 H,0,3.1998628161,-0.3523994138,1.2594959517  
 H,0,1.6950774405,-1.1051044609,1.8997252269

### 1st\_TS (12) B3LYP/6-31G(d)

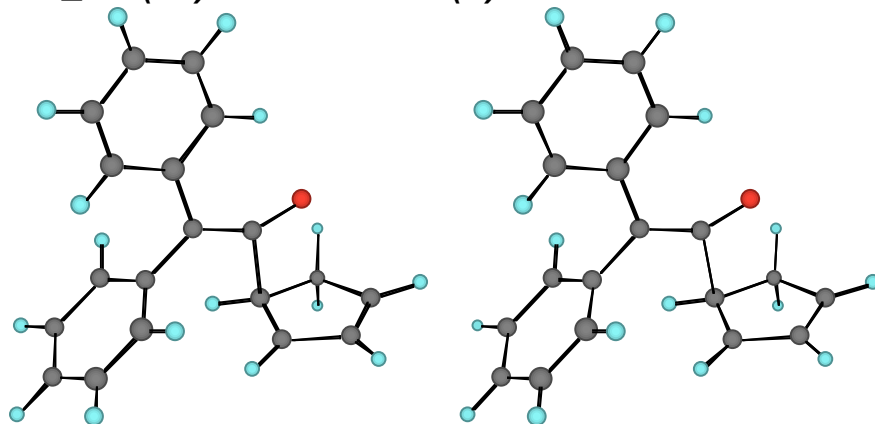

E(RB+HF-LYP) = -808.787217876

|                        |                             |
|------------------------|-----------------------------|
| Zero-point correction= | 0.291515 (Hartree/Particle) |
|------------------------|-----------------------------|

|                                              |             |
|----------------------------------------------|-------------|
| Thermal correction to Energy=                | 0.307632    |
| Thermal correction to Enthalpy=              | 0.308576    |
| Thermal correction to Gibbs Free Energy=     | 0.246551    |
| Sum of electronic and zero-point Energies=   | -808.495703 |
| Sum of electronic and thermal Energies=      | -808.479586 |
| Sum of electronic and thermal Enthalpies=    | -808.478642 |
| Sum of electronic and thermal Free Energies= | -808.540667 |

|       | E (Thermal)<br>KCal/Mol | CV<br>Cal/Mol-Kelvin | S<br>Cal/Mol-Kelvin |
|-------|-------------------------|----------------------|---------------------|
| Total | 193.042                 | 64.361               | 130.543             |

C,0,2.4224001946,-0.4459040534,0.3370244007  
 C,0,2.6554784443,-0.2540329039,-1.0385338914  
 C,0,3.2577900442,-1.4247596738,-1.5931668029  
 C,0,3.5171545678,-2.305297632,-0.5837782172  
 C,0,3.2123336269,-1.6779255537,0.7421325939  
 O,0,0.7720634111,-2.3768078842,-0.073251471  
 C,0,0.6823778767,-1.1672793746,0.0229399132  
 C,0,-0.2944332654,-0.1941013023,0.0340384595  
 H,0,2.2733765203,0.3843416619,1.0166631182  
 H,0,2.369610304,0.6297755457,-1.594793412  
 H,0,3.4236887769,-1.596344196,-2.6504808796  
 H,0,3.919289293,-3.3057177357,-0.6990937089  
 H,0,4.1470979699,-1.3487324256,1.224657294  
 H,0,2.6961358147,-2.3469771127,1.433300513  
 C,0,-1.7095691195,-0.6063464924,0.1723196  
 C,0,-2.1124344505,-1.9598112203,0.2477789633  
 C,0,-2.7306538326,0.3706340149,0.216335136  
 C,0,-3.4569503778,-2.306389027,0.346348024  
 H,0,-1.3619189702,-2.7403432253,0.2297276444  
 C,0,-4.0736103339,0.0153775163,0.3165513817  
 H,0,-2.4690005791,1.4215091619,0.1615771184  
 C,0,-4.4511524223,-1.3261556563,0.3825806067  
 H,0,-3.7286575682,-3.3580595872,0.4010228329  
 H,0,-4.8288712948,0.7974313216,0.3431060556  
 H,0,-5.498890836,-1.6032009132,0.4635256649  
 C,0,0.0152551226,1.2699291556,0.0484413394  
 C,0,0.1240985746,1.9989464108,-1.1470546354  
 C,0,0.1448158611,1.9700320886,1.2606377402  
 C,0,0.3826180632,3.3716975476,-1.1351373662  
 H,0,-0.0086799959,1.4778669279,-2.0918276029  
 C,0,0.4081947231,3.3407004753,1.2774157771  
 H,0,0.0338054473,1.426429819,2.195643951  
 C,0,0.5310695913,4.045576722,0.0780958627  
 H,0,0.4631743607,3.9143959362,-2.07364645  
 H,0,0.5116764444,3.859333921,2.2271954504  
 H,0,0.7329596943,5.1134077264,0.0896208667

**Intermediate (13) B3LYP/6-31G(d)**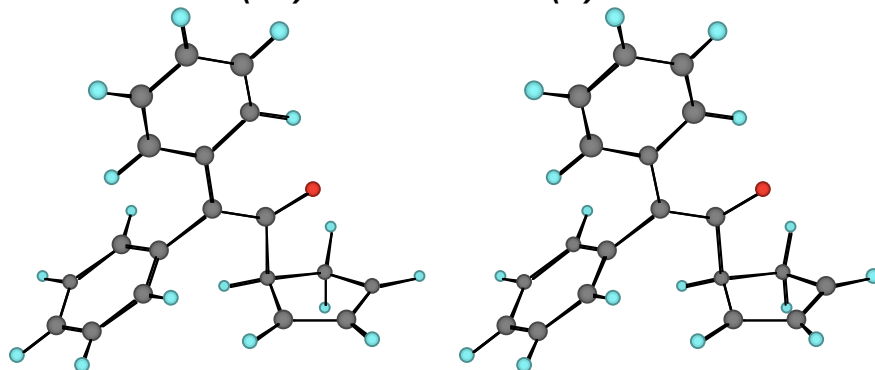

E(RB+HF-LYP) = -808.789092427

|                                              |                             |
|----------------------------------------------|-----------------------------|
| Zero-point correction=                       | 0.292950 (Hartree/Particle) |
| Thermal correction to Energy=                | 0.309117                    |
| Thermal correction to Enthalpy=              | 0.310062                    |
| Thermal correction to Gibbs Free Energy=     | 0.247825                    |
| Sum of electronic and zero-point Energies=   | -808.496142                 |
| Sum of electronic and thermal Energies=      | -808.479975                 |
| Sum of electronic and thermal Enthalpies=    | -808.479031                 |
| Sum of electronic and thermal Free Energies= | -808.541268                 |

|       |   | E (Thermal) |           | CV             | S              |
|-------|---|-------------|-----------|----------------|----------------|
|       |   | KCal/Mol    |           | Cal/Mol-Kelvin | Cal/Mol-Kelvin |
| Total |   | 193.974     |           | 64.931         | 130.989        |
| 1     | 6 | 0           | -2.337371 | -0.396465      | -0.499095      |
| 2     | 6 | 0           | -2.513296 | -0.343401      | 0.950947       |
| 3     | 6 | 0           | -3.037914 | -1.571054      | 1.397524       |
| 4     | 6 | 0           | -3.344475 | -2.346916      | 0.301601       |
| 5     | 6 | 0           | -3.252730 | -1.535761      | -0.955325      |
| 6     | 8 | 0           | -0.836645 | -2.293690      | -0.507083      |
| 7     | 6 | 0           | -0.833646 | -1.053349      | -0.402899      |
| 8     | 6 | 0           | 0.223860  | -0.167662      | -0.116155      |
| 9     | 1 | 0           | -2.360891 | 0.537964       | -1.052680      |
| 10    | 1 | 0           | -2.198238 | 0.483173       | 1.574109       |
| 11    | 1 | 0           | -3.106539 | -1.882787      | 2.433573       |
| 12    | 1 | 0           | -3.686257 | -3.375740      | 0.334381       |
| 13    | 1 | 0           | -4.244152 | -1.128410      | -1.210013      |
| 14    | 1 | 0           | -2.873550 | -2.095842      | -1.810485      |
| 15    | 6 | 0           | 1.619969  | -0.625814      | -0.067809      |
| 16    | 6 | 0           | 1.981320  | -1.994638      | -0.147963      |
| 17    | 6 | 0           | 2.674145  | 0.306544       | 0.098356       |
| 18    | 6 | 0           | 3.308191  | -2.395372      | -0.029985      |
| 19    | 1 | 0           | 1.204373  | -2.729884      | -0.309021      |
| 20    | 6 | 0           | 3.999171  | -0.103144      | 0.207486       |
| 21    | 1 | 0           | 2.449150  | 1.365730       | 0.149505       |
| 22    | 6 | 0           | 4.329201  | -1.458438      | 0.147890       |
| 23    | 1 | 0           | 3.548376  | -3.454223      | -0.091147      |
| 24    | 1 | 0           | 4.778915  | 0.643679       | 0.336319       |
| 25    | 1 | 0           | 5.364892  | -1.778319      | 0.227623       |
| 26    | 6 | 0           | -0.016561 | 1.311692       | -0.078154      |
| 27    | 6 | 0           | -0.014439 | 2.016655       | 1.137648       |
| 28    | 6 | 0           | -0.203668 | 2.045081       | -1.262361      |
| 29    | 6 | 0           | -0.214557 | 3.397805       | 1.171726       |

|    |   |   |           |          |           |
|----|---|---|-----------|----------|-----------|
| 30 | 1 | 0 | 0.155940  | 1.469587 | 2.061652  |
| 31 | 6 | 0 | -0.413699 | 3.424981 | -1.231509 |
| 32 | 1 | 0 | -0.179504 | 1.521585 | -2.214988 |
| 33 | 6 | 0 | -0.421453 | 4.106502 | -0.013291 |
| 34 | 1 | 0 | -0.209667 | 3.919826 | 2.125281  |
| 35 | 1 | 0 | -0.561588 | 3.968460 | -2.161319 |
| 36 | 1 | 0 | -0.580386 | 5.181244 | 0.012085  |

### 2ndTS giving 4+2 (14) B3LYP/6-31G(d)

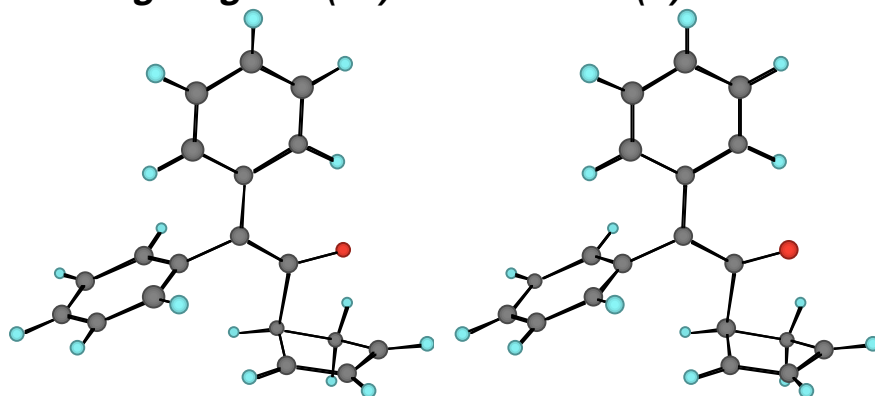

E(RB+HF-LYP) = -808.788846278

|                                              |                             |
|----------------------------------------------|-----------------------------|
| Zero-point correction=                       | 0.292974 (Hartree/Particle) |
| Thermal correction to Energy=                | 0.308330                    |
| Thermal correction to Enthalpy=              | 0.309274                    |
| Thermal correction to Gibbs Free Energy=     | 0.248770                    |
| Sum of electronic and zero-point Energies=   | -808.495873                 |
| Sum of electronic and thermal Energies=      | -808.480517                 |
| Sum of electronic and thermal Enthalpies=    | -808.479572                 |
| Sum of electronic and thermal Free Energies= | -808.540077                 |

|       | E (Thermal) | CV             | S              |
|-------|-------------|----------------|----------------|
|       | KCal/Mol    | Cal/Mol-Kelvin | Cal/Mol-Kelvin |
| Total | 193.480     | 62.706         | 127.342        |

C,0,2.2017798447,0.8509082351,-2.8154630916  
 C,0,1.5069773679,1.1632795146,-1.4845783439  
 C,0,2.5807017524,1.036966393,-0.4900940728  
 C,0,3.5780325729,0.2076546527,-1.0047909369  
 C,0,3.2506859808,-0.0978868026,-2.32105102  
 C,0,0.7672833207,-0.2390893653,-1.1051409212  
 C,0,-0.1640154797,-0.2246802668,-0.0648768564  
 O,0,1.2132447868,-1.201919961,-1.7808769793  
 H,0,0.856600889,2.031894971,-1.4243553627  
 H,0,2.5195789475,1.41894615,0.5213438155  
 H,0,4.3926336912,-0.2291573042,-0.4386748848  
 H,0,3.7757721048,-0.8066482466,-2.9513642831  
 H,0,2.6753353573,1.7649199261,-3.2056296344  
 H,0,1.5480790887,0.4314439397,-3.579702408  
 C,0,-0.5319536311,1.0748014999,0.5881646829  
 C,0,-1.465398944,1.9429586168,-0.0032734845  
 C,0,0.0181472306,1.4446841586,1.8266598472  
 C,0,-1.8137868274,3.1501633716,0.6050659423  
 H,0,-1.9189500853,1.6613350165,-0.9503149604  
 C,0,-0.3346468702,2.6472259662,2.4428708944



```

H,0,0.7206045322,0.7711236341,2.3111798736
C,0,-1.2480763333,3.5070685573,1.8306736379
H,0,-2.5330592416,3.8085933655,0.1244639395
H,0,0.1048179462,2.9115765425,3.4014472415
H,0,-1.5214479071,4.4447069324,2.307345006
C,0,-0.9427977714,-1.417705994,0.3035458979
C,0,-1.8928951947,-1.352461123,1.3513038576
C,0,-0.7718758839,-2.6725016994,-0.3310376157
C,0,-2.6064917206,-2.4756444879,1.7584318805
H,0,-2.0655089809,-0.4099538418,1.8588655773
C,0,-1.4849117903,-3.7921402305,0.0868810434
H,0,-0.0764887066,-2.7509123723,-1.156290294
C,0,-2.4075034002,-3.707441645,1.1322725237
H,0,-3.3247750139,-2.3852275965,2.5698410491
H,0,-1.3260694396,-4.7405735528,-0.4210309155
H,0,-2.9686068152,-4.5836639833,1.4465088857

```

### 2ndTS giving 2+2 (15) B3LYP/6-31G(d)

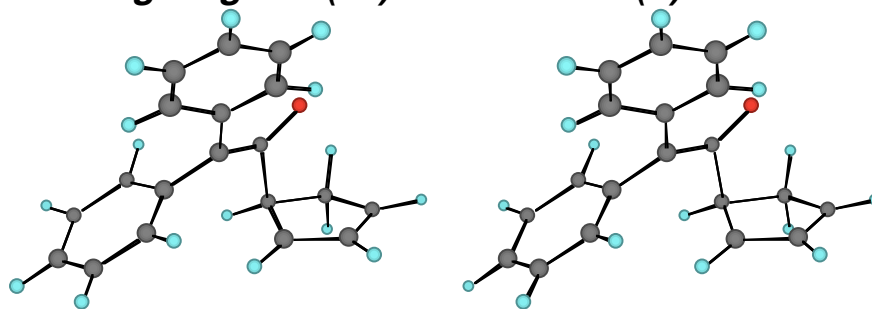

E(RB+HF-LYP) = -808.788042815

```

Zero-point correction=                .293131 (Hartree/Particle)
Thermal correction to Energy=          .308346
Thermal correction to Enthalpy=        .309290
Thermal correction to Gibbs Free Energy= .250133
Sum of electronic and zero-point Energies= -808.494911
Sum of electronic and thermal Energies= -808.479697
Sum of electronic and thermal Enthalpies= -808.478753
Sum of electronic and thermal Free Energies= -808.537909

```

|       | E (Thermal) | CV             | S              |
|-------|-------------|----------------|----------------|
|       | KCal/Mol    | Cal/Mol-Kelvin | Cal/Mol-Kelvin |
| Total | 193.490     | 62.780         | 124.506        |

```

C,0,-0.3350196762,1.1730561307,-0.9592019136
C,0,-0.5204150899,1.2838746783,0.5134773962
C,0,-1.9001299674,1.1128126593,0.8046442056
C,0,-2.6144210578,1.0746866658,-0.3609555565
C,0,-1.7379443181,1.3800789316,-1.5461432627
O,0,-0.9850988547,-1.1415033894,-1.2135577223
C,0,-0.0886432554,-0.3868243738,-0.8194714243
C,0,0.9949179868,-0.7335296151,0.0727532982
H,0,0.4738450596,1.7457678094,-1.4052501837
H,0,0.2510684689,1.5513594848,1.2207181081
H,0,-2.3104469086,0.9930338953,1.801484112
H,0,-3.6837507826,0.9044601086,-0.4342973868
H,0,-1.8769568634,2.424809949,-1.8641882297
H,0,-1.9366541758,0.7284896371,-2.3998682334

```

```

C,0,2.2000862921,0.141496386,0.1300384574
C,0,2.8417279905,0.5626551256,-1.0487390653
C,0,2.7503000077,0.5544734426,1.3592941106
C,0,3.9718615939,1.3802943677,-1.0032772479
H,0,2.456282775,0.2273164879,-2.007920325
C,0,3.879559923,1.3697138969,1.4060583642
H,0,2.2789301806,0.2297117384,2.2834068473
C,0,4.4944845753,1.7902035195,0.2238169309
H,0,4.4497831869,1.6877577808,-1.9299077404
H,0,4.2793595929,1.6794624593,2.3682472358
H,0,5.3755002811,2.4251404207,0.2603445851
C,0,1.0863105536,-2.0744724055,0.6763742237
C,0,2.3214215622,-2.5896199355,1.1322664399
C,0,-0.0633920288,-2.8784405585,0.8738619573
C,0,2.4033636293,-3.8264595423,1.7675761525
H,0,3.2294668517,-2.0179146096,0.9776050835
C,0,0.0232169552,-4.1059041863,1.5193507567
H,0,-1.0154026735,-2.5302495365,0.4963447977
C,0,1.2546852267,-4.5912886691,1.9713438057
H,0,3.3710830527,-4.1944351108,2.0990717285
H,0,-0.8784701864,-4.6958600065,1.6639323117
H,0,1.3172114729,-5.5572558125,2.4656335854

```

### Another TS that gives 2+2 (Similar to 10) B3LYP/6-31G(d)

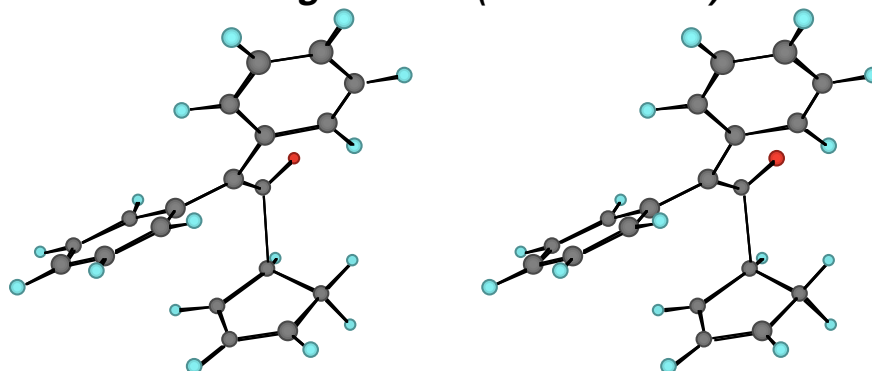

key distances 1.85/2.97

E(RB+HF-LYP) = -808.770273763

```

Zero-point correction=                0.291029 (Hartree/Particle)
Thermal correction to Energy=          0.307222
Thermal correction to Enthalpy=        0.308166
Thermal correction to Gibbs Free Energy= 0.245964
Sum of electronic and zero-point Energies= -808.479244
Sum of electronic and thermal Energies= -808.463052
Sum of electronic and thermal Enthalpies= -808.462108
Sum of electronic and thermal Free Energies= -808.524309

```

|       | E (Thermal)<br>KCal/Mol | CV<br>Cal/Mol-Kelvin | S<br>Cal/Mol-Kelvin |
|-------|-------------------------|----------------------|---------------------|
| Total | 192.785                 | 64.474               | 130.915             |

```

C,0,-2.2611051943,-1.1980776388,-0.9129352907
C,0,-2.7435416722,0.1381727956,-0.9875609879
C,0,-2.9657662988,0.6493783051,0.3260034677
C,0,-2.8054783879,-0.3613214763,1.2298849088
C,0,-2.5669336145,-1.6599934004,0.5195192076

```

```

C,0,-0.4217759181,-1.3790486912,-0.9974749924
O,0,-0.1958032278,-2.4823102651,-1.4400500407
C,0,0.3462709025,-0.3697178817,-0.3881631603
H,0,-2.4958930188,-1.8715139985,-1.7322749303
H,0,-2.9443775354,0.6793388166,-1.9024812599
H,0,-3.2048768779,1.6811276881,0.5570134926
H,0,-2.8873450125,-0.2677621037,2.3075975717
H,0,-3.497794615,-2.2530859146,0.5135719991
H,0,-1.8015770465,-2.2917283264,0.9794425704
C,0,0.054952413,1.0452398937,-0.5789756577
C,0,-0.4204327928,1.5231744825,-1.8208366071
C,0,0.2347910337,2.001904626,0.4523426832
C,0,-0.7112429767,2.8785678783,-2.0224444633
H,0,-0.4930897658,0.8324551845,-2.6555476083
C,0,-0.0522228964,3.3428355106,0.2504034564
H,0,0.5813615108,1.6663348835,1.4246681891
C,0,-0.5316425316,3.792941473,-0.9914661172
H,0,-1.0622276609,3.2123748297,-2.9958533054
H,0,0.0849529787,4.0496525334,1.065070201
H,0,-0.7498136322,4.8463738917,-1.1446821102
C,0,1.4899569684,-0.831347519,0.431678914
C,0,2.6139893007,-0.0006137979,0.6393113629
C,0,1.529393861,-2.1172912247,1.0129674355
C,0,3.702355884,-0.4271779462,1.396477018
H,0,2.6435920521,0.9804296974,0.1774000429
C,0,2.6205487221,-2.5410887788,1.766236196
H,0,0.69951652,-2.7998189005,0.8629781443
C,0,3.7151106357,-1.6988862463,1.9716390445
H,0,4.5530077832,0.2381017104,1.5244004942
H,0,2.611963336,-3.5385783373,2.198942606
H,0,4.5656621802,-2.0311217149,2.5605157208

```

### Dichloro 1st TS (18) B3LYP/6-31G\*

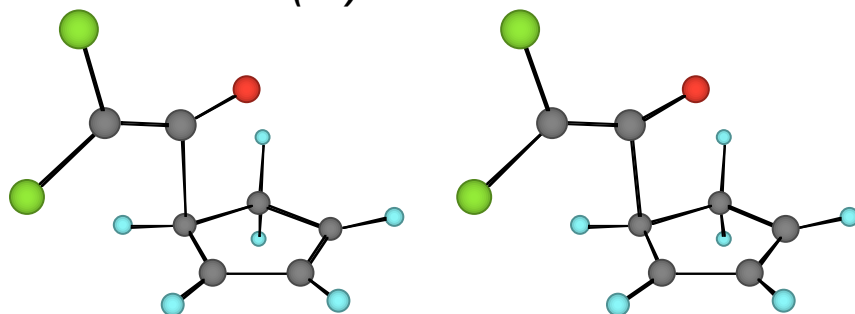

key distances OC 2.896 CC 2.071 CC 3.089  
E(RB+HF-LYP) = -1265.85488175

```

Zero-point correction= 0.110242 (Hartree/Particle)
Thermal correction to Energy= 0.119697
Thermal correction to Enthalpy= 0.120642
Thermal correction to Gibbs Free Energy= 0.074432
Sum of electronic and zero-point Energies= -1265.744640
Sum of electronic and thermal Energies= -1265.735184
Sum of electronic and thermal Enthalpies= -1265.734240
Sum of electronic and thermal Free Energies= -1265.780450

```

| E (Thermal) | CV             | S              |
|-------------|----------------|----------------|
| KCal/Mol    | Cal/Mol-Kelvin | Cal/Mol-Kelvin |

Total 75.111 33.989 97.257

C,0,-1.3017655448,0.7261971462,-0.6826644612  
 C,0,-1.5233911672,1.0153873164,0.660434567  
 C,0,-2.5867177014,0.1879991549,1.1656232514  
 C,0,-3.0806773959,-0.5622894533,0.1450236547  
 C,0,-2.4119054264,-0.1876900095,-1.1438866919  
 O,0,-0.4386831821,-1.7378406175,-0.0030948267  
 C,0,0.1053768458,-0.6678536878,-0.0762748984  
 C,0,1.3062949865,-0.0514271972,0.0322346989  
 Cl,0,1.6325486025,1.6575947269,-0.0933452215  
 Cl,0,2.7250901996,-1.0752341411,0.1294269305  
 H,0,-0.7294227578,1.3504724597,-1.356703325  
 H,0,-0.9580600428,1.7321942271,1.2442060158  
 H,0,-2.8951094471,0.1451114486,2.2035661653  
 H,0,-3.8548369901,-1.3172274521,0.2232838892  
 H,0,-3.101704316,0.3837051683,-1.7855937119  
 H,0,-2.0745482053,-1.0536004899,-1.720330195

### Dichloro intermediate (19) B3LYP/6-31G\*

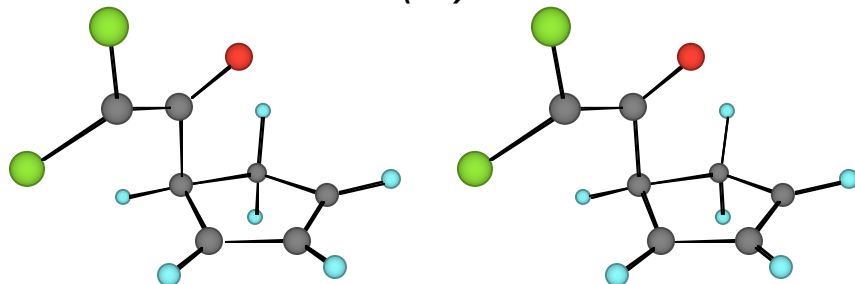

key distances OC 2.770 CC 2.758  
 E(RB+HF-LYP) = -1265.86141805

|                                              |                             |
|----------------------------------------------|-----------------------------|
| Zero-point correction=                       | 0.111972 (Hartree/Particle) |
| Thermal correction to Energy=                | 0.121258                    |
| Thermal correction to Enthalpy=              | 0.122202                    |
| Thermal correction to Gibbs Free Energy=     | 0.076165                    |
| Sum of electronic and zero-point Energies=   | -1265.749446                |
| Sum of electronic and thermal Energies=      | -1265.740160                |
| Sum of electronic and thermal Enthalpies=    | -1265.739216                |
| Sum of electronic and thermal Free Energies= | -1265.785253                |

|       | E (Thermal)<br>KCal/Mol | CV<br>Cal/Mol-Kelvin | S<br>Cal/Mol-Kelvin |
|-------|-------------------------|----------------------|---------------------|
| Total | 76.091                  | 33.993               | 96.892              |

C,0,-1.1247714577,0.5872376083,-0.8006859915  
 C,0,-1.3736737551,0.9767116205,0.5973564138  
 C,0,-2.3884543425,0.1536697189,1.1288145978  
 C,0,-2.905848807,-0.6263317667,0.1222957887  
 C,0,-2.3761018478,-0.1954992082,-1.2128553651  
 O,0,-0.3927964466,-1.6910418857,-0.3489987972  
 C,0,-0.0326715325,-0.5106276572,-0.3834314587  
 C,0,1.1699535595,0.0186903354,0.1292973823  
 Cl,0,1.7127888693,1.6526116149,-0.2044470281  
 Cl,0,2.432284588,-1.0712982456,0.6055217442  
 H,0,-0.7433572812,1.3433456965,-1.4846600283  
 H,0,-0.8182298998,1.7352554275,1.1328166397

H,0,-2.6613779377,0.1001662712,2.1763916905  
 H,0,-3.648523941,-1.4062373296,0.2520401082  
 H,0,-3.0950652821,0.4795513605,-1.7024956089  
 H,0,-2.1679137623,-1.0291775262,-1.8851208014

### 2<sup>nd</sup> TS Dichloro 2+2 side (20) B3LYP/6-31G\*

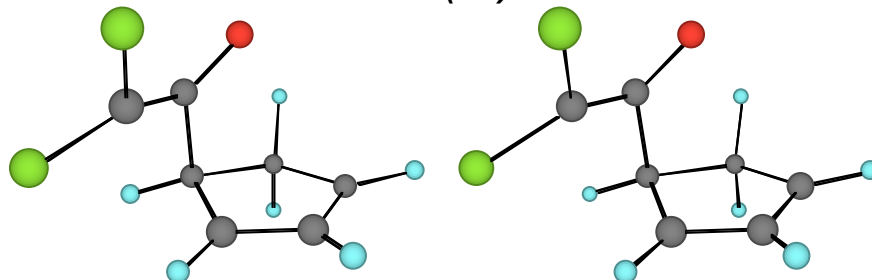

key distances OC 2.907 CC 2.551  
 E(RB+HF-LYP) = -1265.86123253

|                                              |                             |
|----------------------------------------------|-----------------------------|
| Zero-point correction=                       | 0.112008 (Hartree/Particle) |
| Thermal correction to Energy=                | 0.120384                    |
| Thermal correction to Enthalpy=              | 0.121328                    |
| Thermal correction to Gibbs Free Energy=     | 0.077923                    |
| Sum of electronic and zero-point Energies=   | -1265.749224                |
| Sum of electronic and thermal Energies=      | -1265.740848                |
| Sum of electronic and thermal Enthalpies=    | -1265.739904                |
| Sum of electronic and thermal Free Energies= | -1265.783310                |

|       | E (Thermal)<br>KCal/Mol | CV<br>Cal/Mol-Kelvin | S<br>Cal/Mol-Kelvin |
|-------|-------------------------|----------------------|---------------------|
| Total | 75.542                  | 31.928               | 91.355              |

C,0,-1.143996788,0.5909189578,-0.8174079084  
 C,0,-1.2325300209,0.9046410216,0.6312692265  
 C,0,-2.2274148851,0.0751433892,1.2119011567  
 C,0,-2.8827266456,-0.6094323242,0.2256575983  
 C,0,-2.448261628,-0.1505694703,-1.1381748609  
 O,0,-0.3186520905,-1.6948039006,-0.610069108  
 C,0,-0.0320420389,-0.5026358472,-0.5507225202  
 C,0,1.1124231652,0.0397786604,0.1180493148  
 Cl,0,1.7147295956,1.6537116707,-0.2351430471  
 Cl,0,2.3295032462,-1.0533387554,0.6992349186  
 H,0,-0.8379463312,1.3888256071,-1.4923449917  
 H,0,-0.6779702012,1.683098775,1.1359640603  
 H,0,-2.4040012098,-0.0234939588,2.2768863146  
 H,0,-3.6572796865,-1.3517275097,0.3881465707  
 H,0,-3.1906058032,0.5432125412,-1.5605578988  
 H,0,-2.3076453079,-0.9748901324,-1.8405350482

**2<sup>nd</sup> TS Dichloro 4+2 side (21) B3LYP/6-31G\***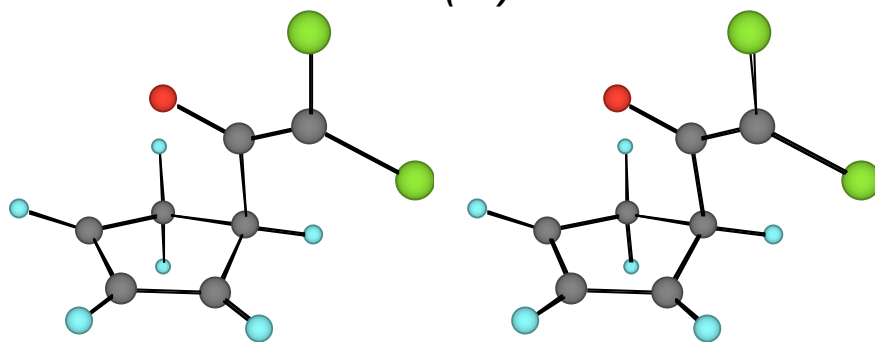

key distances OC 2.391 CC 2.947  
 E(RB+HF-LYP) = -1265.86084477

|                                              |                             |
|----------------------------------------------|-----------------------------|
| Zero-point correction=                       | 0.112119 (Hartree/Particle) |
| Thermal correction to Energy=                | 0.120546                    |
| Thermal correction to Enthalpy=              | 0.121491                    |
| Thermal correction to Gibbs Free Energy=     | 0.077599                    |
| Sum of electronic and zero-point Energies=   | -1265.748726                |
| Sum of electronic and thermal Energies=      | -1265.740298                |
| Sum of electronic and thermal Enthalpies=    | -1265.739354                |
| Sum of electronic and thermal Free Energies= | -1265.783246                |

|       | E (Thermal)<br>KCal/Mol | CV<br>Cal/Mol-Kelvin | S<br>Cal/Mol-Kelvin |
|-------|-------------------------|----------------------|---------------------|
| Total | 75.644                  | 31.759               | 92.378              |

C,0,2.376878288,0.1157490426,-1.1203291  
 C,0,1.1375487737,0.8245155709,-0.5587893054  
 C,0,1.4368927711,0.9731128765,0.8792666452  
 C,0,2.3729767425,0.0074886531,1.2441359431  
 C,0,2.7703964035,-0.6691878951,0.0938379201  
 C,0,0.0932575563,-0.3763536068,-0.3599386328  
 C,0,-1.1942886738,-0.0424594255,0.0257674905  
 O,0,0.5983085543,-1.5217287886,-0.4264927655  
 Cl,0,-2.3984211899,-1.2795929418,0.2068663067  
 Cl,0,-1.8229681181,1.5918873464,-0.0444724241  
 H,0,0.738082185,1.6845768419,-1.0918559154  
 H,0,0.8957712899,1.6315269331,1.5481549255  
 H,0,2.6390990251,-0.2625163983,2.2593036098  
 H,0,3.4049064322,-1.5477908551,0.0700752804  
 H,0,3.1531990543,0.8586374873,-1.3576107326  
 H,0,2.1841206479,-0.4967998729,-2.0005268123

**Dichloro 2+2 TS (Similar to 10) B3LYP/6-31G\***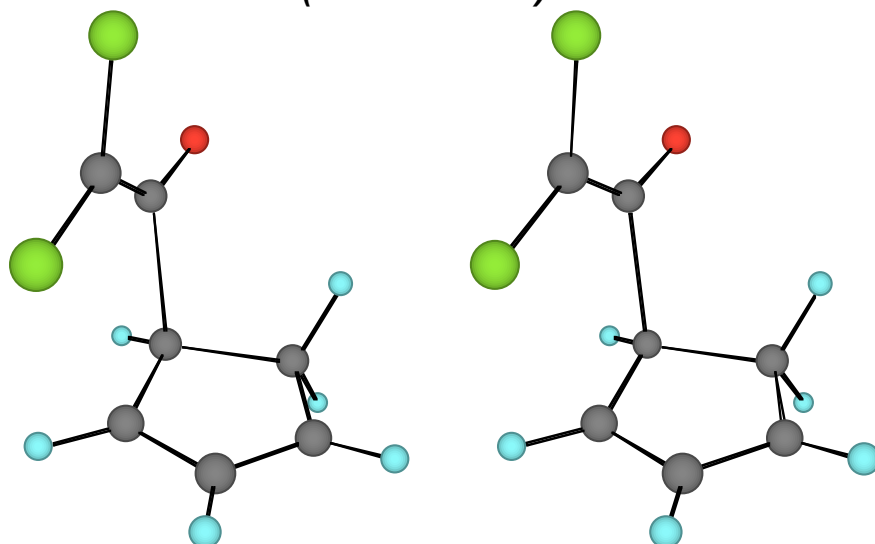

key distances: 1.846 3.112  
 E(RB+HF-LYP) = -1265.83562795

|                                              |                             |
|----------------------------------------------|-----------------------------|
| Zero-point correction=                       | 0.109929 (Hartree/Particle) |
| Thermal correction to Energy=                | 0.119447                    |
| Thermal correction to Enthalpy=              | 0.120391                    |
| Thermal correction to Gibbs Free Energy=     | 0.073365                    |
| Sum of electronic and zero-point Energies=   | -1265.725699                |
| Sum of electronic and thermal Energies=      | -1265.716181                |
| Sum of electronic and thermal Enthalpies=    | -1265.715237                |
| Sum of electronic and thermal Free Energies= | -1265.762263                |

|       | E (Thermal) | CV             | S              |
|-------|-------------|----------------|----------------|
|       | KCal/Mol    | Cal/Mol-Kelvin | Cal/Mol-Kelvin |
| Total | 74.954      | 33.729         | 98.975         |

```

C,0,0.7063077878,0.1649202152,-1.5412068003
C,0,-0.5865373012,0.6412358169,-1.8685519297
C,0,-1.4421738109,-0.4340350669,-2.2602980129
C,0,-0.6967248516,-1.5738274201,-2.3389311284
C,0,0.7346435176,-1.2916316541,-2.0169058841
C,0,1.1053268143,0.0353651966,0.2569756859
O,0,2.2244364642,-0.4332614689,0.357426497
C,0,0.1426620167,0.4155469591,1.1486423152
Cl,0,-1.3875654735,1.1783769794,0.809808881
Cl,0,0.3761188106,-0.0321729989,2.8258360787
H,0,1.5480798397,0.8136520615,-1.7742452104
H,0,-0.8756806245,1.6848333657,-1.872647181
H,0,-2.5024195785,-0.3424987689,-2.4651082808
H,0,-1.0724113525,-2.5580582169,-2.599602
H,0,1.3442483083,-1.3722140513,-2.9320422698
H,0,1.1762594208,-1.990533493,-1.3000519133
  
```

**cyclopentadiene (1) B3LYP/6-311+G(d,p)**

E(RB+HF-LYP) = -194.156236414

|                        |                             |
|------------------------|-----------------------------|
| Zero-point correction= | 0.092110 (Hartree/Particle) |
|------------------------|-----------------------------|

|                                              |             |
|----------------------------------------------|-------------|
| Thermal correction to Energy=                | 0.096268    |
| Thermal correction to Enthalpy=              | 0.097212    |
| Thermal correction to Gibbs Free Energy=     | 0.065511    |
| Sum of electronic and zero-point Energies=   | -194.064126 |
| Sum of electronic and thermal Energies=      | -194.059968 |
| Sum of electronic and thermal Enthalpies=    | -194.059024 |
| Sum of electronic and thermal Free Energies= | -194.090725 |

|       | E (Thermal)<br>KCal/Mol | CV<br>Cal/Mol-Kelvin | S<br>Cal/Mol-Kelvin |
|-------|-------------------------|----------------------|---------------------|
| Total | 60.409                  | 15.649               | 66.721              |

C,0,0.2858330672,-0.1518990532,-1.1722038957  
 C,0,-0.6449040011,0.8600922539,-0.5609186524  
 C,0,-0.6753512112,0.6809537452,0.7743970734  
 C,0,0.2098695453,-0.4335675707,1.134609047  
 C,0,0.7772008926,-0.9305400967,0.0178428559  
 H,0,-1.1900637841,1.6019616733,-1.1283589879  
 H,0,-1.2548986835,1.2580750368,1.4836761406  
 H,0,0.3705508445,-0.7875764804,2.1449921489  
 H,0,1.4757725637,-1.753829279,-0.0433881411  
 H,0,1.1102823315,0.3257711605,-1.7189127499  
 H,0,-0.2275330284,-0.7946377818,-1.9003669801

### **diphenylketene (2) B3LYP/6-311+G(d,p)**

E(RB+HF-LYP) = -614.869297097

|                                              |                             |
|----------------------------------------------|-----------------------------|
| Zero-point correction=                       | 0.195181 (Hartree/Particle) |
| Thermal correction to Energy=                | 0.207140                    |
| Thermal correction to Enthalpy=              | 0.208084                    |
| Thermal correction to Gibbs Free Energy=     | 0.155126                    |
| Sum of electronic and zero-point Energies=   | -614.674116                 |
| Sum of electronic and thermal Energies=      | -614.662158                 |
| Sum of electronic and thermal Enthalpies=    | -614.661213                 |
| Sum of electronic and thermal Free Energies= | -614.714171                 |

|       | E (Thermal)<br>KCal/Mol | CV<br>Cal/Mol-Kelvin | S<br>Cal/Mol-Kelvin |
|-------|-------------------------|----------------------|---------------------|
| Total | 129.982                 | 46.514               | 111.459             |

C,0,2.0232594223,0.7820146923,0.0404007989  
 O,0,3.1076256085,1.2011303494,0.062070106  
 C,0,0.7885298295,0.3047650359,0.0157586998  
 C,0,0.1265664487,0.0029408839,1.3148621186  
 C,0,-1.2397537188,0.272673369,1.4875184773  
 C,0,0.8450499446,-0.5306154548,2.3950684835  
 C,0,-1.8637399863,0.0154417973,2.7044243986  
 H,0,-1.8099823679,0.6899190695,0.6660849676  
 C,0,0.2210242368,-0.769543883,3.6170433093  
 H,0,1.8958685057,-0.771937382,2.2739436648  
 C,0,-1.1369335168,-0.5017063998,3.7769222028  
 H,0,-2.9207431277,0.2295753059,2.8180282995  
 H,0,0.7955278441,-1.1801066783,4.4399085015  
 H,0,-1.625081203,-0.6970116052,4.7247581518  
 C,0,0.1412697647,0.1005558784,-1.309503851  
 C,0,-0.6813979947,-1.0155690225,-1.5260302448  
 C,0,0.3510942009,0.9932232884,-2.3710378269



C,0,-1.2734697524,-1.2283064481,-2.7672286979  
 H,0,-0.850850032,-1.7189640593,-0.7194755238  
 C,0,-0.2285415109,0.7669822363,-3.6170591417  
 H,0,0.9614848617,1.8767980447,-2.2166225326  
 C,0,-1.0467653112,-0.3422587841,-3.8205309935  
 H,0,-1.9069141534,-2.0960672929,-2.9147208366  
 H,0,-0.0513618727,1.4683077573,-4.4248171285  
 H,0,-1.5061056612,-0.5131390908,-4.7872948086

### 4+2\_product (3) B3LYP/6-311+G(d,p)

E(RB+HF-LYP) = -809.023654094

|                                              |                             |
|----------------------------------------------|-----------------------------|
| Zero-point correction=                       | 0.294164 (Hartree/Particle) |
| Thermal correction to Energy=                | 0.309421                    |
| Thermal correction to Enthalpy=              | 0.310365                    |
| Thermal correction to Gibbs Free Energy=     | 0.249904                    |
| Sum of electronic and zero-point Energies=   | -808.729490                 |
| Sum of electronic and thermal Energies=      | -808.714233                 |
| Sum of electronic and thermal Enthalpies=    | -808.713289                 |
| Sum of electronic and thermal Free Energies= | -808.773750                 |

|       | E (Thermal) | CV             | S              |
|-------|-------------|----------------|----------------|
|       | KCal/Mol    | Cal/Mol-Kelvin | Cal/Mol-Kelvin |
| Total | 194.164     | 62.695         | 127.250        |
| C     | 2.23655     | 1.03251        | 0.26239        |
| C     | 2.95463     | 1.05467        | -1.08929       |
| C     | 3.68179     | -0.06525       | -1.17481       |
| C     | 3.42124     | -0.82501       | 0.11411        |
| C     | 3.31192     | 0.31607        | 1.13098        |
| O     | 2.00522     | -1.27067       | 0.05669        |
| C     | 1.24544     | -0.12787       | 0.13541        |
| C     | -0.10294    | -0.10845       | 0.0751         |
| H     | 1.82099     | 1.96979        | 0.6141         |
| H     | 2.78678     | 1.80026        | -1.85504       |
| H     | 4.23993     | -0.43946       | -2.02206       |
| H     | 4.02147     | -1.70079       | 0.34064        |
| H     | 4.22721     | 0.89763        | 1.23371        |
| H     | 2.9468      | -0.01529       | 2.10518        |
| C     | -0.80539    | 1.20481        | 0.23985        |
| C     | -0.77493    | 1.90467        | 1.45309        |
| C     | -1.53379    | 1.75644        | -0.82415       |
| C     | -1.42974    | 3.12844        | 1.59395        |
| H     | -0.24157    | 1.47752        | 2.29558        |
| C     | -2.18851    | 2.97766        | -0.68682       |
| H     | -1.58154    | 1.22015        | -1.76554       |
| C     | -2.13679    | 3.6706         | 0.52313        |
| H     | -1.39383    | 3.65232        | 2.54304        |
| H     | -2.73907    | 3.39017        | -1.52534       |
| H     | -2.6483     | 4.62054        | 0.63078        |
| C     | -0.94631    | -1.3144        | -0.13145       |
| C     | -2.2601     | -1.34172       | 0.37079        |
| C     | -0.49497    | -2.44639       | -0.83496       |
| C     | -3.0814     | -2.45105       | 0.19065        |
| H     | -2.64132    | -0.48357       | 0.91093        |
| C     | -1.32131    | -3.5503        | -1.02164       |
| H     | 0.50838     | -2.45879       | -1.23576       |

|   |          |          |          |
|---|----------|----------|----------|
| C | -2.61782 | -3.56345 | -0.50853 |
| H | -4.08709 | -2.44364 | 0.59702  |
| H | -0.94856 | -4.40648 | -1.57385 |
| H | -3.25737 | -4.42693 | -0.65371 |

## 2+2\_product (4) B3LYP/6-311+G(d,p)

E(RB+HF-LYP) = -809.037029631

|                                              |                             |
|----------------------------------------------|-----------------------------|
| Zero-point correction=                       | 0.292871 (Hartree/Particle) |
| Thermal correction to Energy=                | 0.308668                    |
| Thermal correction to Enthalpy=              | 0.309612                    |
| Thermal correction to Gibbs Free Energy=     | 0.248251                    |
| Sum of electronic and zero-point Energies=   | -808.744159                 |
| Sum of electronic and thermal Energies=      | -808.728361                 |
| Sum of electronic and thermal Enthalpies=    | -808.727417                 |
| Sum of electronic and thermal Free Energies= | -808.788779                 |

|       | E (Thermal)<br>KCal/Mol | CV<br>Cal/Mol-Kelvin | S<br>Cal/Mol-Kelvin |
|-------|-------------------------|----------------------|---------------------|
| Total | 193.692                 | 63.722               | 129.146             |
| C     | -2.21613                | -1.28291             | -0.30831            |
| C     | -1.54679                | -0.05598             | -1.01212            |
| C     | -2.50281                | 1.06134              | -0.6757             |
| C     | -3.60888                | 0.62936              | -0.06586            |
| C     | -3.63161                | -0.86909             | 0.13965             |
| C     | -1.12101                | -1.18515             | 0.75382             |
| O     | -1.01019                | -1.65344             | 1.85364             |
| C     | -0.26194                | -0.19493             | -0.08468            |
| H     | -2.1691                 | -2.23068             | -0.84799            |
| H     | -1.35101                | -0.13519             | -2.08135            |
| H     | -2.30011                | 2.09737              | -0.91764            |
| H     | -4.42676                | 1.26871              | 0.24734             |
| H     | -4.41                   | -1.34505             | -0.46768            |
| H     | -3.82587                | -1.15164             | 1.17946             |
| C     | 0.25548                 | 1.06709              | 0.59591             |
| C     | 0.64997                 | 2.15885              | -0.18847            |
| C     | 0.3666                  | 1.16706              | 1.98554             |
| C     | 1.13361                 | 3.3237               | 0.39923             |
| H     | 0.58401                 | 2.09736              | -1.26961            |
| C     | 0.85525                 | 2.33444              | 2.57459             |
| H     | 0.07345                 | 0.33306              | 2.60991             |
| C     | 1.23848                 | 3.41614              | 1.78728             |
| H     | 1.43187                 | 4.15808              | -0.22618            |
| H     | 0.93367                 | 2.39394              | 3.65465             |
| H     | 1.61743                 | 4.32178              | 2.24736             |
| C     | 0.89933                 | -0.95892             | -0.7397             |
| C     | 1.22001                 | -0.80341             | -2.09239            |
| C     | 1.70541                 | -1.79539             | 0.04371             |
| C     | 2.31522                 | -1.46422             | -2.64785            |
| H     | 0.62312                 | -0.15884             | -2.7263             |
| C     | 2.79622                 | -2.45928             | -0.51163            |
| H     | 1.47601                 | -1.92857             | 1.09446             |
| C     | 3.10669                 | -2.29665             | -1.86071            |
| H     | 2.54687                 | -1.32657             | -3.69833            |
| H     | 3.40382                 | -3.10506             | 0.11256             |
| H     | 3.95565                 | -2.81349             | -2.29359            |

**Dichloroketene (5) B3LYP/6-311+G\*\***

E(RB+HF-LYP) = -1071.86577745

|                                              |                             |
|----------------------------------------------|-----------------------------|
| Zero-point correction=                       | 0.015348 (Hartree/Particle) |
| Thermal correction to Energy=                | 0.020444                    |
| Thermal correction to Enthalpy=              | 0.021388                    |
| Thermal correction to Gibbs Free Energy=     | -0.014461                   |
| Sum of electronic and zero-point Energies=   | -1071.850429                |
| Sum of electronic and thermal Energies=      | -1071.845334                |
| Sum of electronic and thermal Enthalpies=    | -1071.844390                |
| Sum of electronic and thermal Free Energies= | -1071.880238                |

|       | E (Thermal)<br>KCal/Mol | CV<br>Cal/Mol-Kelvin | S<br>Cal/Mol-Kelvin |
|-------|-------------------------|----------------------|---------------------|
| Total | 12.829                  | 15.502               | 75.450              |

C,0,1.2191733704,-0.530495457,-0.238176233  
 C,0,0.031956844,-0.0138994385,-0.0062107089  
 O,0,2.2673583232,-0.9865951669,-0.4429765691  
 Cl,0,-1.3039310837,-1.0487457937,0.4007556398  
 Cl,0,-0.2046364383,1.7051652472,-0.1060418631

**Dichloro 2+2 product (7) B3LYP/6-311+G\*\***

E(RB+HF-LYP) = -1266.06746033

|                                              |                             |
|----------------------------------------------|-----------------------------|
| Zero-point correction=                       | 0.112865 (Hartree/Particle) |
| Thermal correction to Energy=                | 0.121691                    |
| Thermal correction to Enthalpy=              | 0.122635                    |
| Thermal correction to Gibbs Free Energy=     | 0.078024                    |
| Sum of electronic and zero-point Energies=   | -1265.954595                |
| Sum of electronic and thermal Energies=      | -1265.945770                |
| Sum of electronic and thermal Enthalpies=    | -1265.944825                |
| Sum of electronic and thermal Free Energies= | -1265.989436                |

|       | E (Thermal)<br>KCal/Mol | CV<br>Cal/Mol-Kelvin | S<br>Cal/Mol-Kelvin |
|-------|-------------------------|----------------------|---------------------|
| Total | 76.362                  | 32.800               | 93.891              |

C,0,-0.654010508,-0.9183470763,-1.1389179576  
 C,0,-0.4081856958,0.616923146,-0.9113618511  
 C,0,-1.7473081631,1.0871424147,-0.4034490162  
 C,0,-2.682627932,0.1381025027,-0.4732043773  
 C,0,-2.1719772128,-1.1696949513,-1.0317142759  
 C,0,0.1479864839,-1.1899503091,0.1447482882  
 O,0,0.2652948709,-2.1140265094,0.8847554164  
 C,0,0.6583251301,0.2840768161,0.1817680739  
 Cl,0,2.336047775,0.3295180234,-0.5025790955  
 Cl,0,0.5960165448,1.1415291899,1.7422049369  
 H,0,-0.1781897632,-1.3588374795,-2.0156307243  
 H,0,-0.0083704222,1.214549007,-1.7304396378  
 H,0,-1.9056226006,2.0951205185,-0.0421414624  
 H,0,-3.716541346,0.2745880578,-0.1774510419  
 H,0,-2.6160536375,-1.3875482565,-2.0091464735  
 H,0,-2.3958872487,-2.0229776549,-0.3840865979

**Dichloro 4+2 product (8) B3LYP/6-311+G\*\***

E(RB+HF-LYP) = -1266.04136382

|                                              |                             |
|----------------------------------------------|-----------------------------|
| Zero-point correction=                       | 0.114392 (Hartree/Particle) |
| Thermal correction to Energy=                | 0.122663                    |
| Thermal correction to Enthalpy=              | 0.123607                    |
| Thermal correction to Gibbs Free Energy=     | 0.080066                    |
| Sum of electronic and zero-point Energies=   | -1265.926972                |
| Sum of electronic and thermal Energies=      | -1265.918701                |
| Sum of electronic and thermal Enthalpies=    | -1265.917757                |
| Sum of electronic and thermal Free Energies= | -1265.961298                |

|       | E (Thermal)<br>KCal/Mol | CV<br>Cal/Mol-Kelvin | S<br>Cal/Mol-Kelvin |
|-------|-------------------------|----------------------|---------------------|
| Total | 76.972                  | 31.694               | 91.640              |

C,0,1.3462101815,0.6080830145,0.5030762892  
 C,0,2.0699803074,0.8466159262,-0.8239276442  
 C,0,2.4535461752,-0.3483559259,-1.288221698  
 C,0,1.9705934025,-1.3666487684,-0.2718293808  
 C,0,2.1582263688,-0.6068237831,1.0454950749  
 O,0,0.481433556,-1.3785397439,-0.3635342177  
 C,0,0.0884093427,-0.1558889324,0.0977661218  
 C,0,-1.1892298028,0.228084495,0.1398366866  
 Cl,0,-1.6664443495,1.7961985444,0.7460567954  
 Cl,0,-2.4890548082,-0.7981670963,-0.3865759155  
 H,0,1.1864364511,1.4635073623,1.1506146616  
 H,0,2.132857145,1.8058660953,-1.3196206984  
 H,0,2.8999970022,-0.5819722448,-2.2446634483  
 H,0,2.2979112459,-2.3973650341,-0.3595378922  
 H,0,3.1953298196,-0.3526532638,1.2597037636  
 H,0,1.6930697183,-1.1059957365,1.8974296998

**1st\_TS (12) B3LYP/6-311+G(d,p)**

E(RB+HF-LYP) = -808.996933374

|                                              |                             |
|----------------------------------------------|-----------------------------|
| Zero-point correction=                       | 0.289501 (Hartree/Particle) |
| Thermal correction to Energy=                | 0.305599                    |
| Thermal correction to Enthalpy=              | 0.306543                    |
| Thermal correction to Gibbs Free Energy=     | 0.244695                    |
| Sum of electronic and zero-point Energies=   | -808.707432                 |
| Sum of electronic and thermal Energies=      | -808.691334                 |
| Sum of electronic and thermal Enthalpies=    | -808.690390                 |
| Sum of electronic and thermal Free Energies= | -808.752238                 |

|       | E (Thermal)<br>KCal/Mol | CV<br>Cal/Mol-Kelvin | S<br>Cal/Mol-Kelvin |
|-------|-------------------------|----------------------|---------------------|
| Total | 191.766                 | 64.483               | 130.171             |

|   |         |          |          |
|---|---------|----------|----------|
| C | 2.39279 | -0.46087 | 0.32305  |
| C | 2.62612 | -0.2816  | -1.06207 |
| C | 3.23157 | -1.4504  | -1.60191 |
| C | 3.5091  | -2.313   | -0.58201 |
| C | 3.21519 | -1.67074 | 0.73564  |
| O | 0.76676 | -2.36958 | -0.02763 |
| C | 0.70917 | -1.15685 | 0.05113  |

|   |          |          |          |
|---|----------|----------|----------|
| C | -0.28168 | -0.19277 | 0.04085  |
| H | 2.2768   | 0.38599  | 0.9854   |
| H | 2.3341   | 0.5926   | -1.62559 |
| H | 3.3896   | -1.63855 | -2.65488 |
| H | 3.91443  | -3.3106  | -0.68945 |
| H | 4.15157  | -1.3146  | 1.19011  |
| H | 2.7284   | -2.33612 | 1.44746  |
| C | -1.69353 | -0.60299 | 0.16963  |
| C | -2.09828 | -1.95489 | 0.25414  |
| C | -2.71497 | 0.37382  | 0.1934   |
| C | -3.44276 | -2.29855 | 0.33861  |
| H | -1.35013 | -2.7345  | 0.25425  |
| C | -4.05705 | 0.02083  | 0.28014  |
| H | -2.45459 | 1.42237  | 0.13333  |
| C | -4.43502 | -1.31866 | 0.35271  |
| H | -3.71629 | -3.34668 | 0.40007  |
| H | -4.81139 | 0.80051  | 0.2908   |
| H | -5.48133 | -1.59372 | 0.42324  |
| C | 0.01944  | 1.27321  | 0.05623  |
| C | 0.10809  | 2.00656  | -1.13472 |
| C | 0.15738  | 1.96732  | 1.26771  |
| C | 0.3577   | 3.37891  | -1.11986 |
| H | -0.0364  | 1.49242  | -2.07898 |
| C | 0.41319  | 3.33727  | 1.28778  |
| H | 0.05739  | 1.42225  | 2.2005   |
| C | 0.51792  | 4.04751  | 0.09233  |
| H | 0.42168  | 3.92531  | -2.05465 |
| H | 0.52315  | 3.85127  | 2.23653  |
| H | 0.71266  | 5.11406  | 0.10622  |

### intermediate (13) B3LYP/6-311+G(d,p)

E(RB+HF-LYP) = -808.997346724

|                                              |                             |
|----------------------------------------------|-----------------------------|
| Zero-point correction=                       | 0.290461 (Hartree/Particle) |
| Thermal correction to Energy=                | 0.306829                    |
| Thermal correction to Enthalpy=              | 0.307773                    |
| Thermal correction to Gibbs Free Energy=     | 0.245137                    |
| Sum of electronic and zero-point Energies=   | -808.706886                 |
| Sum of electronic and thermal Energies=      | -808.690518                 |
| Sum of electronic and thermal Enthalpies=    | -808.689574                 |
| Sum of electronic and thermal Free Energies= | -808.752209                 |

|       | E (Thermal) | CV             | S              |
|-------|-------------|----------------|----------------|
|       | KCal/Mol    | Cal/Mol-Kelvin | Cal/Mol-Kelvin |
| Total | 192.538     | 65.603         | 131.828        |

C,0,2.348609125,-0.4702339976,0.3122869279  
 C,0,2.5182559069,-0.3362326343,-1.1202327449  
 C,0,3.0541659594,-1.5312816086,-1.6420224845  
 C,0,3.3794625109,-2.3627445362,-0.600391327  
 C,0,3.2469921814,-1.6433646405,0.703427476  
 O,0,0.7927762407,-2.3469135278,0.1987503705  
 C,0,0.7989783752,-1.1121614429,0.1961799519  
 C,0,-0.2402229718,-0.1799552493,0.0835722166  
 H,0,2.3592771104,0.4246722979,0.9228563234  
 H,0,2.2005174545,0.5211121033,-1.6948268823  
 H,0,3.1277110468,-1.7757924609,-2.6928114143

```

H,0,3.739215765,-3.3790923334,-0.696018443
H,0,4.2289836614,-1.2546319183,1.0099815093
H,0,2.8548148451,-2.2632040485,1.5074747457
C,0,-1.6462408214,-0.5983209656,0.160863647
C,0,-2.0427443859,-1.953466689,0.2687379818
C,0,-2.6795333744,0.3676142323,0.1007445999
C,0,-3.3862104288,-2.3092180248,0.2802880808
H,0,-1.2838379201,-2.7177218108,0.3463650289
C,0,-4.0197293127,0.0021673095,0.1184554739
H,0,-2.4273088583,1.4172822046,0.0290825177
C,0,-4.3866825609,-1.3403271923,0.204940749
H,0,-3.6537129223,-3.357618261,0.3600115841
H,0,-4.7819765168,0.7722657757,0.0657084546
H,0,-5.4326612981,-1.6252905738,0.2228075048
C,0,0.0373184871,1.2928373323,0.093453927
C,0,0.0579436347,2.03689338,-1.0943183812
C,0,0.2259040052,1.979371184,1.302205196
C,0,0.2867512816,3.4124876065,-1.0795660348
H,0,-0.1227471414,1.5286633218,-2.0356208035
C,0,0.4635269814,3.3528260691,1.3212205204
H,0,0.1797644233,1.4264112758,2.2345458134
C,0,0.4972579883,4.0743897911,0.1288395671
H,0,0.2974289008,3.966645529,-2.011907125
H,0,0.6126546623,3.8603700017,2.2681106792
H,0,0.6768513748,5.1435575768,0.1421254848

```

## 2ndTS giving 4+2 (14) B3LYP/6-311+G(d,p)

E(RB+HF-LYP) = -808.996569616

|                                              |                             |
|----------------------------------------------|-----------------------------|
| Zero-point correction=                       | 0.290922 (Hartree/Particle) |
| Thermal correction to Energy=                | 0.306331                    |
| Thermal correction to Enthalpy=              | 0.307275                    |
| Thermal correction to Gibbs Free Energy=     | 0.246742                    |
| Sum of electronic and zero-point Energies=   | -808.705647                 |
| Sum of electronic and thermal Energies=      | -808.690239                 |
| Sum of electronic and thermal Enthalpies=    | -808.689295                 |
| Sum of electronic and thermal Free Energies= | -808.749828                 |

|       | E (Thermal) | CV             | S              |
|-------|-------------|----------------|----------------|
|       | KCal/Mol    | Cal/Mol-Kelvin | Cal/Mol-Kelvin |
| Total | 192.225     | 62.984         | 127.402        |
| C     | 2.18559     | 0.83709        | -2.78727       |
| C     | 1.54872     | 1.16099        | -1.43001       |
| C     | 2.66782     | 1.05276        | -0.48892       |
| C     | 3.63404     | 0.21359        | -1.03196       |
| C     | 3.23726     | -0.11921       | -2.32445       |
| C     | 0.81872     | -0.25105       | -1.03186       |
| C     | -0.15662    | -0.22671       | -0.04516       |
| O     | 1.29482     | -1.21494       | -1.68356       |
| H     | 0.89303     | 2.02036        | -1.34606       |
| H     | 2.65565     | 1.44957        | 0.51639        |
| H     | 4.4697      | -0.21874       | -0.4995        |
| H     | 3.72221     | -0.84679       | -2.96141       |
| H     | 2.65828     | 1.74218        | -3.19173       |
| H     | 1.50217     | 0.42682        | -3.52659       |
| C     | -0.54043    | 1.07377        | 0.59493        |

|   |          |          |          |
|---|----------|----------|----------|
| C | -1.53959 | 1.88221  | 0.03307  |
| C | 0.05914  | 1.50199  | 1.78688  |
| C | -1.9027  | 3.09178  | 0.62261  |
| H | -2.0324  | 1.55382  | -0.87586 |
| C | -0.30575 | 2.70879  | 2.38426  |
| H | 0.80794  | 0.87136  | 2.25407  |
| C | -1.28407 | 3.51089  | 1.80004  |
| H | -2.67269 | 3.70415  | 0.16584  |
| H | 0.17189  | 3.01944  | 3.30725  |
| H | -1.56805 | 4.44992  | 2.26182  |
| C | -0.95006 | -1.41639 | 0.29933  |
| C | -1.89106 | -1.3595  | 1.35321  |
| C | -0.80642 | -2.65605 | -0.36583 |
| C | -2.62321 | -2.47728 | 1.73568  |
| H | -2.0415  | -0.42941 | 1.88578  |
| C | -1.5399  | -3.77036 | 0.02606  |
| H | -0.11604 | -2.73151 | -1.19307 |
| C | -2.45268 | -3.69466 | 1.07772  |
| H | -3.33176 | -2.39535 | 2.55311  |
| H | -1.40295 | -4.70653 | -0.50498 |
| H | -3.02683 | -4.56566 | 1.37324  |

### **2ndTS giving 2+2 (15) B3LYP/6-311+G(d,p)**

E(RB+HF-LYP) = -808.995562396

|                                              |                             |
|----------------------------------------------|-----------------------------|
| Zero-point correction=                       | 0.290869 (Hartree/Particle) |
| Thermal correction to Energy=                | 0.306200                    |
| Thermal correction to Enthalpy=              | 0.307144                    |
| Thermal correction to Gibbs Free Energy=     | 0.247677                    |
| Sum of electronic and zero-point Energies=   | -808.704693                 |
| Sum of electronic and thermal Energies=      | -808.689362                 |
| Sum of electronic and thermal Enthalpies=    | -808.688418                 |
| Sum of electronic and thermal Free Energies= | -808.747885                 |

|       | E (Thermal) | CV             | S              |
|-------|-------------|----------------|----------------|
|       | KCal/Mol    | Cal/Mol-Kelvin | Cal/Mol-Kelvin |
| Total | 192.144     | 63.162         | 125.160        |

|   |          |          |          |
|---|----------|----------|----------|
| C | -1.31425 | 1.66116  | -1.23742 |
| C | -1.5131  | 1.79351  | 0.23066  |
| C | -2.89633 | 1.64371  | 0.51083  |
| C | -3.60195 | 1.60878  | -0.65711 |
| C | -2.71023 | 1.86731  | -1.8387  |
| O | -1.92552 | -0.66756 | -1.48503 |
| C | -1.05599 | 0.1042   | -1.0812  |
| C | 0.02444  | -0.22448 | -0.18117 |
| H | -0.50395 | 2.22679  | -1.68298 |
| H | -0.74785 | 2.05672  | 0.94282  |
| H | -3.31682 | 1.54613  | 1.50302  |
| H | -4.6717  | 1.45918  | -0.73521 |
| H | -2.83363 | 2.9024   | -2.18495 |
| H | -2.91299 | 1.19847  | -2.67562 |
| C | 1.22532  | 0.65202  | -0.11577 |
| C | 1.8711   | 1.08067  | -1.28659 |
| C | 1.77247  | 1.04927  | 1.11713  |
| C | 3.00258  | 1.89268  | -1.22967 |
| H | 1.49225  | 0.7545   | -2.24895 |

|   |          |          |          |
|---|----------|----------|----------|
| C | 2.90073  | 1.86126  | 1.17538  |
| H | 1.30064  | 0.71674  | 2.03549  |
| C | 3.52027  | 2.29059  | 0.00092  |
| H | 3.48533  | 2.20478  | -2.14935 |
| H | 3.29756  | 2.16039  | 2.13936  |
| H | 4.40044  | 2.92181  | 0.04624  |
| C | 0.12236  | -1.56406 | 0.42206  |
| C | 1.36999  | -2.11196 | 0.78694  |
| C | -1.03109 | -2.33228 | 0.70037  |
| C | 1.46241  | -3.35304 | 1.40956  |
| H | 2.27799  | -1.56449 | 0.56985  |
| C | -0.93448 | -3.56215 | 1.3352   |
| H | -1.99821 | -1.957   | 0.39889  |
| C | 0.31128  | -4.08375 | 1.69334  |
| H | 2.43769  | -3.75026 | 1.66895  |
| H | -1.83723 | -4.12544 | 1.54525  |
| H | 0.38138  | -5.05073 | 2.17891  |

**Another diphenyl TS giving 2+2 directly (Similar to 10) B3LYP/6-311+G(d,p)**

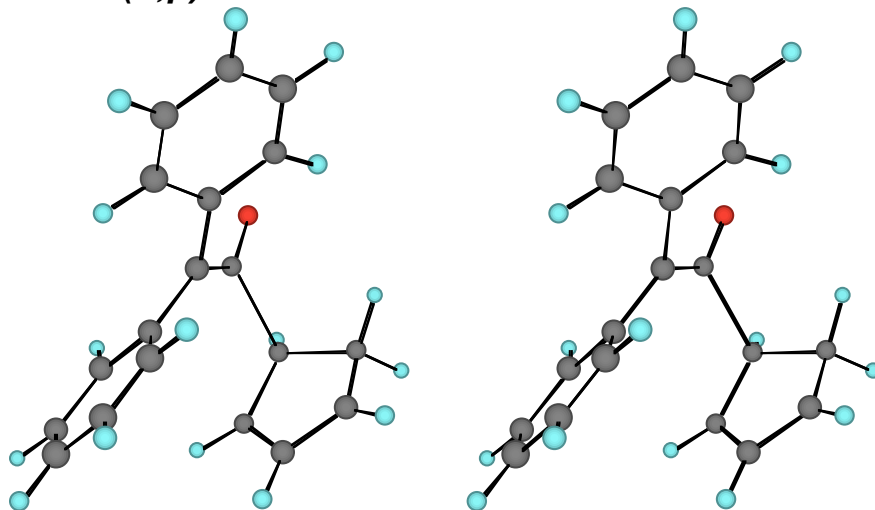

key distances 1.819 3.171  
E(RB+HF-LYP) = -808.979959514

|                                              |                             |
|----------------------------------------------|-----------------------------|
| Zero-point correction=                       | 0.288934 (Hartree/Particle) |
| Thermal correction to Energy=                | 0.305182                    |
| Thermal correction to Enthalpy=              | 0.306126                    |
| Thermal correction to Gibbs Free Energy=     | 0.243655                    |
| Sum of electronic and zero-point Energies=   | -808.691026                 |
| Sum of electronic and thermal Energies=      | -808.674778                 |
| Sum of electronic and thermal Enthalpies=    | -808.673834                 |
| Sum of electronic and thermal Free Energies= | -808.736305                 |

|       | E (Thermal) | CV             | S              |
|-------|-------------|----------------|----------------|
|       | KCal/Mol    | Cal/Mol-Kelvin | Cal/Mol-Kelvin |
| Total | 191.504     | 64.691         | 131.481        |
| C     | 0 -2.25313  | -1.19327       | -0.92742       |
| C     | 0 -2.73596  | 0.14719        | -0.98958       |
| C     | 0 -2.99863  | 0.63001        | 0.32238        |



|   |   |          |          |          |
|---|---|----------|----------|----------|
| C | 0 | -2.86963 | -0.39902 | 1.20953  |
| C | 0 | -2.6104  | -1.68177 | 0.48368  |
| C | 0 | -0.4449  | -1.38383 | -0.96552 |
| O | 0 | -0.20165 | -2.48858 | -1.38757 |
| C | 0 | 0.32905  | -0.37419 | -0.36451 |
| H | 0 | -2.4801  | -1.84309 | -1.76565 |
| H | 0 | -2.91594 | 0.70144  | -1.89803 |
| H | 0 | -3.24948 | 1.65291  | 0.5682   |
| H | 0 | -2.99    | -0.32581 | 2.28294  |
| H | 0 | -3.54234 | -2.26699 | 0.43563  |
| H | 0 | -1.86584 | -2.32438 | 0.95584  |
| C | 0 | 0.04833  | 1.04086  | -0.56112 |
| C | 0 | -0.40257 | 1.52213  | -1.80786 |
| C | 0 | 0.22815  | 1.99493  | 0.47004  |
| C | 0 | -0.67108 | 2.88003  | -2.01478 |
| H | 0 | -0.47134 | 0.83488  | -2.64268 |
| C | 0 | -0.03972 | 3.33629  | 0.26433  |
| H | 0 | 0.55966  | 1.65717  | 1.44446  |
| C | 0 | -0.49486 | 3.79079  | -0.98378 |
| H | 0 | -1.00104 | 3.21817  | -2.99124 |
| H | 0 | 0.09439  | 4.04111  | 1.07793  |
| H | 0 | -0.69608 | 4.84448  | -1.14067 |
| C | 0 | 1.48746  | -0.82479 | 0.43844  |
| C | 0 | 2.626    | -0.00447 | 0.58355  |
| C | 0 | 1.52806  | -2.09017 | 1.05752  |
| C | 0 | 3.73069  | -0.42091 | 1.31932  |
| H | 0 | 2.65396  | 0.9596   | 0.09194  |
| C | 0 | 2.63374  | -2.50347 | 1.79153  |
| H | 0 | 0.68664  | -2.76393 | 0.95729  |
| C | 0 | 3.7437   | -1.67141 | 1.93481  |
| H | 0 | 4.5926   | 0.23314  | 1.39885  |
| H | 0 | 2.62686  | -3.48392 | 2.25565  |
| H | 0 | 4.60558  | -1.99568 | 2.50664  |

### Dichloro 1st TS (18) B3LYP/6-311+G\*\*

E(RB+HF-LYP) = -1266.01031300

|                                              |                             |
|----------------------------------------------|-----------------------------|
| Zero-point correction=                       | 0.109325 (Hartree/Particle) |
| Thermal correction to Energy=                | 0.118762                    |
| Thermal correction to Enthalpy=              | 0.119706                    |
| Thermal correction to Gibbs Free Energy=     | 0.073569                    |
| Sum of electronic and zero-point Energies=   | -1265.900988                |
| Sum of electronic and thermal Energies=      | -1265.891551                |
| Sum of electronic and thermal Enthalpies=    | -1265.890607                |
| Sum of electronic and thermal Free Energies= | -1265.936744                |

|       | E (Thermal) | CV             | S              |
|-------|-------------|----------------|----------------|
|       | KCal/Mol    | Cal/Mol-Kelvin | Cal/Mol-Kelvin |
| Total | 74.524      | 34.046         | 97.104         |

C,0,-1.2782758451,0.6926999196,-0.6774922699  
C,0,-1.5094690428,0.9938290558,0.6652992614  
C,0,-2.5819145263,0.1830160888,1.1653599889  
C,0,-3.081593513,-0.5611795607,0.1445302342  
C,0,-2.4058819717,-0.1982471289,-1.140537088  
O,0,-0.4218245253,-1.7351234311,-0.013621801  
C,0,0.0930236246,-0.6540397981,-0.0894965425

C,0,1.2953422759,-0.0425313781,0.0381294607  
 Cl,0,1.6277059042,1.663803606,-0.1065728606  
 Cl,0,2.7122667907,-1.0635836552,0.1448372494  
 H,0,-0.719599561,1.3275088519,-1.3498618282  
 H,0,-0.9422692802,1.7074135412,1.2467984208  
 H,0,-2.8944508633,0.1426527876,2.1993850558  
 H,0,-3.8611629939,-1.3070870399,0.2238908488  
 H,0,-3.0841935895,0.39139415,-1.7743143439  
 H,0,-2.0906493328,-1.0659171971,-1.7221766246

### Dichloro intermediate (19) B3LYP/6-311+G\*\*

E(RB+HF-LYP) = -1266.01503050

|                                              |                             |
|----------------------------------------------|-----------------------------|
| Zero-point correction=                       | 0.110898 (Hartree/Particle) |
| Thermal correction to Energy=                | 0.120240                    |
| Thermal correction to Enthalpy=              | 0.121184                    |
| Thermal correction to Gibbs Free Energy=     | 0.075104                    |
| Sum of electronic and zero-point Energies=   | -1265.904132                |
| Sum of electronic and thermal Energies=      | -1265.894790                |
| Sum of electronic and thermal Enthalpies=    | -1265.893846                |
| Sum of electronic and thermal Free Energies= | -1265.939927                |

|       | E (Thermal) | CV             | S              |
|-------|-------------|----------------|----------------|
|       | KCal/Mol    | Cal/Mol-Kelvin | Cal/Mol-Kelvin |
| Total | 75.452      | 34.261         | 96.985         |

C,0,-1.1266404498,0.5711967497,-0.7794288239  
 C,0,-1.3720861117,0.9585257614,0.6165232493  
 C,0,-2.4116234949,0.162270245,1.1404959139  
 C,0,-2.9535856815,-0.5907218887,0.1319239299  
 C,0,-2.384241071,-0.1965966475,-1.1948992102  
 O,0,-0.3684405195,-1.7056662064,-0.3432953428  
 C,0,-0.024185242,-0.5261540547,-0.3680691943  
 C,0,1.1812263585,0.0124135167,0.1214615581  
 Cl,0,1.6954611753,1.6554623031,-0.1993972249  
 Cl,0,2.4644525493,-1.0635240553,0.5617366361  
 H,0,-0.7398712266,1.3240776502,-1.4596033109  
 H,0,-0.8049924444,1.7022551086,1.1560574186  
 H,0,-2.6925512828,0.1170170397,2.1836701707  
 H,0,-3.7242072792,-1.340788928,0.2564606397  
 H,0,-3.0784751493,0.480517892,-1.7117016678  
 H,0,-2.1840976252,-1.0463014166,-1.8463350347

### 2ndTS Dichloro 2+2 side (21) B3LYP/6-311+G\*\*

E(RB+HF-LYP) = -1266.01468729

|                                              |                             |
|----------------------------------------------|-----------------------------|
| Zero-point correction=                       | 0.110994 (Hartree/Particle) |
| Thermal correction to Energy=                | 0.119418                    |
| Thermal correction to Enthalpy=              | 0.120362                    |
| Thermal correction to Gibbs Free Energy=     | 0.076872                    |
| Sum of electronic and zero-point Energies=   | -1265.903693                |
| Sum of electronic and thermal Energies=      | -1265.895269                |
| Sum of electronic and thermal Enthalpies=    | -1265.894325                |
| Sum of electronic and thermal Free Energies= | -1265.937815                |

| E (Thermal) | CV | S |
|-------------|----|---|
|-------------|----|---|

|       | KCal/Mol | Cal/Mol-Kelvin | Cal/Mol-Kelvin |
|-------|----------|----------------|----------------|
| Total | 74.936   | 32.136         | 91.532         |

C,0,-1.1417738837,0.5742135658,-0.8214741734  
 C,0,-1.2184048206,0.8812960054,0.6304957426  
 C,0,-2.2229156485,0.062979271,1.2108608796  
 C,0,-2.9002407195,-0.5973112703,0.2283268933  
 C,0,-2.4525601482,-0.1567475363,-1.1352649253  
 O,0,-0.2793057082,-1.7019540563,-0.6520427613  
 C,0,-0.0205929922,-0.5107281174,-0.5694652408  
 C,0,1.1074937606,0.0431273857,0.1195750868  
 Cl,0,1.7026504866,1.6570316426,-0.2357867526  
 Cl,0,2.3228011326,-1.0332981518,0.7254844151  
 H,0,-0.8419185353,1.3745804859,-1.4918420186  
 H,0,-0.667179068,1.6602208202,1.1331098994  
 H,0,-2.3973444872,-0.0354746077,2.27358485  
 H,0,-3.6907580991,-1.3187372247,0.3929390943  
 H,0,-3.1844642044,0.5388371453,-1.566281201  
 H,0,-2.3226007524,-0.9882393366,-1.8283543721

### **2ndTS dichloro 4+2 side (20) B3LYP/6-311+G\*\***

E(RB+HF-LYP) = -1266.01342260

|                                              |                             |
|----------------------------------------------|-----------------------------|
| Zero-point correction=                       | 0.111226 (Hartree/Particle) |
| Thermal correction to Energy=                | 0.119674                    |
| Thermal correction to Enthalpy=              | 0.120618                    |
| Thermal correction to Gibbs Free Energy=     | 0.076687                    |
| Sum of electronic and zero-point Energies=   | -1265.902197                |
| Sum of electronic and thermal Energies=      | -1265.893749                |
| Sum of electronic and thermal Enthalpies=    | -1265.892805                |
| Sum of electronic and thermal Free Energies= | -1265.936736                |

|       | E (Thermal) | CV             | S              |
|-------|-------------|----------------|----------------|
|       | KCal/Mol    | Cal/Mol-Kelvin | Cal/Mol-Kelvin |
| Total | 75.096      | 31.887         | 92.461         |

C,0,2.3633662244,0.1256471148,-1.108538549  
 C,0,1.1368759879,0.8413240722,-0.5277287989  
 C,0,1.4702872574,0.996072669,0.9021925666  
 C,0,2.3915947419,0.0200423544,1.252321532  
 C,0,2.7446105558,-0.6761002577,0.0950285697  
 C,0,0.0978545581,-0.3656443765,-0.3187818373  
 C,0,-1.2014704567,-0.0497991396,-0.0002755789  
 O,0,0.6298719652,-1.5030603935,-0.3467466079  
 Cl,0,-2.3940237241,-1.2967849312,0.1782208554  
 Cl,0,-1.845275756,1.5762179636,-0.09054857  
 H,0,0.7286848634,1.6968235565,-1.055218488  
 H,0,0.9498239275,1.6615780906,1.577302624  
 H,0,2.6706560698,-0.2540443681,2.2599465646  
 H,0,3.3516724772,-1.5708056962,0.0637277321  
 H,0,3.1467477057,0.8613681558,-1.3320617494  
 H,0,2.162817182,-0.4700527597,-1.9954600952

**Dichloro alternative 2+2 TS (similar to 10) B3LYP/6-311+G\*\***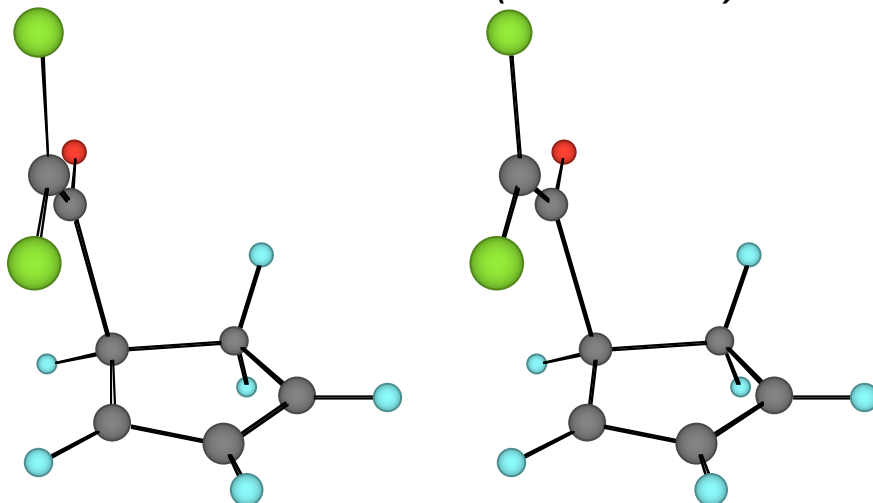

key distances 1.833 3.095  
 E(RB+HF-LYP) = -1265.99133839

|                                              |                             |
|----------------------------------------------|-----------------------------|
| Zero-point correction=                       | 0.108954 (Hartree/Particle) |
| Thermal correction to Energy=                | 0.118501                    |
| Thermal correction to Enthalpy=              | 0.119445                    |
| Thermal correction to Gibbs Free Energy=     | 0.072361                    |
| Sum of electronic and zero-point Energies=   | -1265.882385                |
| Sum of electronic and thermal Energies=      | -1265.872838                |
| Sum of electronic and thermal Enthalpies=    | -1265.871893                |
| Sum of electronic and thermal Free Energies= | -1265.918977                |

|       | E (Thermal) | CV             | S              |
|-------|-------------|----------------|----------------|
|       | KCal/Mol    | Cal/Mol-Kelvin | Cal/Mol-Kelvin |
| Total | 74.360      | 33.888         | 99.096         |

```

C,0,-0.3538215519,-0.5224110099,-1.5766208318
C,0,-1.3477456012,0.480358426,-1.4742593714
C,0,-2.5480355193,-0.0480008508,-0.9158554245
C,0,-2.4077495604,-1.3970843274,-0.7853109604
C,0,-1.0758667113,-1.8409288118,-1.286687916
C,0,0.9870986323,-0.4756855008,-0.3283587312
O,0,1.7457291597,-1.3961466242,-0.5510276032
C,0,0.911997983,0.4811660692,0.6404861941
Cl,0,-0.1827206086,1.8351273554,0.7273782524
Cl,0,1.9633380907,0.3131969399,2.0294153999
H,0,0.3176577281,-0.46034224,-2.4278473794
H,0,-1.2314683791,1.4961446713,-1.8237951909
H,0,-3.4194387698,0.5343823123,-0.6503099492
H,0,-3.1516693032,-2.0706658619,-0.3782229531
H,0,-1.2002294321,-2.4123768332,-2.2186202008
H,0,-0.5464483443,-2.5039660427,-0.5988333434
  
```

**MP2/6-311+G\*\* Single Point Energies of Selected B3LYP/6-311+G\*\* Structures**

1 MP2=-193.5407574  
 2 MP2=-613.0664258

3 MP2=-806.6354869

4 MP2=-806.6534785

5 MP2=-1070.3191294

7 MP2=-1263.9340279

8 MP2=-1263.904964

**Cyclopentadiene (1) BPW91/6-311+G\*\***

E(RB-PW91) = -194.124726721

|                                              |                             |
|----------------------------------------------|-----------------------------|
| Zero-point correction=                       | 0.089799 (Hartree/Particle) |
| Thermal correction to Energy=                | 0.094069                    |
| Thermal correction to Enthalpy=              | 0.095013                    |
| Thermal correction to Gibbs Free Energy=     | 0.063141                    |
| Sum of electronic and zero-point Energies=   | -194.034928                 |
| Sum of electronic and thermal Energies=      | -194.030658                 |
| Sum of electronic and thermal Enthalpies=    | -194.029714                 |
| Sum of electronic and thermal Free Energies= | -194.061585                 |

|       | E (Thermal) | CV             | S              |
|-------|-------------|----------------|----------------|
|       | KCal/Mol    | Cal/Mol-Kelvin | Cal/Mol-Kelvin |
| Total | 59.029      | 16.286         | 67.079         |

C,0,0.286107462,-0.1520561786,-1.1733662859  
 C,0,-0.6462520581,0.8623395552,-0.5655369773  
 C,0,-0.6766851618,0.681783033,0.7793302264  
 C,0,0.208814538,-0.4330459106,1.1397317785  
 C,0,0.7803983285,-0.9337443106,0.0150720495  
 H,0,-1.1940788268,1.6083194681,-1.1383362816  
 H,0,-1.2600185936,1.2626881998,1.493196144  
 H,0,0.3702079822,-0.7896019126,2.1566645326  
 H,0,1.4833867737,-1.7622643899,-0.0486922208  
 H,0,1.1147075053,0.3273914338,-1.7261900036  
 H,0,-0.228503492,-0.7981899299,-1.9080269182

**Diphenylketene (2) BPW91/6-311+G\*\***

E(RB-PW91) = -614.791014352

|                                              |                             |
|----------------------------------------------|-----------------------------|
| Zero-point correction=                       | 0.190158 (Hartree/Particle) |
| Thermal correction to Energy=                | 0.202498                    |
| Thermal correction to Enthalpy=              | 0.203442                    |
| Thermal correction to Gibbs Free Energy=     | 0.149675                    |
| Sum of electronic and zero-point Energies=   | -614.600856                 |
| Sum of electronic and thermal Energies=      | -614.588517                 |
| Sum of electronic and thermal Enthalpies=    | -614.587572                 |
| Sum of electronic and thermal Free Energies= | -614.641339                 |

|       | E (Thermal) | CV             | S              |
|-------|-------------|----------------|----------------|
|       | KCal/Mol    | Cal/Mol-Kelvin | Cal/Mol-Kelvin |
| Total | 127.069     | 48.119         | 113.162        |

C,0,2.0334594686,0.786037937,0.0406200854  
 O,0,3.1277858934,1.2090397549,0.0624639302  
 C,0,0.7904724794,0.3055610175,0.0158037996  
 C,0,0.129699988,0.001579188,1.3158751972

C,0,-1.2459069554,0.2637780239,1.4841265298  
 C,0,0.8528410405,-0.525997641,2.4052692487  
 C,0,-1.8740559543,0.0019310708,2.7046935617  
 H,0,-1.8183712879,0.6801141919,0.6544235232  
 C,0,0.2235168187,-0.7671746896,3.6304855666  
 H,0,1.9124274427,-0.7615996523,2.2859368438  
 C,0,-1.1435339254,-0.5091414606,3.7856721832  
 H,0,-2.9400085358,0.2094878229,2.8148341418  
 H,0,0.802051008,-1.1740861394,4.4616722694  
 H,0,-1.6365340413,-0.7076602182,4.7383750196  
 C,0,0.1426962857,0.1037206235,-1.3104226259  
 C,0,-0.692113938,-1.013101083,-1.5229109791  
 C,0,0.3603657952,0.9951465366,-2.3809473028  
 C,0,-1.2901955622,-1.2252568633,-2.7679833041  
 H,0,-0.864171329,-1.7173697189,-0.7081344648  
 C,0,-0.224522272,0.7669674639,-3.6304334803  
 H,0,0.9811308932,1.8804267918,-2.2279748605  
 C,0,-1.056262705,-0.3411929349,-3.8296244734  
 H,0,-1.9348461696,-2.0941904672,-2.9123627882  
 H,0,-0.0415850297,1.4683651783,-4.4463532377  
 H,0,-1.5211434801,-0.512948961,-4.8014719277

### **Diphenyl 4+2 product (3) BPW91/6-311+G\*\***

E(RB-PW91) = -808.916083578

|                                              |                             |
|----------------------------------------------|-----------------------------|
| Zero-point correction=                       | 0.286531 (Hartree/Particle) |
| Thermal correction to Energy=                | 0.302299                    |
| Thermal correction to Enthalpy=              | 0.303243                    |
| Thermal correction to Gibbs Free Energy=     | 0.241663                    |
| Sum of electronic and zero-point Energies=   | -808.629552                 |
| Sum of electronic and thermal Energies=      | -808.613784                 |
| Sum of electronic and thermal Enthalpies=    | -808.612840                 |
| Sum of electronic and thermal Free Energies= | -808.674421                 |

|       | E (Thermal) | CV             | S              |
|-------|-------------|----------------|----------------|
|       | KCal/Mol    | Cal/Mol-Kelvin | Cal/Mol-Kelvin |
| Total | 189.696     | 65.079         | 129.607        |

C,0,-2.4514198272,0.3535784706,-0.1417008036  
 C,0,-3.0957589182,-0.0757089729,1.1797538416  
 C,0,-3.4719103749,-1.3629821215,1.0440098993  
 C,0,-3.0513745244,-1.7665779657,-0.3576149313  
 C,0,-3.3036267227,-0.4771210752,-1.1496399891  
 O,0,-1.5475756497,-1.7901552848,-0.3522718338  
 C,0,-1.1613794481,-0.4763788898,-0.2006353075  
 C,0,0.1342763788,-0.0676476879,-0.0920800537  
 H,0,-2.331652188,1.4247470366,-0.3110515574  
 H,0,-3.1106109539,0.5363478357,2.0799687182  
 H,0,-3.8617501636,-2.0360977539,1.8050335189  
 H,0,-3.3762576969,-2.7304533152,-0.7569372516  
 H,0,-4.3566961049,-0.1721711995,-1.1622612502  
 H,0,-2.8889458542,-0.5090618676,-2.1664456727  
 C,0,0.4027415815,1.4051050595,-0.0070766291  
 C,0,0.1231620163,2.2677417269,-1.0846649688  
 C,0,0.9653543562,1.959999442,1.160091599  
 C,0,0.3716817422,3.6432686265,-0.9913050445  
 H,0,-0.280818587,1.8480671299,-2.008210861

C,0,1.2148449395,3.3327578863,1.2552229054  
 H,0,1.2024241075,1.3027179734,1.9986604945  
 C,0,0.9157359854,4.1811269493,0.1804786235  
 H,0,0.1486239126,4.2932879155,-1.8396692828  
 H,0,1.642119506,3.7429507276,2.172302923  
 H,0,1.1119362921,5.252118891,0.2545604787  
 C,0,1.305181793,-0.9796196238,-0.0706905278  
 C,0,2.5710017467,-0.5027800868,-0.4848547724  
 C,0,1.2263947283,-2.3221366265,0.3687592164  
 C,0,3.6995644244,-1.3270230863,-0.4717169843  
 H,0,2.6667589031,0.5286464029,-0.8258338065  
 C,0,2.3588506403,-3.1400169134,0.3899905086  
 H,0,0.2699395177,-2.7225444639,0.697646  
 C,0,3.6023829904,-2.6524935009,-0.0325927143  
 H,0,4.6599056437,-0.9295019276,-0.806103752  
 H,0,2.2682381122,-4.1696631388,0.7422049786  
 H,0,4.4831697055,-3.2966976303,-0.018092211

### Diphenyl 2+2 product (4) BPW91/6-311+G\*\*

E(RB-PW91) = -808.927937172

|                                              |                             |
|----------------------------------------------|-----------------------------|
| Zero-point correction=                       | 0.285170 (Hartree/Particle) |
| Thermal correction to Energy=                | 0.301487                    |
| Thermal correction to Enthalpy=              | 0.302431                    |
| Thermal correction to Gibbs Free Energy=     | 0.240060                    |
| Sum of electronic and zero-point Energies=   | -808.642767                 |
| Sum of electronic and thermal Energies=      | -808.626451                 |
| Sum of electronic and thermal Enthalpies=    | -808.625506                 |
| Sum of electronic and thermal Free Energies= | -808.687877                 |

|       | E (Thermal) | CV             | S              |
|-------|-------------|----------------|----------------|
|       | KCal/Mol    | Cal/Mol-Kelvin | Cal/Mol-Kelvin |
| Total | 189.186     | 66.041         | 131.270        |

C,0,-2.2221330212,-1.280010878,-0.3287015579  
 C,0,-1.5525911186,-0.0385455789,-1.0135207256  
 C,0,-2.5072162734,1.0735940591,-0.6518870393  
 C,0,-3.6209913372,0.6252087862,-0.0481144243  
 C,0,-3.6438601123,-0.8790342736,0.120499875  
 C,0,-1.1271825891,-1.1920390365,0.7427685779  
 O,0,-1.0189268612,-1.6737513712,1.8477480069  
 C,0,-0.2632174177,-0.189083866,-0.0891121444  
 H,0,-2.1668531917,-2.2257638283,-0.8852555105  
 H,0,-1.3578809628,-0.0973176904,-2.0921496334  
 H,0,-2.3025333451,2.1210929342,-0.8732270538  
 H,0,-4.4448093536,1.2613572374,0.2801224221  
 H,0,-4.4239125591,-1.3444901762,-0.5057271555  
 H,0,-3.8460190701,-1.1902806517,1.1579589475  
 C,0,0.2603380218,1.068549888,0.5987415203  
 C,0,0.6810354429,2.1585371515,-0.1862929171  
 C,0,0.3487060323,1.1719022422,1.9963427993  
 C,0,1.1662269725,3.3261451229,0.4095168705  
 H,0,0.6347239761,2.091164207,-1.2751906747  
 C,0,0.8397240213,2.3414635371,2.5925613294  
 H,0,0.0346569782,0.335665124,2.6202521048  
 C,0,1.2479749206,3.4222216376,1.8049515793  
 H,0,1.4856707071,4.1609995613,-0.2171438841

H,0,0.9003374352,2.4042901477,3.6806980762  
 H,0,1.6297509484,4.3316455856,2.2718822578  
 C,0,0.8980516472,-0.9549024134,-0.7461370069  
 C,0,1.1887935644,-0.8453299012,-2.1165185102  
 C,0,1.7373752627,-1.7526802384,0.0549068571  
 C,0,2.2885474084,-1.5119349411,-2.6717839364  
 H,0,0.5640441335,-0.2301451866,-2.7651544783  
 C,0,2.8315022193,-2.4226926979,-0.5006806515  
 H,0,1.5282828566,-1.8493916801,1.1211166896  
 C,0,3.1130793361,-2.3050949927,-1.8673696316  
 H,0,2.4980548194,-1.4091195789,-3.7381231816  
 H,0,3.4659448562,-3.0395912485,0.1381888641  
 H,0,3.9669787809,-2.8277454276,-2.3012570262

### **Dichloroketene (5) BPW91/6-311+G\*\***

E(RB-PW91) = -1071.85872604

|                                              |                             |
|----------------------------------------------|-----------------------------|
| Zero-point correction=                       | 0.014826 (Hartree/Particle) |
| Thermal correction to Energy=                | 0.020019                    |
| Thermal correction to Enthalpy=              | 0.020963                    |
| Thermal correction to Gibbs Free Energy=     | -0.015091                   |
| Sum of electronic and zero-point Energies=   | -1071.843900                |
| Sum of electronic and thermal Energies=      | -1071.838707                |
| Sum of electronic and thermal Enthalpies=    | -1071.837763                |
| Sum of electronic and thermal Free Energies= | -1071.873817                |

|       | E (Thermal)<br>KCal/Mol | CV<br>Cal/Mol-Kelvin | S<br>Cal/Mol-Kelvin |
|-------|-------------------------|----------------------|---------------------|
| Total | 12.562                  | 15.766               | 75.882              |

C,0,1.2209785127,-0.5312814801,-0.2385305788  
 C,0,0.0259977729,-0.0113062491,-0.0050455784  
 O,0,2.2799073081,-0.9920560865,-0.4454320662  
 Cl,0,-1.3074022163,-1.0509147185,0.4017672612  
 Cl,0,-0.2056046178,1.7092661931,-0.1061841158

### **Dichloro 2+2 product (7) BPW91/6-311+G\*\***

E(RB-PW91) = -1266.03060275

|                                              |                             |
|----------------------------------------------|-----------------------------|
| Zero-point correction=                       | 0.109698 (Hartree/Particle) |
| Thermal correction to Energy=                | 0.118768                    |
| Thermal correction to Enthalpy=              | 0.119713                    |
| Thermal correction to Gibbs Free Energy=     | 0.074597                    |
| Sum of electronic and zero-point Energies=   | -1265.920905                |
| Sum of electronic and thermal Energies=      | -1265.911834                |
| Sum of electronic and thermal Enthalpies=    | -1265.910890                |
| Sum of electronic and thermal Free Energies= | -1265.956006                |

|       | E (Thermal)<br>KCal/Mol | CV<br>Cal/Mol-Kelvin | S<br>Cal/Mol-Kelvin |
|-------|-------------------------|----------------------|---------------------|
| Total | 74.528                  | 33.815               | 94.954              |

C,0,-0.6551080206,-0.9181013112,-1.1401989059  
 C,0,-0.4095998161,0.6199882541,-0.9132485414  
 C,0,-1.7484623263,1.0888405326,-0.3995266198  
 C,0,-2.6886664551,0.1319198043,-0.4697656335



C,0,-2.1759026035,-1.1723234732,-1.0366773382  
 C,0,0.1445668529,-1.1931828909,0.1517806709  
 O,0,0.2577277913,-2.1263046993,0.8969625682  
 C,0,0.6591308374,0.2884351909,0.1845827552  
 Cl,0,2.3405998835,0.3161968035,-0.5087724854  
 Cl,0,0.6019044719,1.1620170937,1.7405164957  
 H,0,-0.1726159619,-1.3618931843,-2.02039432  
 H,0,-0.0070175285,1.2228747663,-1.736965218  
 H,0,-1.9082696364,2.1027730843,-0.0347830843  
 H,0,-3.729118008,0.2669907644,-0.170496239  
 H,0,-2.6219622248,-1.3868656333,-2.0220957289  
 H,0,-2.4011638251,-2.0365350957,-0.3922924546

### **Dichloro 4+2 product (8) BPW91/6-311+G\*\***

E(RB-PW91) = -1266.00510846

|                                              |                             |
|----------------------------------------------|-----------------------------|
| Zero-point correction=                       | 0.111261 (Hartree/Particle) |
| Thermal correction to Energy=                | 0.119770                    |
| Thermal correction to Enthalpy=              | 0.120714                    |
| Thermal correction to Gibbs Free Energy=     | 0.076718                    |
| Sum of electronic and zero-point Energies=   | -1265.893848                |
| Sum of electronic and thermal Energies=      | -1265.885339                |
| Sum of electronic and thermal Enthalpies=    | -1265.884395                |
| Sum of electronic and thermal Free Energies= | -1265.928390                |

|       | E (Thermal) | CV             | S              |
|-------|-------------|----------------|----------------|
|       | KCal/Mol    | Cal/Mol-Kelvin | Cal/Mol-Kelvin |
| Total | 75.157      | 32.738         | 92.597         |

C,0,1.350153317,0.6037700555,0.5122296676  
 C,0,2.0663788392,0.8474538585,-0.8186323727  
 C,0,2.4578752108,-0.3546715414,-1.2870580412  
 C,0,1.9847324843,-1.3724729205,-0.2666007144  
 C,0,2.1662596051,-0.6121856132,1.0532184652  
 O,0,0.4784489613,-1.3933697046,-0.3610568664  
 C,0,0.0911949925,-0.1623504753,0.1016222314  
 C,0,-1.1956640094,0.233456015,0.1344066189  
 Cl,0,-1.6652948604,1.8024202289,0.745571284  
 Cl,0,-2.4973893436,-0.7881096502,-0.3984032299  
 H,0,1.1865619271,1.4624530666,1.1665009081  
 H,0,2.1111634806,1.8110283529,-1.3229269869  
 H,0,2.8935716647,-0.5892692731,-2.2559287826  
 H,0,2.3116270032,-2.4109142256,-0.3545018038  
 H,0,3.2091541738,-0.3511181768,1.2679275518  
 H,0,1.7003788913,-1.1164982164,1.9104119977

**Diphenyl1stTS (Similar to 12) BPW91/6-311+G\*\***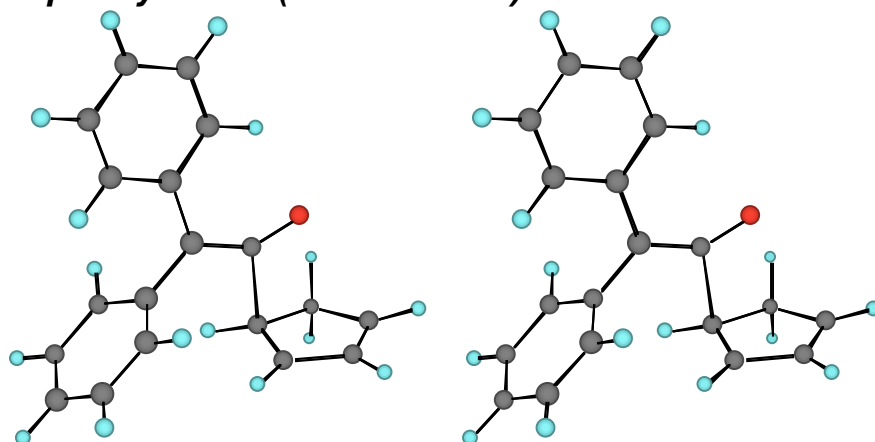

key distances OC 2.886 CC 2.008 CC 3.191  
 E(RB-PW91) = -808.894967419

|                                              |                             |
|----------------------------------------------|-----------------------------|
| Zero-point correction=                       | 0.281871 (Hartree/Particle) |
| Thermal correction to Energy=                | 0.298637                    |
| Thermal correction to Enthalpy=              | 0.299581                    |
| Thermal correction to Gibbs Free Energy=     | 0.236388                    |
| Sum of electronic and zero-point Energies=   | -808.613096                 |
| Sum of electronic and thermal Energies=      | -808.596331                 |
| Sum of electronic and thermal Enthalpies=    | -808.595386                 |
| Sum of electronic and thermal Free Energies= | -808.658579                 |

|       | E (Thermal) | CV             | S              |
|-------|-------------|----------------|----------------|
|       | KCal/Mol    | Cal/Mol-Kelvin | Cal/Mol-Kelvin |
| Total | 187.397     | 67.114         | 133.000        |

C,0,2.4627365444,-0.4353235968,0.3351770798  
 C,0,2.6910509675,-0.2449924589,-1.0377193605  
 C,0,3.335586923,-1.40577755,-1.58443707  
 C,0,3.6111743906,-2.2803090012,-0.5687034232  
 C,0,3.235323068,-1.6709284978,0.7477016835  
 O,0,0.7581687522,-2.3952299299,-0.147133484  
 C,0,0.6411289121,-1.1938985753,-0.0365475223  
 C,0,-0.3196698817,-0.2045988209,0.0186214736  
 H,0,2.247412275,0.3793254332,1.0225272572  
 H,0,2.3940243872,0.6367407536,-1.6007474341  
 H,0,3.5297718437,-1.5708281408,-2.6425371123  
 H,0,4.0540989839,-3.2692070914,-0.6756261009  
 H,0,4.145510454,-1.3473293434,1.2890536685  
 H,0,2.6929066302,-2.3572709149,1.4110379937  
 C,0,-1.7344413564,-0.6091467511,0.1753140486  
 C,0,-2.1504986778,-1.9635096702,0.2506817648  
 C,0,-2.7485164625,0.3819151899,0.2396594478  
 C,0,-3.5003600711,-2.2982503226,0.370571634  
 H,0,-1.4065704635,-2.7578059303,0.2150993377  
 C,0,-4.0966622168,0.0374217345,0.3607665181  
 H,0,-2.4740825629,1.4349122655,0.1833142504  
 C,0,-4.4872341067,-1.3050916888,0.4277661483  
 H,0,-3.7832657699,-3.3515972884,0.424798452  
 H,0,-4.8475578076,0.829212653,0.4019888247  
 H,0,-5.5403251001,-1.5734037745,0.5252528793  
 C,0,0.0024391886,1.2567410015,0.0370792622

C,0,0.1257983892,1.988428077,-1.1596835669  
 C,0,0.1240048173,1.9537821222,1.2565057238  
 C,0,0.3978418336,3.3626929662,-1.1412641913  
 H,0,-0.0095056126,1.4691641752,-2.1105467959  
 C,0,0.3998939527,3.3259579801,1.2787683429  
 H,0,-0.0042721035,1.4067917593,2.1929291395  
 C,0,0.5424612868,4.0339440044,0.0785539927  
 H,0,0.490897636,3.910069423,-2.0812704816  
 H,0,0.4983555332,3.8444225684,2.2344394426  
 H,0,0.7549066555,5.1043060388,0.0944826364

### Diphenyl Intermediate (Similar to 13) BPW91/6-311+G\*\*

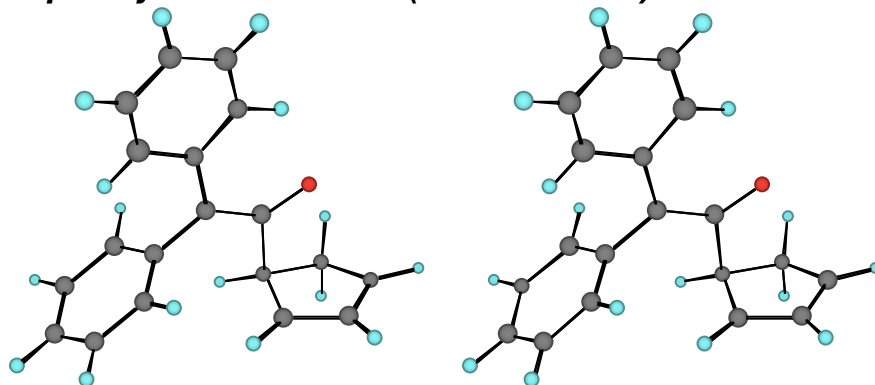

key distances OC 2.691 CC 3.011  
 E(RB-PW91) = -808.897582358

|                                              |                             |
|----------------------------------------------|-----------------------------|
| Zero-point correction=                       | 0.283182 (Hartree/Particle) |
| Thermal correction to Energy=                | 0.299965                    |
| Thermal correction to Enthalpy=              | 0.300909                    |
| Thermal correction to Gibbs Free Energy=     | 0.237531                    |
| Sum of electronic and zero-point Energies=   | -808.614400                 |
| Sum of electronic and thermal Energies=      | -808.597618                 |
| Sum of electronic and thermal Enthalpies=    | -808.596673                 |
| Sum of electronic and thermal Free Energies= | -808.660052                 |

|       | E (Thermal) | CV             | S              |
|-------|-------------|----------------|----------------|
|       | KCal/Mol    | Cal/Mol-Kelvin | Cal/Mol-Kelvin |
| Total | 188.231     | 67.669         | 133.391        |

C,0,-2.3833369664,-0.3688462918,-0.1009775462  
 C,0,-2.3995000556,-0.2860682141,1.3588381043  
 C,0,-2.9214016301,-1.4890177618,1.883399343  
 C,0,-3.3858674202,-2.2684007979,0.8408825098  
 C,0,-3.3766099844,-1.4856884882,-0.4368084288  
 O,0,-0.915079299,-2.3121779176,-0.2233420127  
 C,0,-0.8805558622,-1.0677063512,-0.1678087539  
 C,0,0.2216724529,-0.1822402934,-0.1184860352  
 H,0,-2.423075733,0.5597237367,-0.6729216355  
 H,0,-1.9802437521,0.5375675875,1.9310519937  
 H,0,-2.8946843356,-1.781883714,2.9314291232  
 H,0,-3.7746516545,-3.2818767847,0.9319861786  
 H,0,-4.3753556881,-1.039548979,-0.6063212778  
 H,0,-3.1096054673,-2.0783801304,-1.3185840754  
 C,0,1.5935489864,-0.654796437,-0.3285048869  
 C,0,1.9218139152,-2.0256206748,-0.5266932726

```

C,0,2.6760414587,0.2695679386,-0.3076693568
C,0,3.2491247578,-2.4379331111,-0.6466641179
H,0,1.1171494373,-2.7550788459,-0.5879562191
C,0,3.9987144503,-0.1522694255,-0.4370859843
H,0,2.4710053169,1.3312619751,-0.1740441876
C,0,4.2994003409,-1.5108510509,-0.6034329351
H,0,3.4651583202,-3.4984189875,-0.7919407642
H,0,4.8020064162,0.5867741113,-0.4099377735
H,0,5.334315391,-1.8400173052,-0.7108257317
C,0,0.0060035426,1.3010081715,-0.0670609157
C,0,0.1387795773,2.0165418424,1.1392303871
C,0,-0.2810555764,2.0288951221,-1.2399590454
C,0,-0.0366363739,3.4054302818,1.1787630373
H,0,0.3977454477,1.4721904055,2.0497291858
C,0,-0.4668698719,3.4160264715,-1.201864832
H,0,-0.3526715122,1.4952051348,-2.1900103069
C,0,-0.3476153881,4.1091227034,0.0090090147
H,0,0.0716368626,3.9384449493,2.1253652304
H,0,-0.6949926438,3.9574869344,-2.1220151001
H,0,-0.4870041312,5.1910514499,0.0390937498

```

### Diphenyl 2<sup>nd</sup> TS 4+2 side (Similar to 14) BPW91/6-311+G\*\*

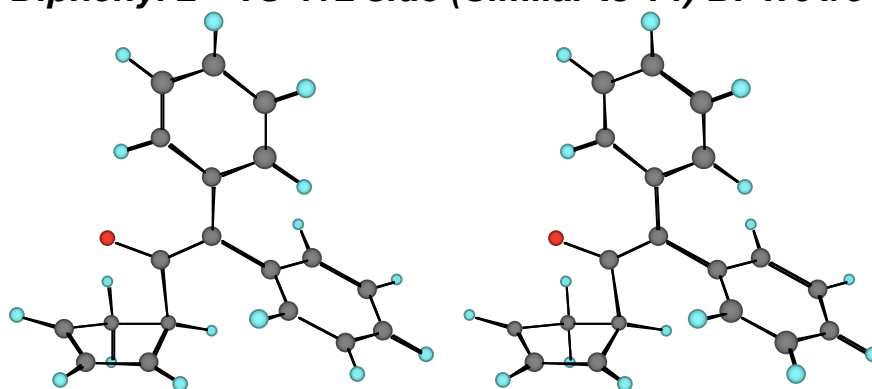

key distances: OC 2.280 CC 3.140  
E(RB-PW91) = -808.896852932

|                                              |                             |
|----------------------------------------------|-----------------------------|
| Zero-point correction=                       | 0.283614 (Hartree/Particle) |
| Thermal correction to Energy=                | 0.299463                    |
| Thermal correction to Enthalpy=              | 0.300407                    |
| Thermal correction to Gibbs Free Energy=     | 0.239074                    |
| Sum of electronic and zero-point Energies=   | -808.613239                 |
| Sum of electronic and thermal Energies=      | -808.597390                 |
| Sum of electronic and thermal Enthalpies=    | -808.596446                 |
| Sum of electronic and thermal Free Energies= | -808.657779                 |

|       | E (Thermal) | CV             | S              |
|-------|-------------|----------------|----------------|
|       | KCal/Mol    | Cal/Mol-Kelvin | Cal/Mol-Kelvin |
| Total | 187.916     | 65.125         | 129.087        |

```

C,0,2.189354148,0.852573526,-2.7874324909
C,0,1.5571992165,1.1671871594,-1.4225061618
C,0,2.6861933146,1.0352230656,-0.47927201
C,0,3.6324330203,0.1752312188,-1.0368642474
C,0,3.2115362731,-0.1470894019,-2.3349623335
C,0,0.8258968368,-0.2324402255,-1.0394774821

```

```

C,0,-0.1585099728,-0.2214966715,-0.0451702144
O,0,1.2945143142,-1.2076697053,-1.70379195
H,0,0.906871065,2.0385698619,-1.3238718647
H,0,2.6823168833,1.4243679072,0.536536948
H,0,4.4687289738,-0.2814632882,-0.5114297763
H,0,3.6843112284,-0.87906635,-2.9878910723
H,0,2.6913297295,1.7572580498,-3.1759681848
H,0,1.4902536239,0.4752349604,-3.5402222512
C,0,-0.5478108977,1.0796640179,0.5931742624
C,0,-1.5402570817,1.8975659055,0.0161810383
C,0,0.0397995175,1.5028389564,1.8010242516
C,0,-1.9066990964,3.1127317624,0.6067653159
H,0,-2.0242078263,1.570638644,-0.9063715383
C,0,-0.3302836367,2.7146292084,2.398787024
H,0,0.7836062645,0.8618823419,2.2783962427
C,0,-1.300302819,3.5267080968,1.7995304354
H,0,-2.67186905,3.7345690363,0.1379506864
H,0,0.1385354639,3.0229108644,3.3353411863
H,0,-1.5879330598,4.472095664,2.2627282091
C,0,-0.9462809813,-1.4127330196,0.2969359928
C,0,-1.8862531756,-1.3597088714,1.3620412741
C,0,-0.801720493,-2.657200461,-0.3740547811
C,0,-2.6094479748,-2.4868555706,1.7531620386
H,0,-2.0370943018,-0.4217538341,1.8961567075
C,0,-1.5244682189,-3.7813322521,0.028646902
H,0,-0.1173341162,-2.7249118194,-1.2172445509
C,0,-2.4331344843,-3.7100437894,1.0930376662
H,0,-3.3176925587,-2.4086850008,2.5805611255
H,0,-1.3861782883,-4.7228913895,-0.5069697952
H,0,-3.0032195118,-4.5901139316,1.395354647

```

### Diphenyl 2<sup>nd</sup> TS 2+2 side (Similar to 15) BPW91/6-311+G\*\*

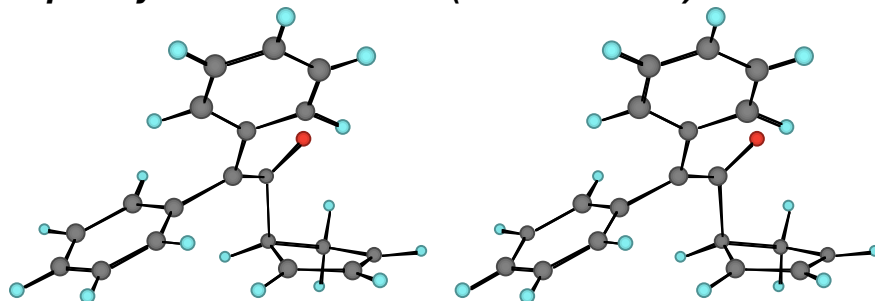

key distances CC 2.463 OC 3.026  
E(RB-PW91) = -808.894947929

```

Zero-point correction= 0.283373 (Hartree/Particle)
Thermal correction to Energy= 0.299237
Thermal correction to Enthalpy= 0.300182
Thermal correction to Gibbs Free Energy= 0.239743
Sum of electronic and zero-point Energies= -808.611575
Sum of electronic and thermal Energies= -808.595710
Sum of electronic and thermal Enthalpies= -808.594766
Sum of electronic and thermal Free Energies= -808.655205

```

|       | E (Thermal) | CV             | S              |
|-------|-------------|----------------|----------------|
|       | KCal/Mol    | Cal/Mol-Kelvin | Cal/Mol-Kelvin |
| Total | 187.774     | 65.466         | 127.205        |

C,0,-1.3293765344,1.6658697684,-1.2351798724  
C,0,-1.4932324386,1.6757767522,0.2551310195  
C,0,-2.871965491,1.4456911406,0.5465060183  
C,0,-3.6071260297,1.4777250279,-0.6106110045  
C,0,-2.7498785886,1.8522557505,-1.7922196841  
O,0,-1.7858282503,-0.6937335612,-1.6724496339  
C,0,-0.9952831981,0.1205983704,-1.1847570488  
C,0,0.0464008955,-0.1906454866,-0.2043416675  
H,0,-0.5500921019,2.3035387511,-1.6570895622  
H,0,-0.7355403055,1.9813314047,0.970255936  
H,0,-3.2709745159,1.2623974907,1.5433525779  
H,0,-4.6810318086,1.3026690802,-0.6771560078  
H,0,-2.9278533231,2.9055716475,-2.0760502161  
H,0,-2.9411772769,1.2247592787,-2.6728931649  
C,0,1.2526799152,0.6737049363,-0.1298351015  
C,0,1.881288341,1.142040175,-1.3043238858  
C,0,1.8228296291,1.0356562217,1.1123942775  
C,0,3.0173712042,1.9563989363,-1.2404349157  
H,0,1.4853044139,0.8393078896,-2.2755370561  
C,0,2.9555657337,1.8506597893,1.1754915678  
H,0,1.3612569659,0.6753831754,2.0338597065  
C,0,3.5575234488,2.3184630184,-0.0010768314  
H,0,3.4887212674,2.2982960473,-2.1637692282  
H,0,3.3708439967,2.1237696288,2.1473946917  
H,0,4.4441623281,2.9523822041,0.0493596024  
C,0,0.1032874743,-1.5209079411,0.4294246863  
C,0,1.3353484045,-2.0986044877,0.821321629  
C,0,-1.0813513078,-2.2506843962,0.7060122349  
C,0,1.3829732904,-3.3356886109,1.4702745922  
H,0,2.2659155521,-1.5763919313,0.5991526491  
C,0,-1.0300382956,-3.476580369,1.3657251529  
H,0,-2.0403089722,-1.8453041947,0.3892069252  
C,0,0.201324565,-4.0298331195,1.751240018  
H,0,2.3484540085,-3.7605839526,1.7511026897  
H,0,-1.9574070569,-4.0125504161,1.5765199798  
H,0,0.2363067222,-4.9960804691,2.2574404396

**Diphenyl 1<sup>st</sup> TS 2+2 (Similar to 10) BPW91/6-311+G\*\***

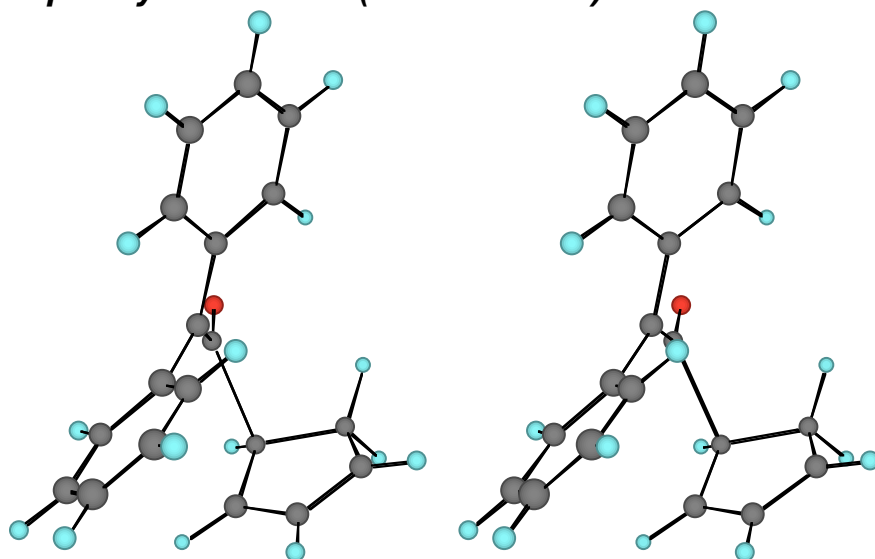

key distances 1.903 3.200  
E(RB-PW91) = -808.880726010

|                                              |                             |
|----------------------------------------------|-----------------------------|
| Zero-point correction=                       | 0.281608 (Hartree/Particle) |
| Thermal correction to Energy=                | 0.298368                    |
| Thermal correction to Enthalpy=              | 0.299312                    |
| Thermal correction to Gibbs Free Energy=     | 0.236095                    |
| Sum of electronic and zero-point Energies=   | -808.599118                 |
| Sum of electronic and thermal Energies=      | -808.582358                 |
| Sum of electronic and thermal Enthalpies=    | -808.581414                 |
| Sum of electronic and thermal Free Energies= | -808.644631                 |

|       | E (Thermal)<br>KCal/Mol | CV<br>Cal/Mol-Kelvin | S<br>Cal/Mol-Kelvin |
|-------|-------------------------|----------------------|---------------------|
| Total | 187.229                 | 67.044               | 133.051             |

C,0,-0.0525624775,0.7680705395,-2.6472157296  
 C,0,1.347797851,0.8857924702,-2.4374450583  
 C,0,1.6299289321,2.0631365123,-1.675466468  
 C,0,0.4750648398,2.7900021043,-1.5335017529  
 C,0,-0.6400206043,2.1385427461,-2.2925952577  
 C,0,-0.9706438598,-0.3559454002,-1.4155850609  
 O,0,-2.009081545,-0.6716876262,-1.9567513756  
 C,0,-0.4172221121,-0.4555274932,-0.1304030617  
 H,0,-0.4046657369,0.2514799857,-3.5409615303  
 H,0,2.100256929,0.2042721724,-2.8248310521  
 H,0,2.606549345,2.3291092028,-1.275519147  
 H,0,0.3735389788,3.7278160223,-0.9885233263  
 H,0,-0.8219752786,2.7014540374,-3.2307228285  
 H,0,-1.6012411263,2.1186249328,-1.7616974488  
 C,0,1.020645737,-0.5809271341,0.1051366401  
 C,0,1.8286139503,-1.380239861,-0.7411933235  
 C,0,1.65999605,0.0542051153,1.2022684229  
 C,0,3.2038150947,-1.533595574,-0.5096804057  
 H,0,1.3537408732,-1.9364239555,-1.5510546362  
 C,0,3.0247936979,-0.0984311065,1.4302412048  
 H,0,1.0667680831,0.6866164347,1.86388984  
 C,0,3.8085191574,-0.8945147682,0.5739644821

```

H,0,3.7952229242,-2.170240167,-1.1707582296
H,0,3.4910233912,0.4111917065,2.2758719015
H,0,4.8764292884,-1.0171195557,0.7619819321
C,0,-1.3821467005,-0.4803791303,0.995607099
C,0,-1.0533298493,-1.1363577672,2.2085165288
C,0,-2.6680171405,0.1041746093,0.9076373511
C,0,-1.9555371782,-1.1879484753,3.2738080223
H,0,-0.0874014081,-1.6324534822,2.3030416994
C,0,-3.5676303756,0.0477374738,1.9737439744
H,0,-2.9702311219,0.6071482166,-0.0109146015
C,0,-3.2189521165,-0.59324926,3.1695587427
H,0,-1.6712987496,-1.7122926096,4.1885377481
H,0,-4.5498735034,0.512936175,1.8693101055
H,0,-3.9228679045,-0.6358917099,4.0019824777

```

### Dichloro 1st TS (similar to 18) BPW91/6-311+G\*\*

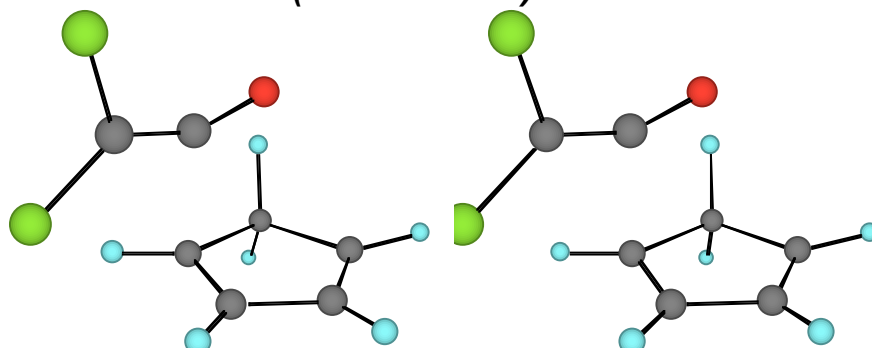

key distances OC 3.012 CC 2.288 CC 3.176  
E(RB-PW91) = -1265.97703588

```

Zero-point correction= 0.106089 (Hartree/Particle)
Thermal correction to Energy= 0.116018
Thermal correction to Enthalpy= 0.116963
Thermal correction to Gibbs Free Energy= 0.069537
Sum of electronic and zero-point Energies= -1265.870947
Sum of electronic and thermal Energies= -1265.861017
Sum of electronic and thermal Enthalpies= -1265.860073
Sum of electronic and thermal Free Energies= -1265.907499

```

|       | E (Thermal)<br>KCal/Mol | CV<br>Cal/Mol-Kelvin | S<br>Cal/Mol-Kelvin |
|-------|-------------------------|----------------------|---------------------|
| Total | 72.803                  | 35.421               | 99.817              |

```

C,0,-1.391063558,0.7786003879,-0.6958893959
C,0,-1.5603028426,1.0159569298,0.65883681
C,0,-2.633738873,0.1856913239,1.1645106907
C,0,-3.1580114617,-0.5371892155,0.1346327008
C,0,-2.4717646734,-0.165683057,-1.1470719871
O,0,-0.4128926776,-1.7732112193,0.0516031689
C,0,0.1833411465,-0.7377149946,-0.0193805992
C,0,1.3554995114,-0.0690762486,0.020671701
Cl,0,1.6184468162,1.6485512567,-0.0809270261
Cl,0,2.8083268451,-1.0537737109,0.0883922829
H,0,-0.7723296459,1.362938162,-1.3716890013
H,0,-0.9780687041,1.7172253196,1.2533832053
H,0,-2.9345862143,0.1303631661,2.2088276123

```



H,0,-3.951314204,-1.2791011809,0.2047396934  
 H,0,-3.162803812,0.3601908098,-1.832758523  
 H,0,-2.096663736,-1.0406555564,-1.7000972245

### Dichloro Intermediate (similar to 19) BPW91/6-311+G\*\*

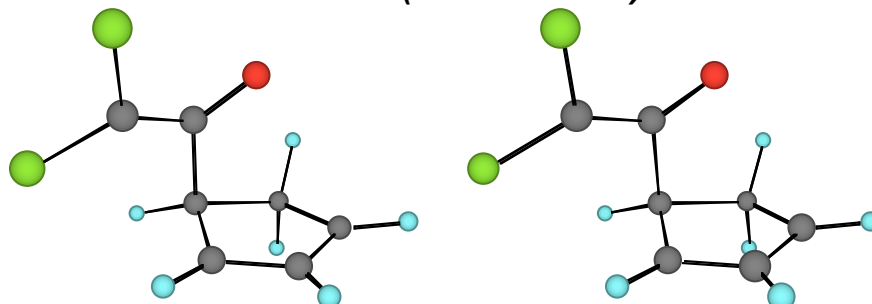

key distances OC 2.859 CC 2.762  
 E(RB-PW91) = -1265.98733358

|                                              |                             |
|----------------------------------------------|-----------------------------|
| Zero-point correction=                       | 0.108038 (Hartree/Particle) |
| Thermal correction to Energy=                | 0.117569                    |
| Thermal correction to Enthalpy=              | 0.118513                    |
| Thermal correction to Gibbs Free Energy=     | 0.072104                    |
| Sum of electronic and zero-point Energies=   | -1265.879295                |
| Sum of electronic and thermal Energies=      | -1265.869765                |
| Sum of electronic and thermal Enthalpies=    | -1265.868820                |
| Sum of electronic and thermal Free Energies= | -1265.915229                |

|       | E (Thermal) | CV             | S              |
|-------|-------------|----------------|----------------|
|       | KCal/Mol    | Cal/Mol-Kelvin | Cal/Mol-Kelvin |
| Total | 73.776      | 35.129         | 97.676         |

C,0,-1.129222366,0.5729267354,-0.7883334313  
 C,0,-1.3689903997,0.9614031289,0.6185504076  
 C,0,-2.4073314985,0.1570522354,1.14367326  
 C,0,-2.9552638565,-0.5998039943,0.1293001139  
 C,0,-2.3921607888,-0.1938097162,-1.200420031  
 O,0,-0.3650932175,-1.7131618572,-0.3473190579  
 C,0,-0.0327927188,-0.5212290923,-0.3751650864  
 C,0,1.1817012106,0.0210730054,0.1308176392  
 Cl,0,1.7119886075,1.6533906322,-0.2274900375  
 Cl,0,2.4519877736,-1.0605536044,0.5965956016  
 H,0,-0.7414522161,1.3304771233,-1.474562161  
 H,0,-0.7945436248,1.7080931337,1.1603423359  
 H,0,-2.6880745528,0.1082888531,2.1941093981  
 H,0,-3.7305976237,-1.3548835875,0.2538824298  
 H,0,-3.0930721452,0.4910955895,-1.7133118949  
 H,0,-2.1947500712,-1.0416795415,-1.8672394663

**Dichloro 2<sup>nd</sup> TS 4+2 side (similar to 20) BPW91/6-311+G\*\***

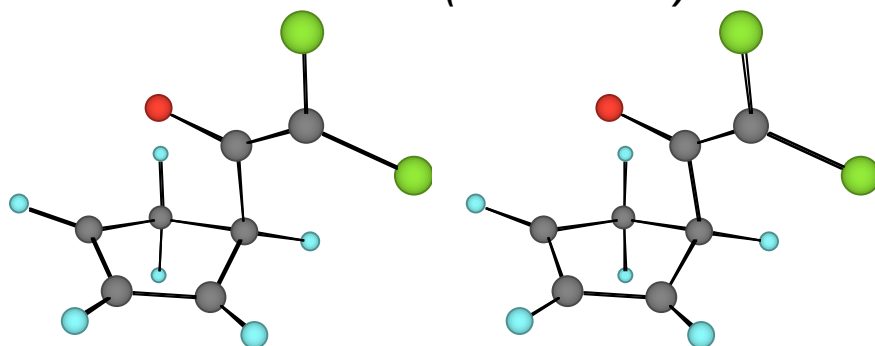

key distances OC 2.237 CC 3.013

E(RB-PW91) = -1265.98525915

|                                              |                             |
|----------------------------------------------|-----------------------------|
| Zero-point correction=                       | 0.108517 (Hartree/Particle) |
| Thermal correction to Energy=                | 0.117098                    |
| Thermal correction to Enthalpy=              | 0.118042                    |
| Thermal correction to Gibbs Free Energy=     | 0.073903                    |
| Sum of electronic and zero-point Energies=   | -1265.876743                |
| Sum of electronic and thermal Energies=      | -1265.868161                |
| Sum of electronic and thermal Enthalpies=    | -1265.867217                |
| Sum of electronic and thermal Free Energies= | -1265.911356                |

|       | E (Thermal) | CV             | S              |
|-------|-------------|----------------|----------------|
|       | KCal/Mol    | Cal/Mol-Kelvin | Cal/Mol-Kelvin |
| Total | 73.480      | 32.637         | 92.899         |

C,0,2.3663661481,0.1410107553,-1.1151882835  
 C,0,1.1385731132,0.8627707159,-0.5357547185  
 C,0,1.4749026108,1.0161981718,0.9063102419  
 C,0,2.3781189274,0.0168905463,1.2530950155  
 C,0,2.7055643993,-0.6959202119,0.0845262216  
 C,0,0.114014409,-0.3384936714,-0.319540881  
 C,0,-1.1996389855,-0.0446925892,0.0116624057  
 O,0,0.6559095031,-1.4874634257,-0.3339962746  
 Cl,0,-2.3598028865,-1.3155926192,0.2332707617  
 Cl,0,-1.8815008259,1.56096175,-0.1471195891  
 H,0,0.7304643343,1.7256704094,-1.0664802703  
 H,0,0.9578492881,1.691714643,1.5849966627  
 H,0,2.6553081551,-0.2688212438,2.265535945  
 H,0,3.3067355188,-1.6028196277,0.0488462849  
 H,0,3.170428539,0.871766625,-1.3125167861  
 H,0,2.1666975176,-0.4356609243,-2.0236415833

**Dichloro 2<sup>nd</sup> TS 2+2 side (similar to 21) BPW91/6-311+G\*\***

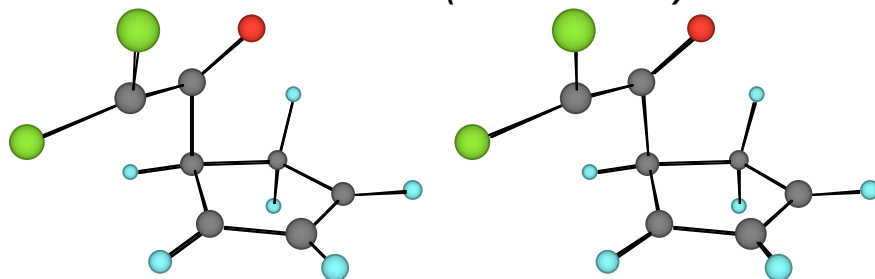

key distances CC 2.459 OC 2.998

E(RB-PW91) = -1265.98670643

|                                              |                             |
|----------------------------------------------|-----------------------------|
| Zero-point correction=                       | 0.108075 (Hartree/Particle) |
| Thermal correction to Energy=                | 0.116703                    |
| Thermal correction to Enthalpy=              | 0.117648                    |
| Thermal correction to Gibbs Free Energy=     | 0.073793                    |
| Sum of electronic and zero-point Energies=   | -1265.878631                |
| Sum of electronic and thermal Energies=      | -1265.870003                |
| Sum of electronic and thermal Enthalpies=    | -1265.869059                |
| Sum of electronic and thermal Free Energies= | -1265.912913                |

|       | E (Thermal) | CV             | S              |
|-------|-------------|----------------|----------------|
|       | KCal/Mol    | Cal/Mol-Kelvin | Cal/Mol-Kelvin |
| Total | 73.233      | 33.046         | 92.300         |

C,0,-1.1398244731,0.5775894634,-0.8574292182  
 C,0,-1.1824912507,0.8758601033,0.6085387825  
 C,0,-2.1805149269,0.0465071975,1.2001186954  
 C,0,-2.8822959225,-0.6072523655,0.2202067904  
 C,0,-2.4607135944,-0.1504320927,-1.1503423254  
 O,0,-0.2544850567,-1.710056597,-0.7120285962  
 C,0,-0.0187665,-0.5078131051,-0.6187669534  
 C,0,1.0870020242,0.0567027531,0.1323634172  
 Cl,0,1.7302367416,1.6489828968,-0.2590981908  
 Cl,0,2.2557571969,-1.0205037085,0.8284673824  
 H,0,-0.8487612799,1.3859968793,-1.5336475714  
 H,0,-0.6462860099,1.680638962,1.1026478983  
 H,0,-2.3379420149,-0.061360822,2.2718409134  
 H,0,-3.6771311887,-1.3322195416,0.3938147121  
 H,0,-3.2045845808,0.5542948496,-1.5636494004  
 H,0,-2.3456835656,-0.9780154754,-1.8621891696

### Dichloro Alternative TS for 2+2 (similar to 10) BPW91/6-311+G\*\*

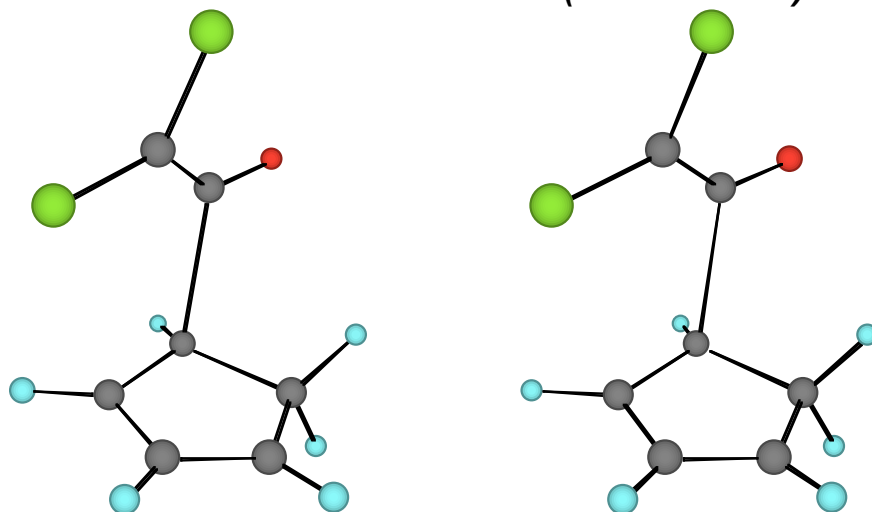

key distances 2.017 3.090  
 E(RB-PW91) = -1265.96141832

|                                          |                             |
|------------------------------------------|-----------------------------|
| Zero-point correction=                   | 0.105929 (Hartree/Particle) |
| Thermal correction to Energy=            | 0.115878                    |
| Thermal correction to Enthalpy=          | 0.116822                    |
| Thermal correction to Gibbs Free Energy= | 0.068544                    |

Sum of electronic and zero-point Energies= -1265.855489  
 Sum of electronic and thermal Energies= -1265.845540  
 Sum of electronic and thermal Enthalpies= -1265.844596  
 Sum of electronic and thermal Free Energies= -1265.892874

|       | E (Thermal)<br>KCal/Mol | CV<br>Cal/Mol-Kelvin | S<br>Cal/Mol-Kelvin |
|-------|-------------------------|----------------------|---------------------|
| Total | 72.714                  | 35.104               | 101.610             |

C,0,-0.3945199446,-0.5171171527,-1.6823048935  
 C,0,-1.3668987606,0.4868870905,-1.5481779692  
 C,0,-2.5452727194,-0.0391187669,-0.9169846672  
 C,0,-2.3926020414,-1.3900582395,-0.7584137983  
 C,0,-1.0770945213,-1.8300421897,-1.316430045  
 C,0,1.0768133121,-0.4544895986,-0.3039224861  
 O,0,1.8161299768,-1.3681810531,-0.596079593  
 C,0,0.9255432265,0.4873150001,0.6707900775  
 Cl,0,-0.1192476417,1.8732846207,0.6821606079  
 Cl,0,1.8423127091,0.2361418331,2.145915634  
 H,0,0.3442984174,-0.4608483993,-2.4816676086  
 H,0,-1.2604384028,1.508936483,-1.905010906  
 H,0,-3.4101840605,0.550319148,-0.618665392  
 H,0,-3.1110392612,-2.0647141397,-0.2944458847  
 H,0,-1.2387082286,-2.4288480411,-2.2343117226  
 H,0,-0.5008857337,-2.4799031988,-0.6418951637

### **Cyclopentadiene (1) HF/6-311+G\*\***

E(RHF) = -192.839556311

Zero-point correction= 0.098543 (Hartree/Particle)  
 Thermal correction to Energy= 0.102457  
 Thermal correction to Enthalpy= 0.103401  
 Thermal correction to Gibbs Free Energy= 0.072051  
 Sum of electronic and zero-point Energies= -192.741013  
 Sum of electronic and thermal Energies= -192.737100  
 Sum of electronic and thermal Enthalpies= -192.736156  
 Sum of electronic and thermal Free Energies= -192.767505

|       | E (Thermal)<br>KCal/Mol | CV<br>Cal/Mol-Kelvin | S<br>Cal/Mol-Kelvin |
|-------|-------------------------|----------------------|---------------------|
| Total | 64.292                  | 14.109               | 65.981              |

C,0,0.2858698357,-0.151975256,-1.1725584918  
 C,0,-0.6434958307,0.8571214422,-0.5526808638  
 C,0,-0.6758702636,0.6829550327,0.7650064507  
 C,0,0.2144421895,-0.4377537552,1.1273197707  
 C,0,0.7725626407,-0.9256288256,0.0236165616  
 H,0,-1.186014248,1.594971161,-1.1131861487  
 H,0,-1.251133159,1.2558411533,1.4683941979  
 H,0,0.3737796639,-0.7896161812,2.1296594416  
 H,0,1.4658167572,-1.7435516728,-0.0339615718  
 H,0,1.10542121,0.3261307533,-1.7073648473  
 H,0,-0.2289216541,-0.7920870431,-1.8877616361

### **Diphenylketene (2) HF/6-311+G\*\***

E(RHF) = -610.959930871

Zero-point correction= 0.208244 (Hartree/Particle)  
 Thermal correction to Energy= 0.219457  
 Thermal correction to Enthalpy= 0.220401  
 Thermal correction to Gibbs Free Energy= 0.168472  
 Sum of electronic and zero-point Energies= -610.751687  
 Sum of electronic and thermal Energies= -610.740474  
 Sum of electronic and thermal Enthalpies= -610.739530  
 Sum of electronic and thermal Free Energies= -610.791459

|       | E (Thermal)<br>KCal/Mol | CV<br>Cal/Mol-Kelvin | S<br>Cal/Mol-Kelvin |
|-------|-------------------------|----------------------|---------------------|
| Total | 137.711                 | 42.874               | 109.294             |

C,0,2.0220822209,0.7816761522,0.0404057867  
 O,0,3.082848274,1.1917313225,0.0615969048  
 C,0,0.7987759372,0.3087841323,0.015965795  
 C,0,0.1257826125,0.0180870532,1.3168331878  
 C,0,-1.2031707552,0.3893047081,1.5104622009  
 C,0,0.800844548,-0.6093331108,2.358028048  
 C,0,-1.8342552166,0.1416259262,2.7155196393  
 H,0,-1.7404664772,0.874028339,0.7157254354  
 C,0,0.171787864,-0.8409649815,3.5718183258  
 H,0,1.8190201989,-0.9284704395,2.2200139005  
 C,0,-1.1481570355,-0.4701105495,3.7544803458  
 H,0,-2.8607378094,0.4346266511,2.8471146902  
 H,0,0.7125824483,-1.3235786076,4.3663233887  
 H,0,-1.6397117828,-0.657795331,4.6921393009  
 C,0,0.1509361021,0.0888852012,-1.3113006553  
 C,0,-0.575209606,-1.0768846383,-1.5460484376  
 C,0,0.2642662877,1.0211838937,-2.3366896539  
 C,0,-1.1664679698,-1.3017265156,-2.7755333014  
 H,0,-0.6740824306,-1.8076180242,-0.7640614629  
 C,0,-0.314399137,0.7859492166,-3.5746182772  
 H,0,0.7976086412,1.9401733964,-2.1676275778  
 C,0,-1.0345101561,-0.3736401342,-3.7980974605  
 H,0,-1.7237484026,-2.2070493651,-2.9388188022  
 H,0,-0.21152668,1.5174713305,-4.356222747  
 H,0,-1.4915580751,-0.5526566515,-4.754714624

### Diphenyl 4+2 product (3) HF/6-311+G\*\*

E(RHF) = -803.799060173

Zero-point correction= 0.314684 (Hartree/Particle)  
 Thermal correction to Energy= 0.328867  
 Thermal correction to Enthalpy= 0.329811  
 Thermal correction to Gibbs Free Energy= 0.271329  
 Sum of electronic and zero-point Energies= -803.484376  
 Sum of electronic and thermal Energies= -803.470194  
 Sum of electronic and thermal Enthalpies= -803.469249  
 Sum of electronic and thermal Free Energies= -803.527731

|       | E (Thermal)<br>KCal/Mol | CV<br>Cal/Mol-Kelvin | S<br>Cal/Mol-Kelvin |
|-------|-------------------------|----------------------|---------------------|
| Total | 206.367                 | 57.079               | 123.084             |

C,0,2.2478631905,1.013494325,0.2786413031

C,0,2.9903767166,1.0102820964,-1.0584898236  
 C,0,3.6664763132,-0.1233235677,-1.1327182394  
 C,0,3.351356224,-0.8765062685,0.1509340301  
 C,0,3.2798184215,0.2693926951,1.1580548059  
 O,0,1.9644384275,-1.2599847519,0.0793157148  
 C,0,1.2327132438,-0.1163294733,0.1432198174  
 C,0,-0.092660557,-0.0783755283,0.0828314927  
 H,0,1.8584890293,1.9569987736,0.6169982636  
 H,0,2.8824745623,1.76561677,-1.814034469  
 H,0,4.2362490031,-0.503597287,-1.9590462187  
 H,0,3.9299156201,-1.7546514171,0.3835993014  
 H,0,4.208749261,0.8098665315,1.2731922208  
 H,0,2.8912179112,-0.0429407218,2.1210708516  
 C,0,-0.8068491031,1.2351140154,0.2164434926  
 C,0,-0.8388176781,1.9272779385,1.4212099682  
 C,0,-1.483846516,1.7770884176,-0.873520632  
 C,0,-1.5085233815,3.1376515804,1.5322958142  
 H,0,-0.3408585251,1.5134646504,2.2805095662  
 C,0,-2.1526818342,2.9838427495,-0.7668938679  
 H,0,-1.4839183979,1.2472183723,-1.809588378  
 C,0,-2.1660109966,3.6709535848,0.4379605872  
 H,0,-1.5199327822,3.6566282947,2.4746375775  
 H,0,-2.6636907045,3.3880438142,-1.622911818  
 H,0,-2.6874616106,4.6078498318,0.5217959157  
 C,0,-0.9353731,-1.2982570249,-0.1164879839  
 C,0,-2.1363083262,-1.4365096866,0.5763764283  
 C,0,-0.5719707997,-2.3088967269,-1.004309999  
 C,0,-2.9378922077,-2.552447999,0.4039074226  
 H,0,-2.4495483378,-0.6657215052,1.2566756187  
 C,0,-1.3765041859,-3.4213866147,-1.1827592469  
 H,0,0.3440696231,-2.2253851447,-1.5557957213  
 C,0,-2.561736293,-3.5517709365,-0.4775221324  
 H,0,-3.8568041372,-2.6373875239,0.9568809537  
 H,0,-1.0760852068,-4.1865696833,-1.8769497098  
 H,0,-3.1849475113,-4.4173171999,-0.6165990955

### Diphenyl 2+2 product (4) HF/6-311+G\*\*

E(RHF) = -803.818294978

|                                              |                             |
|----------------------------------------------|-----------------------------|
| Zero-point correction=                       | 0.313448 (Hartree/Particle) |
| Thermal correction to Energy=                | 0.328137                    |
| Thermal correction to Enthalpy=              | 0.329082                    |
| Thermal correction to Gibbs Free Energy=     | 0.269679                    |
| Sum of electronic and zero-point Energies=   | -803.504847                 |
| Sum of electronic and thermal Energies=      | -803.490158                 |
| Sum of electronic and thermal Enthalpies=    | -803.489213                 |
| Sum of electronic and thermal Free Energies= | -803.548616                 |

|       | E (Thermal) | CV             | S              |
|-------|-------------|----------------|----------------|
|       | KCal/Mol    | Cal/Mol-Kelvin | Cal/Mol-Kelvin |
| Total | 205.909     | 58.335         | 125.024        |

C,0,-2.1841909085,-1.2798698941,-0.3335199099  
 C,0,-1.5400917331,-0.0293074235,-0.9924954791  
 C,0,-2.5095972684,1.060440364,-0.5997673468  
 C,0,-3.6023659286,0.5900238262,-0.0257141982  
 C,0,-3.6080408177,-0.9159265933,0.1064934748

C,0,-1.1119006332,-1.1735360579,0.7401872397  
 O,0,-1.0132391847,-1.6383285275,1.8182380716  
 C,0,-0.260605883,-0.1797305168,-0.0818406364  
 H,0,-2.1001377137,-2.2075229225,-0.8863953938  
 H,0,-1.3664724791,-0.0548078013,-2.0582511454  
 H,0,-2.3195874054,2.1015521721,-0.7857131546  
 H,0,-4.4214881593,1.200583807,0.3116983438  
 H,0,-4.3596072433,-1.3652129728,-0.5377873246  
 H,0,-3.8136119493,-1.2472742211,1.1197624409  
 C,0,0.2647019087,1.0769341027,0.6036351893  
 C,0,0.7204407501,2.1363267505,-0.1784087595  
 C,0,0.3137000197,1.2043048051,1.9836006115  
 C,0,1.202909332,3.2932199436,0.4018799639  
 H,0,0.7024305658,2.0565597872,-1.2512218847  
 C,0,0.803648465,2.3662143876,2.5679624844  
 H,0,-0.0241250223,0.4024083486,2.6106395055  
 C,0,1.2471243442,3.4131900007,1.7840513758  
 H,0,1.5478460148,4.0992697076,-0.2214315007  
 H,0,0.8339920593,2.4449472763,3.6403268335  
 H,0,1.6248894164,4.3116262844,2.2386103067  
 C,0,0.8922522198,-0.9496869786,-0.7474177569  
 C,0,1.1880716192,-0.8314041163,-2.099183165  
 C,0,1.7113672856,-1.7574416944,0.037967974  
 C,0,2.2684456909,-1.5024159131,-2.6534983889  
 H,0,0.5896957324,-0.2100480103,-2.7383312111  
 C,0,2.7865749939,-2.4302620816,-0.5140832001  
 H,0,1.5076915883,-1.8609601138,1.0878316745  
 C,0,3.070499692,-2.3063783287,-1.8649053741  
 H,0,2.4782882872,-1.3929363773,-3.7027926881  
 H,0,3.4023855373,-3.0506632847,0.112442841  
 H,0,3.9060653573,-2.8290609523,-2.2949568075

### Dichloroketene (5) HF/6-311+G\*\*

E(RHF) = -1069.58479345

|                                              |                             |
|----------------------------------------------|-----------------------------|
| Zero-point correction=                       | 0.017068 (Hartree/Particle) |
| Thermal correction to Energy=                | 0.021888                    |
| Thermal correction to Enthalpy=              | 0.022832                    |
| Thermal correction to Gibbs Free Energy=     | -0.012459                   |
| Sum of electronic and zero-point Energies=   | -1069.567725                |
| Sum of electronic and thermal Energies=      | -1069.562906                |
| Sum of electronic and thermal Enthalpies=    | -1069.561961                |
| Sum of electronic and thermal Free Energies= | -1069.597253                |

|       | E (Thermal) | CV             | S              |
|-------|-------------|----------------|----------------|
|       | KCal/Mol    | Cal/Mol-Kelvin | Cal/Mol-Kelvin |
| Total | 13.735      | 14.658         | 74.277         |

C,0,1.2152325414,-0.5287817795,-0.2374108151  
 C,0,0.0366698691,-0.0159503091,-0.0071324837  
 O,0,2.2376222745,-0.9736572323,-0.4371741422  
 Cl,0,-1.2915596821,-1.0379244897,0.3968772748  
 Cl,0,-0.2032869448,1.6883745129,-0.1048388672

### Dichloro 2+2 product (7) HF/6-311+G\*\*

E(RHF) = -1262.47759460

Zero-point correction= 0.122026 (Hartree/Particle)  
 Thermal correction to Energy= 0.130229  
 Thermal correction to Enthalpy= 0.131173  
 Thermal correction to Gibbs Free Energy= 0.087786  
 Sum of electronic and zero-point Energies= -1262.355568  
 Sum of electronic and thermal Energies= -1262.347366  
 Sum of electronic and thermal Enthalpies= -1262.346422  
 Sum of electronic and thermal Free Energies= -1262.389808

|       | E (Thermal)<br>KCal/Mol | CV<br>Cal/Mol-Kelvin | S<br>Cal/Mol-Kelvin |
|-------|-------------------------|----------------------|---------------------|
| Total | 81.720                  | 30.085               | 91.315              |

C,0,-0.6480257891,-0.9142669357,-1.126912891  
 C,0,-0.4053817558,0.6105027378,-0.9023052846  
 C,0,-1.7444458264,1.0744206779,-0.3865850432  
 C,0,-2.6696986078,0.1358364012,-0.4661154504  
 C,0,-2.1596833365,-1.1670232273,-1.0355592805  
 C,0,0.1364711057,-1.170941621,0.1592498569  
 O,0,0.2423946506,-2.0662753696,0.9013176061  
 C,0,0.6600382514,0.2812018203,0.1796426453  
 Cl,0,2.3080575704,0.3105707201,-0.5081887246  
 Cl,0,0.6219388391,1.1379240553,1.7179330309  
 H,0,-0.1625131901,-1.3554677472,-1.987308172  
 H,0,-0.0225014552,1.206935434,-1.7179858757  
 H,0,-1.9037193785,2.0699110198,-0.0165002903  
 H,0,-3.6949301118,0.269843493,-0.1699805368  
 H,0,-2.593261222,-1.3661893441,-2.0114965715  
 H,0,-2.3878150569,-2.0176202006,-0.4014099228

### **Dichloro 4+2 product (8) HF/6-311+G\*\***

E(RHF) = -1262.44626284

Zero-point correction= 0.123541 (Hartree/Particle)  
 Thermal correction to Energy= 0.131202  
 Thermal correction to Enthalpy= 0.132146  
 Thermal correction to Gibbs Free Energy= 0.089739  
 Sum of electronic and zero-point Energies= -1262.322722  
 Sum of electronic and thermal Energies= -1262.315061  
 Sum of electronic and thermal Enthalpies= -1262.314117  
 Sum of electronic and thermal Free Energies= -1262.356524

|       | E (Thermal)<br>KCal/Mol | CV<br>Cal/Mol-Kelvin | S<br>Cal/Mol-Kelvin |
|-------|-------------------------|----------------------|---------------------|
| Total | 82.331                  | 28.847               | 89.253              |

C,0,1.3396466755,0.6142484404,0.4978993226  
 C,0,2.0666936909,0.8466822729,-0.82691361  
 C,0,2.432191888,-0.3370271971,-1.2880949569  
 C,0,1.933864689,-1.3533288141,-0.273538837  
 C,0,2.1412478635,-0.5958594172,1.0361282009  
 O,0,0.4878285688,-1.3509759783,-0.3551837814  
 C,0,0.0868400215,-0.1484268819,0.0951052049  
 C,0,-1.1765016583,0.2186274909,0.144009375  
 Cl,0,-1.6635833524,1.7748323609,0.7360252501  
 Cl,0,-2.4657911622,-0.8068199674,-0.3732156024



H,0,1.1841960935,1.4653143604,1.1373922326  
 H,0,2.1583376974,1.8012221573,-1.3092576505  
 H,0,2.8913307746,-0.5683122492,-2.2298521853  
 H,0,2.266916476,-2.3729826407,-0.361404694  
 H,0,3.1739548267,-0.3561922658,1.2448973347  
 H,0,1.6781033086,-1.086947588,1.8843630063

### Diphenyl 1<sup>st</sup> TS (Similar to 9, but later) HF/6-311+G\*\*

E(RHF) = -803.738877702

|                                              |                             |
|----------------------------------------------|-----------------------------|
| Zero-point correction=                       | 0.310028 (Hartree/Particle) |
| Thermal correction to Energy=                | 0.324652                    |
| Thermal correction to Enthalpy=              | 0.325596                    |
| Thermal correction to Gibbs Free Energy=     | 0.266438                    |
| Sum of electronic and zero-point Energies=   | -803.428849                 |
| Sum of electronic and thermal Energies=      | -803.414226                 |
| Sum of electronic and thermal Enthalpies=    | -803.413282                 |
| Sum of electronic and thermal Free Energies= | -803.472439                 |

|       | E (Thermal) | CV             | S              |
|-------|-------------|----------------|----------------|
|       | KCal/Mol    | Cal/Mol-Kelvin | Cal/Mol-Kelvin |
| Total | 203.722     | 58.444         | 124.508        |

C,0,2.3437997607,-0.4356498686,0.247754922  
 C,0,2.5647364365,-0.3884048078,-1.1723574654  
 C,0,3.076402257,-1.6037475018,-1.6297914567  
 C,0,3.3147754307,-2.3860836412,-0.5351736224  
 C,0,3.2114864682,-1.5961244389,0.7215861422  
 O,0,0.8270123086,-2.3037506624,0.1511038165  
 C,0,0.7931988063,-1.0797432795,0.1657740312  
 C,0,-0.2283907707,-0.1719844965,0.1023279518  
 H,0,2.3731099606,0.4911012103,0.7892555874  
 H,0,2.2815541488,0.4404325332,-1.7917960004  
 H,0,3.1545194098,-1.9058752058,-2.6547793283  
 H,0,3.6012475272,-3.4211183202,-0.5683931803  
 H,0,4.2043277886,-1.2274249068,0.9796281079  
 H,0,2.8112338256,-2.1563642631,1.5504703179  
 C,0,-1.6501271853,-0.6036551944,0.1559825217  
 C,0,-2.0356603082,-1.9529302619,0.1918912951  
 C,0,-2.6786814667,0.3476216686,0.1624276551  
 C,0,-3.3704587341,-2.3145593515,0.2219928477  
 H,0,-1.2846953366,-2.7138092287,0.1980847075  
 C,0,-4.0126011153,-0.0223978481,0.1936832688  
 H,0,-2.443503835,1.3938383542,0.1406071779  
 C,0,-4.3727566414,-1.3575994481,0.2227092478  
 H,0,-3.6266164468,-3.3597668454,0.2480803194  
 H,0,-4.7700147023,0.7423307935,0.1961890866  
 H,0,-5.4085013032,-1.6466579072,0.2481729837  
 C,0,0.0366416787,1.3072516896,0.1118174608  
 C,0,0.0706320196,2.0421284466,-1.0698481699  
 C,0,0.2042031401,1.9996708778,1.3098167224  
 C,0,0.2960491348,3.4111639801,-1.0620337299  
 H,0,-0.0998765898,1.5361868896,-2.0044174365  
 C,0,0.4345390065,3.365859036,1.3251428412  
 H,0,0.1488039952,1.4576110735,2.237683231  
 C,0,0.4856152342,4.0776423345,0.1366936854  
 H,0,0.3163814077,3.954852032,-1.9904019586

H,0,0.5655491071,3.8749883065,2.263930932  
 H,0,0.6599636645,5.1389334142,0.1464780277

### Diphenyl 2<sup>nd</sup> TS Claisen Rearrangement (Similar to 11) HF/6-311+G\*\*

E(RHF) = -803.738361541

|                                              |                             |
|----------------------------------------------|-----------------------------|
| Zero-point correction=                       | 0.310544 (Hartree/Particle) |
| Thermal correction to Energy=                | 0.324861                    |
| Thermal correction to Enthalpy=              | 0.325806                    |
| Thermal correction to Gibbs Free Energy=     | 0.268111                    |
| Sum of electronic and zero-point Energies=   | -803.427818                 |
| Sum of electronic and thermal Energies=      | -803.413500                 |
| Sum of electronic and thermal Enthalpies=    | -803.412556                 |
| Sum of electronic and thermal Free Energies= | -803.470251                 |

|       | E (Thermal) | CV             | S              |
|-------|-------------|----------------|----------------|
|       | KCal/Mol    | Cal/Mol-Kelvin | Cal/Mol-Kelvin |
| Total | 203.854     | 58.052         | 121.429        |

C,0,2.2199504816,0.883207841,-2.902155815  
 C,0,1.4074227196,1.1385624978,-1.637231838  
 C,0,2.3268183562,0.842245765,-0.5493917109  
 C,0,3.4118906181,0.0777858889,-1.0317553246  
 C,0,3.3202630976,0.0161162463,-2.3807698469  
 C,0,0.5505252415,-0.198142944,-1.322372096  
 C,0,-0.1711690071,-0.181734613,-0.1331122201  
 O,0,0.7756324863,-1.1243031737,-2.088704076  
 H,0,0.8516239283,2.0552306641,-1.5783508895  
 H,0,2.1925624012,1.1624284931,0.4628012277  
 H,0,4.1409701963,-0.414968791,-0.4200025636  
 H,0,3.9755526713,-0.5531957082,-3.0147216108  
 H,0,2.6464748998,1.8144622986,-3.2731531549  
 H,0,1.6571605961,0.4110063615,-3.6923476896  
 C,0,-0.4813337385,1.0953143908,0.5914918913  
 C,0,-1.2464966726,2.0986327781,0.0032605404  
 C,0,-0.0672956108,1.28678281,1.9102770816  
 C,0,-1.5559689293,3.2644978784,0.6889736079  
 H,0,-1.6157492427,1.9587559517,-0.997539303  
 C,0,-0.3767222781,2.4457767768,2.6005141843  
 H,0,0.4947854652,0.5105182797,2.4000903187  
 C,0,-1.1193571822,3.4451751281,1.9895252012  
 H,0,-2.1490764452,4.0229005626,0.2087273455  
 H,0,-0.0419122629,2.5672428051,3.6157396991  
 H,0,-1.3620229113,4.3459085282,2.524621123  
 C,0,-0.9038541656,-1.3930677384,0.3236076849  
 C,0,-2.037422328,-1.284077635,1.1346573426  
 C,0,-0.4732365722,-2.6860165202,-0.0069544369  
 C,0,-2.7077132415,-2.4047538877,1.597859466  
 H,0,-2.4098472253,-0.3155746832,1.4083485143  
 C,0,-1.1384411646,-3.8009939972,0.4655277297  
 H,0,0.3749378363,-2.8079638243,-0.6476538945  
 C,0,-2.2613388153,-3.6716914022,1.2699902814  
 H,0,-3.5806381532,-2.2809866612,2.2147274066  
 H,0,-0.7799144415,-4.7795920182,0.1974592704  
 H,0,-2.7790920557,-4.5434624509,1.6292364706

**Dichloro 1st TS (similar to 18) HF/6-311+G\*\***

E(RHF) = -1262.38593504

|                                              |                             |
|----------------------------------------------|-----------------------------|
| Zero-point correction=                       | 0.117638 (Hartree/Particle) |
| Thermal correction to Energy=                | 0.126432                    |
| Thermal correction to Enthalpy=              | 0.127376                    |
| Thermal correction to Gibbs Free Energy=     | 0.082593                    |
| Sum of electronic and zero-point Energies=   | -1262.268297                |
| Sum of electronic and thermal Energies=      | -1262.259503                |
| Sum of electronic and thermal Enthalpies=    | -1262.258559                |
| Sum of electronic and thermal Free Energies= | -1262.303342                |

|       | E (Thermal) | CV             | S              |
|-------|-------------|----------------|----------------|
|       | KCal/Mol    | Cal/Mol-Kelvin | Cal/Mol-Kelvin |
| Total | 79.337      | 31.494         | 94.254         |

C,0,-1.2202442283,0.643043371,-0.6810215723  
 C,0,-1.4753711712,0.9644395057,0.6508572349  
 C,0,-2.5485894192,0.1701080036,1.158022534  
 C,0,-3.040409301,-0.563587509,0.1427828615  
 C,0,-2.3806294371,-0.207667486,-1.1492041174  
 O,0,-0.4136818431,-1.6958770169,-0.0613966629  
 C,0,0.0607336475,-0.6100035443,-0.1366439246  
 C,0,1.2647218406,-0.0302752202,0.0220198631  
 Cl,0,1.6349539561,1.6574715801,-0.1397781344  
 Cl,0,2.6471009555,-1.0564413337,0.2357832171  
 H,0,-0.7145583361,1.3184575872,-1.3422718664  
 H,0,-0.9123588542,1.6770070264,1.2225256254  
 H,0,-2.8503687878,0.1288004082,2.1854026151  
 H,0,-3.8120809206,-1.3057403194,0.228812844  
 H,0,-3.0553443746,0.4077363988,-1.7440387606  
 H,0,-2.102039068,-1.0731018798,-1.7322208367

**Dichloro intermediate (similar to 19) HF/6-311+G\*\***

E(RHF) = -1262.38848133

|                                              |                             |
|----------------------------------------------|-----------------------------|
| Zero-point correction=                       | 0.119049 (Hartree/Particle) |
| Thermal correction to Energy=                | 0.128015                    |
| Thermal correction to Enthalpy=              | 0.128959                    |
| Thermal correction to Gibbs Free Energy=     | 0.083452                    |
| Sum of electronic and zero-point Energies=   | -1262.269432                |
| Sum of electronic and thermal Energies=      | -1262.260466                |
| Sum of electronic and thermal Enthalpies=    | -1262.259522                |
| Sum of electronic and thermal Free Energies= | -1262.305029                |

|       | E (Thermal) | CV             | S              |
|-------|-------------|----------------|----------------|
|       | KCal/Mol    | Cal/Mol-Kelvin | Cal/Mol-Kelvin |
| Total | 80.331      | 32.081         | 95.777         |

C,0,-1.1188868549,0.5768919837,-0.7351968356  
 C,0,-1.411986466,0.9667678307,0.6321533623  
 C,0,-2.4530123887,0.1859789076,1.1498792289  
 C,0,-2.9421002438,-0.5808732211,0.1366539336  
 C,0,-2.3557714885,-0.1957898655,-1.1781195106  
 O,0,-0.4171056454,-1.6770654905,-0.2567330117  
 C,0,-0.0099869981,-0.5299708357,-0.3087749867

C,0,1.1990989641,-0.014659211,0.0634685957  
 Cl,0,1.6778393985,1.645700764,-0.1802904692  
 Cl,0,2.5047028432,-1.0745178495,0.46120544  
 H,0,-0.7256612084,1.331590862,-1.3933405509  
 H,0,-0.8499013595,1.6992430901,1.1784630271  
 H,0,-2.747673575,0.1440961519,2.1789734038  
 H,0,-3.6894145915,-1.3447867447,0.251986326  
 H,0,-3.0511453668,0.4701225436,-1.6880663075  
 H,0,-2.1467039877,-1.0439250572,-1.8100890331

### **Dichloro 2<sup>nd</sup> TS 4+2 side (similar to 20) HF/6-311+G\*\***

E(RHF) = -1262.38833767

|                                              |                             |
|----------------------------------------------|-----------------------------|
| Zero-point correction=                       | 0.119125 (Hartree/Particle) |
| Thermal correction to Energy=                | 0.127250                    |
| Thermal correction to Enthalpy=              | 0.128195                    |
| Thermal correction to Gibbs Free Energy=     | 0.084806                    |
| Sum of electronic and zero-point Energies=   | -1262.269213                |
| Sum of electronic and thermal Energies=      | -1262.261087                |
| Sum of electronic and thermal Enthalpies=    | -1262.260143                |
| Sum of electronic and thermal Free Energies= | -1262.303532                |

|       | E (Thermal) | CV             | S              |
|-------|-------------|----------------|----------------|
|       | KCal/Mol    | Cal/Mol-Kelvin | Cal/Mol-Kelvin |
| Total | 79.851      | 29.940         | 91.320         |

C,0,2.3649386128,0.0806382791,-1.0963048042  
 C,0,1.1304240588,0.7657106463,-0.5166172827  
 C,0,1.4471991309,0.9095226382,0.8974596847  
 C,0,2.4403867058,0.013511027,1.2625788247  
 C,0,2.8660846367,-0.6166308228,0.1178715488  
 C,0,0.0510825423,-0.4318544736,-0.3339374647  
 C,0,-1.2129468565,-0.048098744,-0.0320510671  
 O,0,0.5405082105,-1.5548118444,-0.4049177412  
 Cl,0,-2.4794964191,-1.2167088092,0.102314631  
 Cl,0,-1.75602251,1.6097583567,0.0071474722  
 H,0,0.7358435011,1.6271671005,-1.0252395583  
 H,0,0.8943787038,1.5399235053,1.5684256778  
 H,0,2.7260123919,-0.2349839478,2.2646414065  
 H,0,3.5316953539,-1.4596498001,0.0920789537  
 H,0,3.0997935825,0.8285577864,-1.3922125132  
 H,0,2.1690195935,-0.5811534991,-1.923204428

### **Dichloro 2<sup>nd</sup> TS 2+2 side (similar to 21) HF/6-311+G\*\***

E(RHF) = -1262.38830671

|                                              |                             |
|----------------------------------------------|-----------------------------|
| Zero-point correction=                       | 0.119156 (Hartree/Particle) |
| Thermal correction to Energy=                | 0.127162                    |
| Thermal correction to Enthalpy=              | 0.128106                    |
| Thermal correction to Gibbs Free Energy=     | 0.085316                    |
| Sum of electronic and zero-point Energies=   | -1262.269151                |
| Sum of electronic and thermal Energies=      | -1262.261145                |
| Sum of electronic and thermal Enthalpies=    | -1262.260200                |
| Sum of electronic and thermal Free Energies= | -1262.302991                |

| E (Thermal) | CV | S |
|-------------|----|---|
|-------------|----|---|

|       | KCal/Mol | Cal/Mol-Kelvin | Cal/Mol-Kelvin |
|-------|----------|----------------|----------------|
| Total | 79.795   | 29.921         | 90.060         |

C,0,-1.1380077056,0.5681330364,-0.7530072254  
 C,0,-1.2859193538,0.8897092418,0.6667988213  
 C,0,-2.30164757,0.0923454898,1.235112502  
 C,0,-2.9212486667,-0.5809542417,0.2372382979  
 C,0,-2.4258474582,-0.1667784986,-1.1106188497  
 O,0,-0.3489993486,-1.6884315213,-0.4997273826  
 C,0,-0.0162263564,-0.5237873552,-0.4510143001  
 C,0,1.146238375,0.0127641434,0.0802352853  
 Cl,0,1.6489092016,1.6640317877,-0.1904966004  
 Cl,0,2.444791557,-1.0426637692,0.5114438999  
 H,0,-0.8114801585,1.3585410748,-1.4067451001  
 H,0,-0.706557088,1.6244381535,1.1876254335  
 H,0,-2.5043681865,0.006515776,2.2836467505  
 H,0,-3.7029213927,-1.3047223481,0.3811886547  
 H,0,-3.1444056318,0.5166539769,-1.5599388712  
 H,0,-2.2752332359,-1.0058216726,-1.7725290866

### **Dichloro Alternative TS for 2+2 (similar to 10) HF/6-311+G\*\***

E(RHF) = -1262.36481937

|                                              |                             |
|----------------------------------------------|-----------------------------|
| Zero-point correction=                       | 0.116821 (Hartree/Particle) |
| Thermal correction to Energy=                | 0.125933                    |
| Thermal correction to Enthalpy=              | 0.126877                    |
| Thermal correction to Gibbs Free Energy=     | 0.080630                    |
| Sum of electronic and zero-point Energies=   | -1262.247999                |
| Sum of electronic and thermal Energies=      | -1262.238886                |
| Sum of electronic and thermal Enthalpies=    | -1262.237942                |
| Sum of electronic and thermal Free Energies= | -1262.284189                |

|       | E (Thermal) | CV             | S              |
|-------|-------------|----------------|----------------|
|       | KCal/Mol    | Cal/Mol-Kelvin | Cal/Mol-Kelvin |
| Total | 79.024      | 31.865         | 97.335         |

C,0,-0.3981850567,-0.5500081603,-1.5463275133  
 C,0,-1.3828712813,0.4374893514,-1.4461277785  
 C,0,-2.6099173396,-0.090465513,-0.9366750363  
 C,0,-2.475052276,-1.4254865237,-0.8504044741  
 C,0,-1.1267926341,-1.8704585507,-1.310822754  
 C,0,0.9562122776,-0.5208931241,-0.2351820141  
 O,0,1.6378239868,-1.459033611,-0.4644381881  
 C,0,0.913927708,0.4742774055,0.6692806606  
 Cl,0,-0.208035515,1.7871798329,0.8056770301  
 Cl,0,2.157942764,0.4786112743,1.8869433594  
 H,0,0.306786186,-0.4630915282,-2.3555747702  
 H,0,-1.2498720362,1.4568441589,-1.7516205867  
 H,0,-3.4722842069,0.4907420479,-0.6776580604  
 H,0,-3.2286777772,-2.1010413713,-0.4877397645  
 H,0,-1.2267749043,-2.4227168331,-2.2444930341  
 H,0,-0.6441207771,-2.5336457198,-0.604401443

### **TS for Claisen Rearrangement of allyl vinyl ether, mPW1K/6-31+G\*\***

Key distances: OC 1.825, CC 2.184

E(RmPW+HF-PW91) = -270.389380845

```

Zero-point correction=                0.120500 (Hartree/Particle)
Thermal correction to Energy=         0.126232
Thermal correction to Enthalpy=       0.127177
Thermal correction to Gibbs Free Energy= 0.091690
Sum of electronic and zero-point Energies= -270.268881
Sum of electronic and thermal Energies= -270.263149
Sum of electronic and thermal Enthalpies= -270.262204
Sum of electronic and thermal Free Energies= -270.297691

```

|       | E (Thermal) | CV             | S              |
|-------|-------------|----------------|----------------|
|       | KCal/Mol    | Cal/Mol-Kelvin | Cal/Mol-Kelvin |
| Total | 79.212      | 21.610         | 74.688         |

```

O,0,-0.4774594235,-1.3392553893,-0.2378251765
C,0,-1.2592878654,-0.461813222,0.26394953
C,0,-1.4046418704,0.7910674689,-0.2853067918
C,0,0.6073832701,1.3947358465,0.3122547977
C,0,1.3455826717,0.4078040883,-0.3055530973
C,0,1.2453553554,-0.8999866429,0.1743490414
H,0,-1.1828373484,0.9440173297,-1.3290637997
H,0,-2.0813874064,1.496383404,0.1775627533
H,0,0.5648279225,2.3919128808,-0.1027295502
H,0,0.4132441124,1.3402381199,1.3732262562
H,0,1.6578484472,0.5539569802,-1.3301358862
H,0,1.7328175019,-1.702989759,-0.3556132129
H,0,1.1525690902,-1.0638749375,1.2381523782
H,0,-1.6437562989,-0.6364461363,1.2730415931

```

## Programs for Trajectories Calculations

The programs below are either Unix shell scripts or awk programs. Gaussian98 or Gaussian03 were used to calculate the forces at each point in trajectories.

An older version of the program used for dynamics was initially described in Supporting Information for a previous publication (3). The latest version of this program may be obtained for free by emailing D. Singleton: [singleton@mail.chem.tamu.edu](mailto:singleton@mail.chem.tamu.edu)

### 1. Program progdynstarterHP

```

#!/bin/tcsh
# This is the master control program for dynamics, in the form of a Unix
Shell Script.
#
# Necessary input files:
# freqinHP - This is the standard output from a Gaussian 98 or 03
frequency calculation using freq=hpmodes.
# progdyn.conf - This is a file giving a variety of configuration options,
called on by many of the subprograms.
#
# Optional input:
# isomernumber - A number in file isomernumber provides a start for
numbering runs.
# detour - A signal file that, by existing, signals the program to do a side
calculations

```



```

    echo "skipping start and continuing from previous runs"
else
# change from older versions - freqin and most other files are in origdir.
Advantage is compartmentalization.
# Also allows separate configurations for separate runs, so we can move to
using config files.
# Disadvantage is multiple copies of files.
    cd $origdir
        echo 3 > runpointnumber
        randgen > temp811
# lets keep the next 8 lines as the only difference between progdynstarter
and progdynstarterHP
    awk '/      1      2      3      4/,/Harmonic frequencies/'
{print}' freqinHP > temp401
    awk '/Frequencies --/ {print $3;print $4;print $5;print $6;print $7}'
temp401 > tempfreqs
    awk '/Reduced masses/ {print $4;print $5;print $6;print $7;print $8}'
temp401 > tempredmass
    awk '/Force constants/ {print $4;print $5;print $6;print $7;print $8}'
temp401 > tempfrc
    awk '/0/ && ((length($1) < 2) && ($1 < 4)) {print}' temp401 > tempmodes
    awk '/has atomic number/ {print}' freqinHP > tempmasses
    awk '/Standard orientation:/,/tional const/ {if ($3==0) print}' freqinHP
> tempstangeos
    awk -f proggenHP freqinHP > geoPlusVel
    if (test -f isomernumber) then
        cp isomernumber temp533
        awk 'BEGIN {getline;i=$1+1;print i}' temp533 > isomernumber
        rm temp533
    else
        echo 1 > isomernumber
    fi
    rm g03.com
    awk -f prog1stpoint geoPlusVel > g03.com
# TO DO - put error checking in prog1stpoint, prog2ndpoint, and progdynb so
no g03.com unless things are ok
    if (test -s g03.com) then
        rm tempfreqs tempredmass tempfrc tempmodes tempstangeos tempmasses
temp401 temp811
        cat isomernumber >> geoRecord
        cat geoPlusVel >> geoRecord
        cat g03.com
        rm -f goingwell
        cd $TMPDIR
        $g03root/g03/g03 < $origdir/g03.com > $origdir/g03.log
        cd $origdir
        grep 'Normal termination' g03.log > goingwell
        if (test -s goingwell) then
            cat g03.log >> dyn
            cp g03.log olderdynrun
        else
            break
        fi
    else
        break
    fi
    rm g03.com
    awk -f prog2ndpoint g03.log > g03.com

```



```

if (test -s g03.com) then
  rm -f goingwell
  cd $TMPDIR
  $g03root/g03/g03 < $origdir/g03.com > $origdir/g03.log
  cd $origdir
  grep 'Normal termination' g03.log > goingwell
  if (test -s goingwell) then
    cp g03.log olddynrun
    cat g03.log >> dyn
# old program progdyn replaced here with commands from progdyn
    awk '/Input orientation/,/Distance matrix/ {print}' olddynrun >
temp101
    awk '/ 0 / {print}' temp101 > old
    awk '/Input orientation/,/Distance matrix/ {print}' olderdynrun >
temp102
    awk '/ 0 / {print}' temp102 > older
    awk -f progdynb olddynrun > g03.com
    rm -f temp101 temp102 old older tempchk
  else
    break
  fi
else
  break
fi
# we've just completed a start, so lets skipstart until instructed otherwise
echo "skipping start" > skipstart
fi

while (true)
do
#increment runpointnumber
  if (test -f runpointnumber) then
    cp runpointnumber temp533
    awk 'BEGIN {getline;i=$1+1;print i}' temp533 > runpointnumber
    rm temp533
  else
    echo 4 > runpointnumber
  fi
# this loop always starts with a g03.com in place - because of the loss of
former program progdyn, I
# may have to worry about how each it is to restart from a bad run
  rm -f goingwell
  cd $TMPDIR
  $g03root/g03/g03 < $origdir/g03.com > $origdir/g03.log
  cd $origdir
  grep 'Normal termination' g03.log > goingwell
  if (test -s goingwell) then
    cp olddynrun olderdynrun
    cp g03.log olddynrun
# old program progdyn replaced here too
    awk '/Input orientation/,/Distance matrix/ {print}' olddynrun > temp101
    awk '/ 0 / {print}' temp101 > old
    awk '/Input orientation/,/Distance matrix/ {print}' olderdynrun >
temp102
    awk '/ 0 / {print}' temp102 > older
    awk -f progdynb olddynrun > g03.com
    rm -f temp101 temp102 old older tempchk
#
    cat g03.log >> dyn

```

```

else
    break
fi

# here is a cool link that lets you interupt the dynamics with a short job,
then
# it automatically goes back to the dynamics just make the file 'detour' and
it
# will delete detour, run run.com, then go back to dynamics
if (test -f detour) then
    rm detour
    date >> docslog
    cat run.com >> docslog
    cp run.log temp.log
    cd $TMPDIR
    $g03root/g03/g03 < $origdir/run.com > $origdir/run.log
    cd $origdir
fi

#stop it all nicely by creating a nogo file
if (test -f nogo) then
    break
fi

#figure out if this isomer is done
awk -f proganal g03.log >> dynfollowfile
rm -f tempdone
awk -f proganal g03.log > temp281
awk '/XXXX/ {print}' temp281 > tempdone
rm temp281
if (test -s tempdone) then
    rm -f skipstart
    rm -f olddynrun
    rm -f olderdynrun
    rm -f geoPlusVel
    break
fi
done

# We've got to break a second time to get out of this loop
# if we really want to quit. Otherwise, it will start over
# at the top
if (test -f nogo) then
    break
fi
if (test -s goingwell) then
    echo "probably starting a new point"
else
    break
fi
done
exit 0

```

## 2. Program proggenHP

```

BEGIN {
# The input files are generated before this and are tempfreqs, tempredmass,
# tempfrfc, tempmodes, and tempstangeos.
# It will count the number of atoms.
    i=1;j=1;k=1
# Danger – initialDis seems really attractive but it can go wrong for low-
energy rotational
#modes, whose excitation has the effect of stretching the bonds. Check for
reasonable starting
#structures
#
#
# version Sept 16, 2005 – incorporates searchdir but not yet rotation
# now reads random numbers from temp811, starting at a random place
# The input files are generated before this and are tempfreqs, tempredmass,
# tempfrfc, tempmodes, and tempstangeos.
# It will count the number of atoms.

# Gets from progdyn.conf
# timestep, scaling, temp, and initialdis.
# default values
initialDis=0
timeStep=1E-15
scaling=1.0
temp=298.15

# read progdyn.conf for configuration info
blankLineTester=10
while (blankLineTester>1) {
    getline < "progdyn.conf"
    if ($1=="method") method=$2
    if ($1=="charge") charge=$2
    if ($1=="multiplicity") multiplicity=$2
    if ($1=="memory") memory=$2
    if ($1=="processors") processors=$2
    if ($1=="checkpoint") checkpoint=$2
    if ($1=="diagnostics") diag=$2
    if ($1=="initialdis") initialDis=$2
    if ($1=="timestep") timeStep=$2
    if ($1=="scaling") scaling=$2
    if ($1=="temperature") temp=$2
    if ($1=="searchdir") searchdir=$2
    if ($1=="title") {
        title1=$2
        title2=$3
        title3=$4
        title4=$5
    }
    blankLineTester=length($0)
}

if (diag==1) print "***** starting proggen *****" >>
"diagnostics"
if (diag==1) print "method,charge,multiplicity,memory" >> "diagnostics"
if (diag==1) print method,charge,multiplicity,memory >> "diagnostics"
if (diag==1) print
"processors,checkpoint,title,initialdis,timestep,scaling,temperature" >>
"diagnostics"

```

```

if (diag==1) print
processors,checkpoint,title1,title2,title3,title4,initialDis,timeStep,scaling
,temp >> "diagnostics"

i=1;j=1;k=1
c=29980000000
h=6.626075E-34
avNum=6.02E23
numAtoms=0

# put geometries into array, also figure out number of atoms
# note that this picks out the last geometry in a file, assuming
# that if there is an optimization followed by a freq, nothing else follows
# kludgy - repeats last line twice - must be a better way
do {
  getline < "tempstangeos"
  if (oldline==$0) $0=""
  oldline=$0
  atom = $1
  if (atom>numAtoms) numAtoms=atom
  atNum[atom]=$2
  geoArr[atom,1]=$4
  geoArr[atom,2]=$5
  geoArr[atom,3]=$6
  velArr[atom,1]=0
  velArr[atom,2]=0
  velArr[atom,3]=0
}
while (length($0) > 0)

#output the number of atoms - this will help in reading the file later
print numAtoms

# put in atomic symbols and atomic weights - this will have to be edited for
isotopic labeling
for (i=1;i<=numAtoms;i++) {
  getline < "tempmasses"
  atWeight[i]=$9
  if (atNum[i]==6) atSym[i]="C"
  if (atNum[i]==1) atSym[i]="H"
  if (atNum[i]==8) atSym[i]="O"
  if (atNum[i]==7) atSym[i]="N"
  if (atNum[i]==5) atSym[i]="B"
  if (atNum[i]==9) atSym[i]="F"

#   print atNum[i],atSym[i],atWeight[i],geoArr[i,1],geoArr[i,2],geoArr[i,3]
}

# read in frequencies, scale them, read in Reduced masses, read in force
#constants, replace negative frequencies by 10
numFreq=3*numAtoms-6
for (i=1;i<=numFreq;i++) {
  getline < "tempfreqs"
  freq[i]=$0*scaling
  if (freq[i]<0) freq[i]=10
}
for (i=1;i<=numFreq;i++) {
  getline < "tempredmass"

```

```

    redMass[i]=$0
  }
for (i=1;i<=numFreq;i++) {
  getline < "tempfrc"
  frc[i]=$0
#   print freq[i],redMass[i],frc[i]
  }

# read in the modes
#the next 10 lines are commented for low precision modes, uncommented for
high precision modes
for (i=1;i<=numFreq;i+=5) {
  for (j=1;j<=(3*numAtoms);j++) {
    getline < "tempmodes"
    mode[i,$2,$1]=$4
    mode[i+1,$2,$1]=$5
    mode[i+2,$2,$1]=$6
    mode[i+3,$2,$1]=$7
    mode[i+4,$2,$1]=$8
  }
}

#the next 14 lines are uncommented for low precision modes, commented for
high precision modes
#for (i=1;i<=numFreq;i+=3) {
#   for (j=1;j<=numAtoms;j++) {
#     getline < "tempmodes"
#     mode[i,j,1]=$3
#     mode[i,j,2]=$4
#     mode[i,j,3]=$5
#     mode[i+1,j,1]=$6
#     mode[i+1,j,2]=$7
#     mode[i+1,j,3]=$8
#     mode[i+2,j,1]=$9
#     mode[i+2,j,2]=$10
#     mode[i+2,j,3]=$11
#   }
# }
for (i=1;i<=numFreq;i++) {
#   print mode[i,1,1],mode[i,1,2],mode[i,1,3]
  }

#convert freqs to units used in spreadsheet, pick a random number,
#and decide vibrational quantum state and energy
srand()
# want to read from temp811, starting at a random place
tester=rand()*1000
for (i=1;i<=tester;i++) {
  getline < "temp811"
  }
for (i=1;i<=numFreq;i++) {
  getline < "temp811"
  randArr[i]=$1
  getline < "temp811"
  randArrB[i]=$1
  getline < "temp811"
  randArrC[i]=$1
}
for (i=1;i<=numFreq;i++) {

```

```

    zpeJ[i]=0.5*h*c*freq[i]
    zpeK[i]=zpeJ[i]*avNum*0.239/1000
#program so that if the temp is too low, it just acts like 0 K
    if (temp<10) {
        vibN[i]=0
    }
    if (temp>=10) {
        zpeRat[i]=exp((-2*zpeK[i])/(0.001987*temp))
        Q[i]=1/(1-zpeRat[i])
        newRand=randArr[i]
#        print newRand
        vibN[i]=0
        tester=1/Q[i]
        for (j=1;j<=(50*zpeRat[i]+2);j++) {
            if (newRand>tester) vibN[i]++
            tester=tester+((zpeRat[i]^j)/Q[i])
        }
    }
}

# figure out mode energies and maximum classical shift and then
# actual shift
for (i=1;i<=numFreq;i++) {
    modeEn[i]=(zpeJ[i]*1E18)*(2*vibN[i]+1)
# no 1/2 hv for imaginary frequencies
# treating modes with frequencies <15 as translations, ignoring their zero
point energies
    if (freq[i]<15) modeEn[i]=(zpeJ[i]*1E18)*(2*vibN[i])
    maxShift[i]=(2*modeEn[i]/frc[i])^0.5
    if (initialDis==1) shift[i]=maxShift[i]*(2*(randArrC[i]-0.5))
    if (initialDis==0) shift[i]=0
# no displacements along imaginary frequencies and very low ones - it is
better to treat these
# as translations - employing a shift can give you initial weird geometries
    if (freq[i]<15) shift[i]=0
}
for (i=1;i<=numFreq;i++) {
#    print
zpeJ[i],zpeK[i],zpeRat[i],Q[i],vibN[i],modeEn[i],maxShift[i],shift[i]
}

# multiply each of the modes by its shift and add them up
for (i=1;i<=numFreq;i++) {
    for (j=1;j<=numAtoms;j++) {
        for (k=1;k<=3;k++) {
            shiftMode[i,j,k]=mode[i,j,k]*shift[i]
            geoArr[j,k]=geoArr[j,k]+shiftMode[i,j,k]
        }
    }
}

#output the new geometry.
for (j=1;j<=numAtoms;j++) {
    print atSym[j],geoArr[j,1],geoArr[j,2],geoArr[j,3],atWeight[j]
}

#now start toward velocities
for (i=1;i<=numFreq;i++) {

```

```

    kinEn[i]=100000*(modeEn[i]-0.5*frc[i]*shift[i]^2)
    vel[i]=(2*kinEn[i]/(redMass[i]/avNum))^0.5
#it is tricky here to set the velocities for modes along reaction coordinate
#I think I would like to have them all going the same direction, but setting
#the right direction is difficult. I guess the thing to do is pick one
direction
#and go with it, and if there is a problem the program will have to be
changed here.
#use searchdir in progdyn.conf to change directions
    if (freq[i]>15) {
        if (randArrB[i]<0.5) vel[i]=-vel[i]
    }
    if (freq[i]<15) {
        if (searchdir=="negative") vel[i]=-vel[i]
    }
#    print vel[i]
}

# multiply each of the modes by its velocity and add them up
for (i=1;i<=numFreq;i++) {
    for (j=1;j<=numAtoms;j++) {
        for (k=1;k<=3;k++) {
            velMode[i,j,k]=mode[i,j,k]*vel[i]*timeStep
            velArr[j,k]=velArr[j,k]+velMode[i,j,k]
        }
    }
}

#output the velocities. The markers let a later program grab these
velocities.
for (j=1;j<=numAtoms;j++) {
    print velArr[j,1],velArr[j,2],velArr[j,3]
}

#anything else I add to the file is not going to be read but will be useful
#for error checking
for (i=1;i<=numFreq;i++) {
    print randArr[i],vibN[i],vel[i]
}
print "temp ",temp
print "initialDis",initialDis
print "timeStep",timeStep

}

```

### 3. Program prog1stpoint

```

BEGIN {
# version Sept 9, 2005 - incorporatates meth3, meth4, meth5, meth6, but not
yet methodfile or rotation
# this program creates the first input file for g03
# the title should be changed as appropriate
# the isomer number comes from a file isomernumber

# read progdyn.conf for configuration info

```

```

blankLineTester=10
while (blankLineTester>1) {
  getline < "progdyn.conf"
  if ($1=="method") method=$2
  if ($1=="method2") meth2=$2
  if ($1=="charge") charge=$2
  if ($1=="multiplicity") multiplicity=$2
  if ($1=="memory") memory=$2
  if ($1=="processors") processors=$2
  if ($1=="checkpoint") checkpoint=$2
  if ($1=="diagnostics") diag=$2
  if ($1=="method3") meth3=$2
  if ($1=="method4") meth4=$2
  if ($1=="method5") meth5=$2
  if ($1=="method6") meth6=$2
  if ($1=="title") {
    title1=$2
    title2=$3
    title3=$4
    title4=$5
  }
  blankLineTester=length($0)
}

if (diag==1) print "***** starting proglstpoint
*****" >> "diagnostics"
if (diag==1) print "method,charge,multiplicity,memory" >> "diagnostics"
if (diag==1) print method,charge,multiplicity,memory >> "diagnostics"
if (diag==1) print "processors,checkpoint,title" >> "diagnostics"
if (diag==1) print processors,checkpoint,title1,title2,title3,title4 >>
"diagnostics"

getline < "isomernumber"
isomernum = $1
print "%nproc=" processors
print "%mem=" memory
print "%chk=" checkpoint
print "#p " method " force scf=(tight,nosym) "
#print "IOp(3/76=0572004280)" #for mPW1K in g03
if (meth2=="unrestricted") print "guess=mix" #for unrestricted calculations
if (length(meth3)>2) print meth3
if (length(meth4)>2) print meth4
print ""
# make the title four words exactly, leaving out spaces if necessary
print title1,title2,title3,title4
print "runpoint 1"
print "runisomer ", isomernum
print ""
print charge,multiplicity
}

(/C / || /H / || /O / || /N / || /B / || /F /) {
  printf("%s %.7f %.7f %.7f", $1,$2,$3,$4)
  print ""
}

END {
print ""

```



```

if (length(meth5)>2) print meth5
if (length(meth6)>2) print meth6
print ""
}

```

#### 4. Program prog2ndpoint

```

BEGIN {
# version Sept 9, 2005 - incorporatates meth3, meth4, meth5, meth6, but not
yet methodfile or rotation
# read progdyn.conf for configuration info
blankLineTester=10
while (blankLineTester>1) {
  getline < "progdyn.conf"
  if ($1=="method") method=$2
  if ($1=="method2") meth2=$2
  if ($1=="charge") charge=$2
  if ($1=="multiplicity") multiplicity=$2
  if ($1=="memory") memory=$2
  if ($1=="processors") processors=$2
  if ($1=="checkpoint") checkpoint=$2
  if ($1=="diagnostics") diag=$2
  if ($1=="method3") meth3=$2
  if ($1=="method4") meth4=$2
  if ($1=="method5") meth5=$2
  if ($1=="method6") meth6=$2
  if ($1=="title") {
    title1=$2
    title2=$3
    title3=$4
    title4=$5
  }
  blankLineTester=length($0)
}

if (diag==1) print "***** starting prog2ndpoint
*****" >> "diagnostics"
if (diag==1) print "method,charge,multiplicity,memory" >> "diagnostics"
if (diag==1) print method,charge,multiplicity,memory >> "diagnostics"
if (diag==1) print "processors,checkpoint,title" >> "diagnostics"
if (diag==1) print processors,checkpoint,title1,title2,title3,title4 >>
"diagnostics"

# TO DO : move timestep to progdyn.conf
i=1;j=1;k=1
timestep=1E-15
avNum=6.02E23

#get the isomer number from file
getline < "isomernumber"
isomernum = $1

print "%nproc=" processors
print "%mem=" memory
print "%chk=" checkpoint
print "#p " method " force scf=(tight,nosym) "
#print "IOp(3/76=0572004280)" #for mPW1K in g03

```

```

if (meth2=="unrestricted") print "guess=mix" #for unrestricted calculations
if (meth2=="read") print "guess=tcheck" #for reading orbitals from check,
sometimes faster, sometimes not
if (length(meth3)>2) print meth3
if (length(meth4)>2) print meth4
print ""
# make the title four words exactly, leaving out spaces if necessary
print title1,title2,title3,title4
print "runpoint 2"
print "runisomer ", isomernum
print ""
print charge,multiplicity

# ok, now we have to figure the second point. this should be
#  $x(t) = x + v*t + 1/2*F*t^2/m$ 
# so we need to set up arrays for position, velocity, and force
getline < "geoPlusVel"
numAtoms=$1
# first the geometry
for (i=1;i<=numAtoms;i++) {
  getline < "geoPlusVel"
  weight[i]=$5
  atSym[i]=$1
  for (j=1;j<=3;j++) {
    arr[i,j]=$1+j
  }
}
#now we go ahead and add the velocities
for (i=1;i<=numAtoms;i++) {
  getline < "geoPlusVel"
  for (j=1;j<=3;j++) {
    arr[i,j]=$j+arr[i,j]
  }
}
# print arr[i,1],arr[i,2],arr[i,3]
}
# first end the BEGIN
}
# now we go ahead and translate the forces and add them
(/      6      / || /      1      / || /      8      / || /      9
/) && length($3) > 9 {
i=$1
for (j=1;j<=3;j++) {
  forceArr[i,j]=$2+j
}
# print i,weight[i],forceArr[i,1],forceArr[i,2],forceArr[i,3]
}

END {
# turn the forces into motion
for (i=1;i<=numAtoms;i++) {
  for (j=1;j<=3;j++) {

forceArr[i,j]=0.5*1E10*forceArr[i,j]*627.509*(4184/(0.5292*avNum))*1E10*(time
step^2)/(weight[i]/(avNum*1000))
  arr[i,j]=arr[i,j]+forceArr[i,j]
  }
}
# print forceArr[i,1],forceArr[i,2],forceArr[i,3]
printf("%s %.7f %.7f %.7f",atSym[i],arr[i,1],arr[i,2],arr[i,3])
}

```

```

    print ""
  }
print ""
if (length(meth5)>2) print meth5
if (length(meth6)>2) print meth6
print ""
}

```

## 5. Program progdynb

```

BEGIN { #this is the main routine for generating new .com files by the Verlet
algorithm
# version Sept 11, 2005 - incorporates meth3, meth4, meth5, meth6, but not
yet methodfile or rotation

# read progdyn.conf for configuration info
blankLineTester=10
while (blankLineTester>1) {
  getline < "progdyn.conf"
  if ($1=="method") method=$2
  if ($1=="method2") meth2=$2
  if ($1=="charge") charge=$2
  if ($1=="multiplicity") multiplicity=$2
  if ($1=="memory") memory=$2
  if ($1=="processors") processors=$2
  if ($1=="checkpoint") checkpoint=$2
  if ($1=="diagnostics") diag=$2
  if ($1=="method3") meth3=$2
  if ($1=="method4") meth4=$2
  if ($1=="method5") meth5=$2
  if ($1=="method6") meth6=$2
  if ($1=="title") {
    title1=$2
    title2=$3
    title3=$4
    title4=$5
  }
  blankLineTester=length($0)
}

if (diag==1) print "***** starting progdynb *****" >>
"diagnostics"
if (diag==1) print "method,charge,multiplicity,memory" >> "diagnostics"
if (diag==1) print method,charge,multiplicity,memory >> "diagnostics"
if (diag==1) print "processors,checkpoint,title" >> "diagnostics"
if (diag==1) print processors,checkpoint,title1,title2,title3,title4 >>
"diagnostics"

OFS=" ";i=1;j=1;k=1
# TO DO - move timestep to progdyn.conf
timestep=1E-15
avNum=6.02E23

# get number of atoms and weights from geoPlusVel
getline < "geoPlusVel"
numAtoms=$1

```

```

for (i=1;i<=numAtoms;i++) {
  getline < "geoPlusVel"
  weight[i]=$5
  atSym[i]=$1
}

for (at=1;at<=numAtoms;at++) {
  getline < "old"
  oldarr[at,1]=$4
  oldarr[at,2]=$5
  oldarr[at,3]=$6
}

for (at=1;at<=numAtoms;at++) {
  getline < "older"
  olderarr[at,1]=$4
  olderarr[at,2]=$5
  olderarr[at,3]=$6
}
}

#must adjust next line for weird atoms
(/      6      / || /      1      / || /      8      / || /      7
/ || /      9      /) && length($3) > 9 {
i=$1
for (j=1;j<=3;j++) {
  forceArr[i,j]=$ (2+j)
}
# print i,weight[i],forceArr[i,1],forceArr[i,2],forceArr[i,3]
}

END {
for (i=1;i<=numAtoms;i++) {
  for (j=1;j<=3;j++) {

forceArr[i,j]=1E10*forceArr[i,j]*627.509*(4184/(0.5292*avNum))*1E10*(timestep
^2)/(weight[i]/(avNum*1000))
  arr[i,j]=arr[i,j]+forceArr[i,j]
  }
}
getline < "isomernumber"
isomernum = $1
getline < "runpointnumber"
runpointnum = $1
print "%nproc=" processors
print "%mem=" memory
print "%chk=" checkpoint
print "# " method " force scf=(maxcycle=200) "
#print "IOP(3/76=0572004280)" #for mPW1K in g03
if (meth2=="unrestricted") print "guess=mix" #for unrestricted calculations
if (meth2=="read") print "guess=tcheck" #for reading orbitals from check,
sometimes faster, sometimes not
print "pop=none "
if (length(meth3)>2) print meth3
if (length(meth4)>2) print meth4
#print "pop=none IOP(2/9=10,6/12=2)" #old IOPs for g98
print ""
print title1,title2,title3,title4

```

```

print "runpoint ",runpointnum
print "runisomer ",isomernum
print ""
print charge,multiplicity
for (i=1;i<=numAtoms;i++) {
  for (j=1;j<=3;j++) {
    newarr[i,j]=2*oldarr[i,j]-olderarr[i,j]+forceArr[i,j]
  }
  printf("%s %.7f %.7f %.7f",atSym[i],newarr[i,1],newarr[i,2],newarr[i,3])
  print ""
}
print ""
if (length(meth5)>2) print meth5
if (length(meth6)>2) print meth6
print ""
}

```

## 6. Program randgen

```

# c program
# this can be replaced by a more reliable random number
# generator when available on a system
#include <stdio.h>
#include <stdlib.h>

int a,b,c;
double d;

int product(int x, int y);

int main(void)
{
  int count=1;
  srand48(time (0));
  while (count<=10000)
  {
    d = drand48();
    printf (".20f\n", d);
    count++;
  }
  return 0;
}

```

## 7. Program proganal

```

# pronounced pro-ganal
# this program requires serious rewriting for new molecules
# or for reordered atoms
# sept 9, 2005
/ diphenylketene BBdis/ {
  printf("%s %s %s %s %s %s %s %s ",$1,$2,$3,$4,$6,$7,$8)
  runpoint=$8
}

```

```

/ 1 C 0.000000/,/ 6 O 0.000000/ {
  if (($1==6) && ($2=="O") && ($3>.5)) {
    C4O6=$6
  }
}
/ 1 C 0.000000/,/ 6 O 0.000000/ {
  if (($1==7) && ($2=="C") && ($3>.5)) {
    C1C7=$3
  }
}
/ 1 C 0.000000/,/ 6 O 0.000000/ {
  if (($1==8) && ($2=="C") && ($3>.5)) {
    C2C8=$4
  }
}
END {
  printf("%s %.3f %s %.3f %s %.3f ", "4+2 ", C4O6, " SM ", C1C7, " 2+2
", C2C8)
  if (runpoint>500) {
    print " Too many points. XXXX"
  }
  if ((C1C7<1.7) && (C2C8<1.7)) {
    print " XXXX Formed 2+2 Product Look at this file XXXX"
  }
  if ((C1C7<1.7) && (C4O6<1.7)) {
    print " Formed 4+2 Product XXXX"
  }
  if (C1C7>2.4) {
    print " Returned to SM XXXX"
  }
  print " "
}

```

## 8. progdyn.conf

conf file for dynamics. This is read by awk programs prog1stpoint, prog2ndpoint, and progdynb.

The programs won't read anything past the first blank line, and this file must end with a blank line. You can add to these comments but don't use keywords as the first word on a line. Don't delete lines - the program

has no built in default values if they aren't here.

values here are read repeatedly and can be changed in the middle of runs

```
method B3LYP/6-31G*
method2 restricted #The options here are restricted, unrestricted, and read.
#If the method is U..., put unrestricted here and the .com files will have in
them guess=mix.
#If you put read here, the .com files will contain guess=tcheck, which
sometimes makes things faster, sometimes not.
charge 0
multiplicity 1
memory 80000000
checkpoint g98.chk #uses one checkpoint file repeatedly
processors 2
diagnostics 1 # 1 prints out extra stuff to a file "diagnostics"
title diphenylketene BB 273.15 dis # the title must be exactly four words
initialdis 0
timestep 1E-15
scaling 1.0
temperature 0
#add extra lines to .com files to implement things like the iop for mPW1k
#Leave the second word blank if you are not going to use them. otherwise any
word you put in will end up in the com file
#only a single term with no spaces can be added, one per method line
method3
method4
#method5 and method6 are placed at the end of the file instead of in the
keyword section
method5
method6
#searchdir says what direction to follow the mode associated with the
imaginary frequency.
#put as values the words "negative" or "positive"
searchdir negative
#to be implemented:
#for more complicated ends of .com files, it will have to learn to use a file
methodfile
rotation 0 #use 1 to turn on rotational modes
#since displacements run into a problem with easy rotation modes such as a
methyl group,
#it would be easy to turn off displacements for particular modes. Sometimes
this would be
#the right thing to do but it would be awkward to explain it in a paper.
numberlimitedmodes 0
limitedmodes 3 5

#updated Sept 9, 2005 and believed to incorporate everything as of that date
```

## Energy Conservation in Trajectories

The graph below illustrates the conservation of energy in the trajectories employing the Verlet algorithm, but giving the total of potential energy plus kinetic energy for three long trajectories at varying energies. Overall, the energy doesn't change significantly across a run, which is the key observation. There is some apparent oscillation, which is due to a problem in calculating the kinetic energy at each point – velocities are calculated assuming a linear path of atoms from point to point, while the Verlet algorithm propagating the trajectories makes no such assumption and the trajectories taken are actually curved.

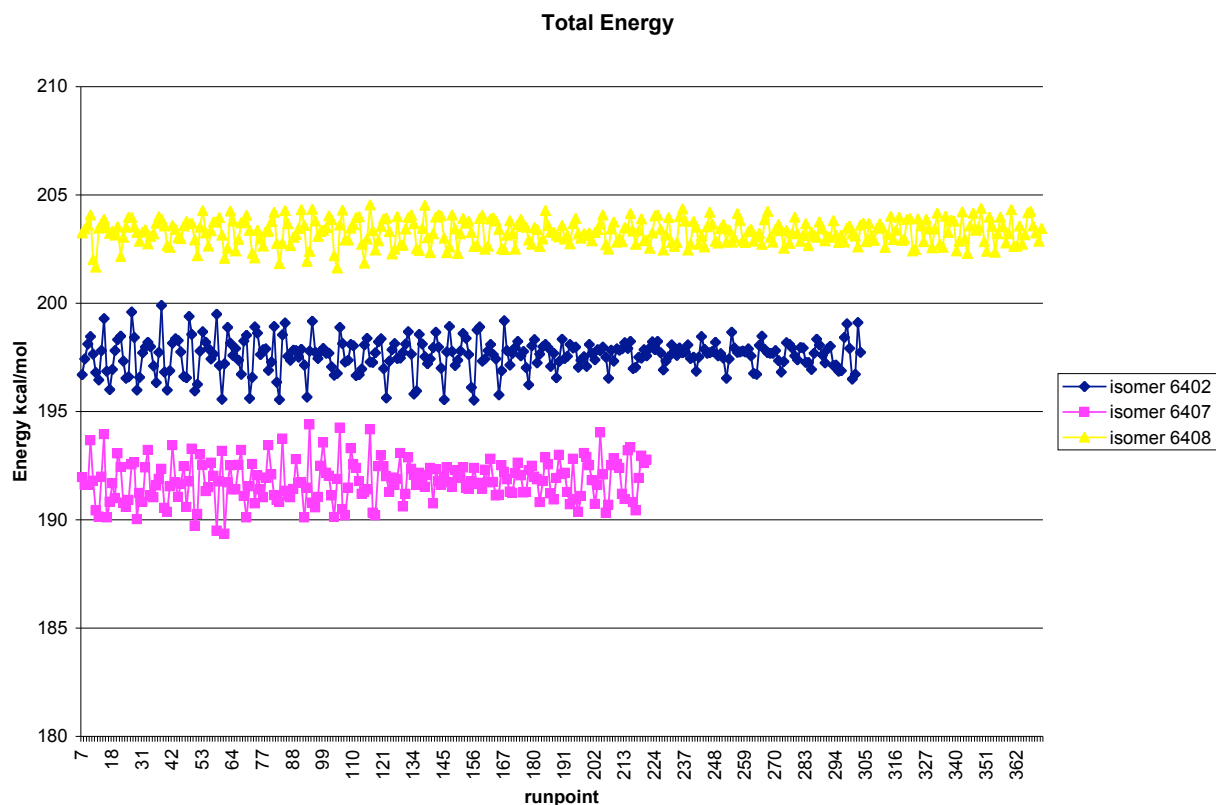

## References, including Complete Reference 46

1. Gaussian 98, Revision A.11.3, M. J. Frisch, G. W. Trucks, H. B. Schlegel, G. E. Scuseria, M. A. Robb, J. R. Cheeseman, V. G. Zakrzewski, J. A. Montgomery, Jr., R. E. Stratmann, J. C. Burant, S. Dapprich, J. M. Millam, A. D. Daniels, K. N. Kudin, M. C. Strain, O. Farkas, J. Tomasi, V. Barone, M. Cossi, R. Cammi, B. Mennucci, C. Pomelli, C. Adamo, S. Clifford, J. Ochterski, G. A. Petersson, P. Y. Ayala, Q. Cui, K. Morokuma, N. Rega, P. Salvador, J. J. Dannenberg, D. K. Malick, A. D. Rabuck, K. Raghavachari, J. B. Foresman, J. Cioslowski, J.



- 
- V. Ortiz, A. G. Baboul, B. B. Stefanov, G. Liu, A. Liashenko, P. Piskorz, I. Komaromi, R. Gomperts, R. L. Martin, D. J. Fox, T. Keith, M. A. Al-Laham, C. Y. Peng, A. Nanayakkara, M. Challacombe, P. M. W. Gill, B. Johnson, W. Chen, M. W. Wong, J. L. Andres, C. Gonzalez, M. Head-Gordon, E. S. Replogle, and J. A. Pople, Gaussian, Inc., Pittsburgh PA, 2002.
2. (given as ref. 46 in the main text). Gaussian 03, Revision C.02, Frisch, M. J.; Trucks, G. W.; Schlegel, H. B.; Scuseria, G. E.; Robb, M. A.; Cheeseman, J. R.; Montgomery, Jr., J. A.; Vreven, T.; Kudin, K. N.; Burant, J. C.; Millam, J. M.; Iyengar, S. S.; Tomasi, J.; Barone, V.; Mennucci, B.; Cossi, M.; Scalmani, G.; Rega, N.; Petersson, G. A.; Nakatsuji, H.; Hada, M.; Ehara, M.; Toyota, K.; Fukuda, R.; Hasegawa, J.; Ishida, M.; Nakajima, T.; Honda, Y.; Kitao, O.; Nakai, H.; Klene, M.; Li, X.; Knox, J. E.; Hratchian, H. P.; Cross, J. B.; Bakken, V.; Adamo, C.; Jaramillo, J.; Gomperts, R.; Stratmann, R. E.; Yazyev, O.; Austin, A. J.; Cammi, R.; Pomelli, C.; Ochterski, J. W.; Ayala, P. Y.; Morokuma, K.; Voth, G. A.; Salvador, P.; Dannenberg, J. J.; Zakrzewski, V. G.; Dapprich, S.; Daniels, A. D.; Strain, M. C.; Farkas, O.; Malick, D. K.; Rabuck, A. D.; Raghavachari, K.; Foresman, J. B.; Ortiz, J. V.; Cui, Q.; Baboul, A. G.; Clifford, S.; Cioslowski, J.; Stefanov, B. B.; Liu, G.; Liashenko, A.; Piskorz, P.; Komaromi, I.; Martin, R. L.; Fox, D. J.; Keith, T.; Al-Laham, M. A.; Peng, C. Y.; Nanayakkara, A.; Challacombe, M.; Gill, P. M. W.; Johnson, B.; Chen, W.; Wong, M. W.; Gonzalez, C.; and Pople, J. A.; Gaussian, Inc., Wallingford CT, 2004.
3. Singleton, D. A.; Hang, C.; Szymanski, M. J.; Greenwald, E. E. *J. Am. Chem. Soc.* **2003**, *125*, 1176-1177.
